# Supplementary material for: Plasma Metabolomic Profiles Reflective of Glucose Homeostasis in Non-Diabetic and Type 2 Diabetic Obese African-American Women
Source: PLoS One. 2010 Dec 10;5(12):e15234. doi: 10.1371/journal.pone.0015234 (PMC3000813; doi:10.1371/journal.pone.0015234)
Supplement: Table S2 — Plasma Metabolite list comparing type 2 diabetic and non-diabetic obese African-American women. Values are quantifier peak heights determined for each subject used in the analyses, and metabolites are identified in the leftward column. Mass spec information is provided in columns B–E, and in some cases, KEGG identifiers are provided. Unpaired t-tests were used to evaluate differences between diabetic and non-diabetic women, as noted. (XLS) [file pone.0015234.s002.xls]

## Sheet: S2, Supplemental Table 2
S2, SUPPLEMENTAL TABLE 2: METABOLITE QUANTIFIER ION PEAK HEIGHTS, COMPARING TYPE 2 DM VS. CONTROL SUBJECTS
								G/G Genotypes:																					G/A Genotypes:
Subject ID:								383	360	257	376	273	175	33	345	266	171	422	94	385	261	374	226	315	347	142	227	160	163	179	201	442	340	343	336	267	255	333	164	204	300	285	184	217	316	319	397	297	326
Diabetic?								YES	YES	YES	YES	YES	YES	YES	YES	YES	YES	YES	YES	YES	YES	YES	YES	YES	YES	YES	YES	YES	YES	YES	YES	YES	YES	YES	YES	YES	YES	YES	YES	YES	YES	YES	YES	YES	YES	YES	YES	YES	YES
BB name	ret index	quant ion	BB id	mass spec	PubChem	KEGG
206604	653437	147	206604	85:223.0 86:128.0 87:184.0 88:184.0 89:827.0 90:149.0 91:174.0 92:21.0 93:56.0 94:21.0 95:46.0 96:127.0 97:39.0 98:195.0 99:246.0 100:777.0 101:353.0 102:80.0 103:6283.0 104:584.0 105:326.0 106:26.0 107:9.0 108:3.0 110:21.0 111:16.0 112:34.0 113:120.0 114				3124322	509800	629251	74264	3755870	3441445	365496	73694	71735	2069761	33590	2239061	81733	2439971	4400883	688854	743831	406192	35459	1525052	322652	3955015	474802	857071	3910399	269332	43537	854405	331811	1233698	2873544	3090431	181091	244020	3129848	3517260	233076	2065738	46903	50197	477739	283817
3-hydroxybutanoic acid	278929	191	199774	85:1032.0 86:45.0 87:1381.0 88:11231.0 89:1535.0 90:124.0 92:82.0 93:92.0 94:173.0 95:126.0 96:28.0 97:148.0 98:175.0 99:2490.0 100:516.0 101:4455.0 102:756.0 103:2543.0 104:310.0 105:767.0 106:105.0 107:176.0 108:29.0 109:440.0 110:30.0 111:42.0 112:19.0	11266	C05984		118595	17109	17032	22587	51570	115696	22869	7329	27021	27000	23527	12715	67720	19769	63425	59768	7545	11032	26990	29141	95573	58472	22080	8883	39094	19867	56261	49924	50607	30752	325798	264714	16149	23090	15768	32500	14189	6140	42146	51140	7064	12250
223513	808133	98	223513	85:35.0 86:155.0 87:80.0 89:1128.0 94:18.0 95:28.0 96:96.0 98:7743.0 99:753.0 100:424.0 101:231.0 102:9.0 103:6080.0 104:552.0 105:90.0 109:36.0 110:121.0 113:135.0 114:129.0 117:1687.0 118:57.0 122:2.0 123:63.0 124:63.0 125:188.0 128:135.0 129:878.0 130:				25647	8180	13005	12943	22135	17427	8255	7146	9862	9136	11556	11816	8629	9483	21365	11703	9104	9208	9891	11144	11441	16633	12508	10962	13768	11350	6984	13152	11764	19417	22694	7572	10130	5788	11985	14349	6973	7383	9370	13139	4442	9354
228939	253563	154	228939	86:1998.0 88:1610.0 89:223.0 90:127.0 91:1029.0 92:59.0 94:7544.0 95:1768.0 96:4263.0 97:2414.0 98:7956.0 99:2889.0 100:19590.0 101:1373.0 102:3035.0 103:25.0 105:125.0 106:248.0 107:8357.0 108:1783.0 109:277.0 110:18771.0 111:4966.0 112:2756.0 113:1237.0				53613	22795	33474	82450	143447	65433	126804	45176	23608	134013	8394	277303	7704	84913	136930	6841957	179311	29209	34381	156437	66202	149212	17159	39996	150008	95512	27438	113583	86447	105934	18130	28250	21962	197730	97051	3516	23492	186598	46110	35063	60341	19876
225539	798935	387	225539	85:876.0 86:298.0 88:454.0 89:4210.0 90:134.0 92:41.0 94:511.0 95:491.0 96:172.0 97:194.0 98:18165.0 99:2164.0 100:369.0 101:1894.0 102:413.0 103:21196.0 104:1528.0 105:1224.0 107:220.0 109:125.0 110:174.0 111:402.0 112:245.0 113:853.0 114:654.0 115:74.0				3194	828	1329	1530	2037	1662	1284	364	1105	1417	924	1504	1099	839	2638	1407	1530	840	985	1473	1145	2576	1105	884	2009	1119	543	1407	1177	2520	2300	902	1054	1134	1816	1073	636	1133	1386	985	702	685
226851	788409	373	226851	85:4922.0 86:1762.0 87:693.0 88:677.0 89:7422.0 90:420.0 91:289.0 93:161.0 94:391.0 95:323.0 96:595.0 97:206.0 98:1021.0 99:1121.0 100:1688.0 101:1977.0 102:623.0 103:30135.0 104:2735.0 105:1786.0 107:102.0 108:192.0 109:674.0 110:955.0 111:1758.0 112:485				16275	6298	6832	8407	8223	8641	5110	5578	5498	5924	6671	7294	4537	5565	10560	7446	7557	5849	4684	6191	5564	9622	8814	5627	7731	4687	4243	5906	5638	9608	12200	5544	5322	4388	8922	7538	5364	5068	5562	7334	2940	5416
210286	701682	217	210286	85:1289.0 86:1081.0 87:1304.0 88:702.0 89:17656.0 90:1578.0 91:1561.0 92:44.0 93:48.0 94:67.0 95:185.0 96:118.0 97:930.0 98:403.0 99:1300.0 100:12235.0 101:6644.0 102:4796.0 103:19766.0 104:2141.0 105:2651.0 106:474.0 107:129.0 108:27.0 109:86.0 110:139.0				14547	10712	21485	18371	17444	14675	7942	12936	9319	7874	16697	16453	8627	8961	9517	7932	2792	15426	13177	13952	11893	21670	11192	11482	12989	15764	7545	6839	9202	8497	14729	11626	14464	3321	10979	12510	18520	7441	7756	12047	7010	11017
199794	681176	361	199794	85:681.0 86:319.0 87:427.0 88:365.0 89:5211.0 90:455.0 91:548.0 92:74.0 93:47.0 94:60.0 95:82.0 96:148.0 97:213.0 98:132.0 99:488.0 100:978.0 101:1557.0 102:964.0 103:8073.0 104:888.0 105:983.0 106:119.0 107:79.0 108:43.0 109:226.0 110:222.0 111:331.0 112				96466	53912	80587	73620	112150	80620	50004	52176	56189	55501	40296	88606	44578	54495	129063	68451	63649	62564	53312	73927	56711	144320	42119	52481	103561	64897	43833	64172	71388	90993	107200	60584	36856	64536	91399	69147	53599	69094	63423	72474	39721	43014
maltose	946608	361	231911	85:7049.0 86:5988.0 87:549.0 88:4620.0 89:85686.0 90:7599.0 91:4229.0 92:860.0 93:61.0 94:1027.0 95:1526.0 96:1691.0 97:9033.0 98:2204.0 99:8184.0 100:23851.0 101:26724.0 102:18429.0 103:182661.0 104:18895.0 105:36802.0 106:4552.0 107:1807.0 108:452.0 109	6255	C01971		3577	3641	1449	2202	397	813	3214	2170	1889	2041	2986	3433	2256	791	5170	486	2215	628	1687	1110	869	9025	392	1622	3243	1372	747	1211	650	2315	7094	1525	617	1975	2170	792	1554	3548	7074	1505	34350	694
228143	673081	187	228143	86:985.0 87:23376.0 88:5544.0 89:20363.0 90:963.0 91:635.0 92:630.0 93:3002.0 94:932.0 95:1382.0 96:2427.0 97:3160.0 98:4245.0 99:176.0 100:3516.0 101:3617.0 103:5684.0 104:1914.0 105:120.0 106:3101.0 107:2432.0 108:1036.0 110:3246.0 111:880.0 112:524.0 1				4134	646	1150	3434	4452	2215	2630	595	2968	2885	405	1222	3043	2787	4226	3195	2733	3532	2951	2971	897	4983	878	2567	3801	2707	2787	2690	3124	3710	4813	2335	3938	955	3768	2966	3110	761	3180	1003	703	904
oleic acid	778858	339	199610	85:369.0 86:112.0 87:70.0 88:45.0 89:228.0 90:40.0 91:137.0 92:28.0 93:420.0 94:192.0 95:1135.0 96:1726.0 97:1126.0 98:1312.0 99:276.0 100:8.0 101:70.0 102:12.0 103:12.0 104:9.0 105:212.0 106:36.0 107:253.0 108:109.0 109:502.0 110:646.0 111:392.0 112:214.	445639	C01712		45798	8347	21017	10125	28310	36779	13846	5764	29547	29140	11869	18164	25438	22819	51487	32660	4683	11286	66262	16038	52130	27108	22995	16960	32356	11013	9128	24480	27983	23555	52247	23246	22317	11833	18113	25268	7147	15048	14109	12549	8513	13380
199777	675254	217	199777	85:258.0 86:162.0 87:355.0 88:172.0 89:3086.0 90:239.0 91:378.0 92:6.0 93:40.0 94:24.0 95:35.0 96:74.0 97:108.0 98:80.0 99:236.0 100:522.0 101:931.0 102:431.0 103:5496.0 104:522.0 105:624.0 106:60.0 107:16.0 108:21.0 109:202.0 110:186.0 111:194.0 112:105.				394628	268438	306845	298288	407294	330501	226300	271382	249424	247204	224778	328972	232778	265742	475435	264399	243865	290541	229548	276594	224417	543481	235439	273723	371360	234730	209575	238731	279508	319768	437823	317908	192192	249301	338923	357340	243171	251221	269467	327115	175960	246906
241310	782338	373	241310	85:19122.0 86:6088.0 87:18352.0 88:5495.0 89:43110.0 90:4339.0 91:10523.0 92:1791.0 93:1311.0 94:3258.0 95:4112.0 96:5450.0 97:2870.0 98:4956.0 99:9390.0 100:9038.0 101:11585.0 102:4929.0 103:247151.0 104:23225.0 105:14276.0 106:1497.0 107:1610.0 108:3532				3670	1392	1592	1866	1749	2017	1234	1168	1340	1390	1547	1890	1086	1230	2142	1865	1364	1358	1178	1403	1132	2263	2145	1546	2073	1256	1098	1353	1270	2141	2570	1109	1370	1074	2018	1606	1259	967	747	2026	579	1398
270003	736904	217	270003	85:285.0 86:190.0 87:108.0 89:1156.0 90:261.0 91:205.0 92:208.0 93:119.0 98:490.0 100:51.0 101:119.0 103:4850.0 105:775.0 107:1420.0 109:203.0 111:491.0 114:565.0 115:35.0 116:106.0 117:2963.0 118:968.0 120:17.0 122:251.0 123:8.0 124:158.0 125:71.0 128:21				6931	3569	7852	6164	10924	6360	4741	3375	4544	5528	2558	8862	5261	4968	11270	5288	6612	4292	4209	6884	4540	10784	2504	4287	9749	7631	3551	6507	6270	7803	8201	5298	5635	5704	7728	6777	3844	6241	5095	4792	3556	3685
213143	873684	446	213143	85:26.0 86:205.0 87:191.0 89:2243.0 90:135.0 96:2511.0 97:614.0 98:1348.0 99:317.0 100:159.0 101:629.0 102:344.0 103:10626.0 104:1494.0 105:696.0 106:79.0 107:434.0 108:47.0 110:30.0 111:90.0 112:92.0 113:303.0 114:378.0 115:57.0 116:430.0 117:2790.0 118:				3293	2574	2301	3629	2333	2801	1659	4004	2110	2674	2934	2673	1736	2004	2722	3152	2540	3101	2189	2672	2336	3338	1960	3361	2075	1810	2053	1943	2582	2854	2518	2742	1937	1975	3985	2606	2981	2139	1801	2811	1933	2757
208655	688305	217	208655	85:150.0 86:39.0 87:52.0 88:18.0 89:590.0 90:66.0 91:259.0 92:185.0 93:3.0 95:3.0 96:1.0 97:15.0 98:3.0 99:90.0 100:176.0 101:378.0 102:55.0 103:855.0 104:56.0 105:111.0 106:4.0 107:28.0 108:1.0 109:5.0 110:21.0 111:75.0 112:5.0 113:101.0 114:24.0 115:125				5269	6034	6485	4636	7276	5255	2598	6214	4923	2867	4990	2948	3575	3718	3464	3127	3244	5379	4122	2725	4559	4608	5361	6268	1636	2912	5012	2337	2960	2106	9517	5642	2029	2851	3419	5627	5095	2301	3564	6861	2427	5931
212208	705463	147	212208	85:53.0 87:64.0 88:95.0 89:324.0 90:21.0 91:54.0 93:13.0 95:6.0 101:188.0 102:23.0 103:2943.0 104:240.0 105:131.0 113:6.0 115:90.0 116:57.0 117:1041.0 118:48.0 119:44.0 122:4.0 124:3.0 125:1.0 127:1.0 129:228.0 131:398.0 133:926.0 134:93.0 135:43.0 141:19				11388	10418	14775	11451	12637	8705	9301	10320	10403	10737	5843	11926	12146	2198	11966	269	9221	533	11347	2373	2244	14733	9647	9328	1618	10634	2258	8686	10782	10290	12717	10128	10023	12654	1628	11644	10195	11598	12713	11643	12097	5364
227352	927021	132	227352	85:89.0 86:554.0 89:5802.0 90:513.0 91:6510.0 92:665.0 93:270.0 95:49.0 97:43.0 98:204.0 99:336.0 100:858.0 101:1235.0 102:999.0 103:23328.0 104:3190.0 105:6018.0 106:566.0 111:150.0 112:153.0 113:307.0 114:377.0 115:804.0 116:635.0 117:10787.0 118:1182.0				5458	3170	4184	4211	5491	3989	2149	2351	3485	3174	2544	4579	2598	2827	4611	3515	3917	2437	2229	3791	3353	6780	3071	2419	4914	2367	2209	3241	4003	3984	5233	2315	3228	2811	4210	3110	2920	3663	3056	3126	2276	2876
226853	966330	272	226853	85:9.0 89:920.0 93:71.0 94:64.0 95:121.0 98:361.0 100:384.0 101:188.0 102:907.0 103:3691.0 104:1.0 105:75.0 106:125.0 110:67.0 112:70.0 114:164.0 115:90.0 116:1597.0 117:993.0 118:44.0 123:11.0 124:30.0 128:685.0 129:793.0 132:78.0 133:652.0 136:18.0 138:				4459	540	2939	3974	1938	3873	2033	970	877	3136	2737	3033	1849	298	5202	2309	3758	3117	2343	3011	2461	1585	196	3537	4171	2295	2732	3601	2834	5121	923	3577	663	2948	667	3086	1907	3052	221	1564	2216	2348
281329	705694	245	281329	90:90.0 93:179.0 98:625.0 100:6.0 101:159.0 102:283.0 103:315.0 109:25.0 110:8.0 114:181.0 116:17.0 117:1116.0 128:101.0 129:585.0 133:77.0 140:149.0 142:308.0 143:102.0 144:139.0 145:8.0 154:292.0 155:20.0 156:208.0 160:270.0 162:20.0 166:40.0 168:46.0 1				800	1280	742	1531	1125	740	2221	3147	1320	2712	897	1309	579	1397	2326	1391	1139	1651	1430	1763	808	1860	1173	1945	927	1287	1042	407	998	1075	1917	2003	1014	1644	1858	1067	2342	1264	340	2190	863	160
213193	865396	446	213193	85:72.0 87:165.0 88:197.0 89:799.0 90:137.0 91:1235.0 92:187.0 93:1188.0 94:627.0 95:1138.0 96:953.0 97:242.0 98:622.0 99:150.0 100:114.0 101:240.0 102:153.0 103:4178.0 104:483.0 105:439.0 106:136.0 107:538.0 108:645.0 109:232.0 110:350.0 111:26.0 112:30.				1622	1143	975	1929	1135	1470	771	1952	960	1422	1467	1431	1003	964	1543	1790	1471	1613	999	1377	1192	1661	981	1514	1336	867	1054	1173	1377	1779	1085	1709	822	1103	2007	1451	1406	1064	614	1324	965	1459
gluconic acid	693140	333	211990	85:147.0 86:29.0 87:286.0 88:169.0 89:1308.0 90:102.0 91:62.0 92:5.0 93:16.0 94:2.0 95:55.0 97:203.0 98:21.0 99:231.0 100:43.0 101:856.0 102:1031.0 103:7085.0 104:680.0 105:353.0 106:22.0 107:72.0 108:5.0 109:8.0 111:89.0 113:194.0 114:12.0 115:293.0 116:	604	C00257		5186	4605	8519	3696	8854	5081	4238	4756	3780	5624	3904	5325	4822	5435	7000	4024	4519	4191	4846	4978	4852	9049	4404	4336	7046	4406	4437	5003	5538	6273	7726	6668	4412	4896	5483	9165	4586	3948	4070	5663	4216	5990
223505	810335	246	223505	85:410.0 86:539.0 87:104.0 88:90.0 89:1966.0 90:67.0 91:122.0 94:67.0 95:442.0 97:23.0 98:553.0 99:201.0 100:577.0 101:245.0 102:214.0 103:7628.0 104:619.0 105:245.0 107:64.0 108:135.0 109:24.0 110:79.0 111:132.0 112:118.0 113:243.0 114:1755.0 115:281.0 1				6046	4585	5430	4815	5727	4548	3921	6526	4345	6272	3743	3169	2136	2612	3873	5802	2114	5461	5063	3955	4071	4693	3533	6460	2304	3282	3181	1989	2675	4172	4907	4160	3177	1702	4297	5332	3844	2678	2160	6084	3772	3768
228315	553878	299	228315	85:2560.0 86:3617.0 87:1255.0 88:4095.0 89:2700.0 90:630.0 91:1258.0 92:891.0 93:257.0 94:1650.0 95:1190.0 96:2228.0 97:3360.0 98:32732.0 99:3389.0 100:14733.0 101:2479.0 102:13323.0 103:4309.0 104:2161.0 105:4973.0 106:1162.0 107:646.0 108:2569.0 109:153				2001	3500	4492	2325	1062	1744	4245	3481	21711	1831	4876	887	1331	1493	1408	1476	901	3422	3164	1073	1757	1381	2536	3367	373	941	3143	1639	1310	780	1763	2040	3514	894	1859	1189	2940	776	2207	69304	1679	9797
fructose	642325	307	199181	85:1220.0 86:424.0 87:606.0 88:397.0 89:7181.0 90:605.0 91:361.0 92:86.0 93:302.0 94:331.0 95:2557.0 96:951.0 97:766.0 98:230.0 99:313.0 100:934.0 101:1387.0 102:438.0 103:30670.0 104:2909.0 105:2036.0 106:145.0 107:150.0 108:68.0 109:659.0 110:432.0 111:	5984	C00095		392774	465333	529658	470991	572347	692781	474261	651054	432271	572137	359718	644208	464651	561018	769540	499379	454758	589449	486345	462320	494916	801704	494023	529599	492035	410134	393062	315842	508478	657036	594368	689762	344714	525656	686024	715465	478558	621399	405608	476679	451003	284971
222049	701919	117	222049	87:1894.0 88:1875.0 89:1291.0 90:22.0 101:4120.0 102:259.0 103:6026.0 104:788.0 105:78.0 106:64.0 109:81.0 115:108.0 116:7071.0 117:13582.0 118:1642.0 119:511.0 120:17.0 126:210.0 130:284.0 132:84.0 133:160.0 134:406.0 135:39.0 136:63.0 139:21.0 145:220.0				11932	10267	5076	9963	13328	12513	7171	10764	8848	7390	6791	7347	7134	4141	8799	8510	3645	10806	8306	6408	8140	13949	9516	10056	7733	4302	4825	2569	8940	7111	14729	16024	21161	5328	21743	11057	8488	4093	9050	11978	5535	9139
228147	699907	261	228147	85:5481.0 86:12568.0 87:5666.0 88:5399.0 89:79280.0 90:7883.0 91:4382.0 92:559.0 93:593.0 94:1678.0 95:2237.0 96:1986.0 97:4708.0 98:4101.0 99:8156.0 100:17639.0 101:23048.0 102:9811.0 103:108321.0 104:11929.0 105:38969.0 106:4444.0 107:2337.0 108:903.0 1				1117	770	798	965	1458	1126	757	867	893	652	305	626	734	713	958	1205	916	676	846	811	759	1474	860	1317	787	705	745	739	1047	1148	1292	1178	912	886	1142	1221	796	670	627	1071	765	759
palmitoleic acid	706298	129	203265	85:634.0 86:251.0 87:101.0 88:73.0 89:389.0 90:24.0 91:638.0 92:138.0 93:970.0 94:446.0 95:2278.0 96:2964.0 97:1797.0 98:2172.0 99:487.0 100:94.0 101:210.0 102:34.0 105:514.0 106:53.0 107:496.0 108:235.0 109:940.0 110:1010.0 111:563.0 112:318.0 113:92.0 1	445638	C08362		3088	6068	12923	6988	19575	17725	8853	5482	15653	13110	7510	2466	11125	13609	19507	14441	4819	6233	21272	9134	25275	11123	9287	10714	15560	9093	5793	10235	2277	10424	30060	11729	29892	8776	9577	11907	5439	8650	9061	7222	6254	3901
228911	632392	307	228911	85:134.0 87:13.0 88:56.0 89:3196.0 90:46.0 93:48.0 95:314.0 96:12.0 98:113.0 100:726.0 101:388.0 102:81.0 103:24235.0 104:2031.0 105:332.0 106:7.0 107:1059.0 108:4.0 110:77.0 113:162.0 114:680.0 116:88.0 117:1522.0 118:355.0 123:47.0 124:228.0 126:12.0 12				21624	35328	41785	34109	36776	73768	44246	72731	31149	60672	25315	58366	38326	50549	67982	44428	38871	59294	43838	37940	50792	75175	46149	47470	33154	31804	31493	20787	44638	65195	51581	84792	26100	50679	67144	76292	40736	66681	23500	34914	55468	14957
281216	605436	144	281216	86:300.0 87:176.0 88:801.0 89:9536.0 90:728.0 91:534.0 94:275.0 95:17.0 96:3.0 97:309.0 98:13620.0 99:1973.0 100:5251.0 101:2519.0 102:2159.0 103:14686.0 104:1725.0 105:690.0 106:208.0 108:82.0 109:1.0 110:2960.0 111:175.0 112:225.0 113:354.0 114:1468.0 1				6160	9059	3709	5153	2188	5157	2020	8565	7637	2445	10533	1052	6475	4246	1100	3979	747	9248	6768	904	3664	3292	9796	9512	1534	2157	6947	1495	2285	881	7800	6996	7996	667	2129	6259	6644	1008	5582	8820	1721	12609
3,6-anhydrogalactose	589230	231	200841	85:115.0 86:62.0 87:96.0 88:57.0 89:1274.0 90:100.0 93:35.0 94:14.0 95:609.0 96:59.0 97:26.0 98:115.0 99:54.0 100:125.0 101:657.0 102:73.0 103:1380.0 104:89.0 105:477.0 106:32.0 108:18.0 110:27.0 111:52.0 112:29.0 113:14.0 114:9.0 115:59.0 116:117.0 117:9	441040	C06474		3157	2745	3217	2740	3245	4448	2392	3883	2090	3279	2380	3358	2317	2389	4735	3230	2816	3152	2412	2359	2625	4637	3408	3517	2892	2069	2045	2200	2666	3535	3285	3807	1933	2639	4022	3937	2383	3188	1801	2210	2684	1823
281257	612012	231	281257	86:290.0 89:1426.0 90:263.0 94:51.0 100:272.0 101:848.0 102:77.0 103:636.0 105:154.0 112:151.0 114:150.0 115:5.0 116:926.0 117:2955.0 118:256.0 119:221.0 128:448.0 129:771.0 131:190.0 133:1889.0 142:127.0 143:207.0 147:6379.0 148:475.0 149:917.0 150:67.0				7342	6512	6382	9020	10210	9531	6444	9546	5174	7159	1673	7277	6858	6608	8892	6735	6930	7316	5338	7161	6555	10316	7022	8053	6950	5235	6336	5605	6411	8503	7349	10824	6156	8329	8626	9932	5960	7250	5235	7608	6293	6452
225555	685994	266	225555	87:1.0 91:196.0 92:187.0 93:814.0 99:33.0 104:49.0 107:1850.0 109:28.0 110:668.0 111:52.0 115:16.0 116:139.0 121:353.0 122:42.0 123:121.0 124:10.0 125:5.0 132:6.0 133:179.0 136:404.0 140:147.0 141:8.0 144:66.0 145:13.0 149:3673.0 150:435.0 151:20.0 153:1.				3533	4565	11100	3208	2965	4697	21205	.	4319	2254	.	257	874	4767	25955	6306	5744	15485	7996	967	7768	2209	2953		9954	2922	1719	1567	13068	3776	5333	2198	7644	11799	20376	2059	15025	16994	10418	7701	21297
231713	692917	244	231713	85:646.0 86:747.0 87:421.0 89:4441.0 90:420.0 91:31.0 93:298.0 94:223.0 96:715.0 100:1059.0 101:2161.0 102:1020.0 103:7719.0 104:826.0 105:1257.0 110:857.0 111:174.0 112:1080.0 113:723.0 114:551.0 115:228.0 116:802.0 117:5763.0 118:551.0 119:588.0 121:23.				605	512	404	628	841	794	353	667	651	214	181	317	387	383	480	572	405	513	403	452	496	573	587	383	557	386	430	396	448	606	753	690	561	378	634	675	419	449	485	403	258	386
213304	930533	156	213304	89:248.0 90:69.0 91:28.0 95:440.0 96:188.0 97:97.0 103:1343.0 107:183.0 108:73.0 111:54.0 112:34.0 113:20.0 114:83.0 115:22.0 116:156.0 117:597.0 118:64.0 121:10.0 125:11.0 126:11.0 127:38.0 128:186.0 129:151.0 130:24.0 137:20.0 140:34.0 142:177.0 143:76.				2493	1348	2120	2006	2005	1937	1474	2201	1307	1998	1676	2090	1700	912	2283	2839	2386	1884	1572	2688	1971	2406	1158	2495	2598	1686	1749	1110	2464	3764	1700	1634	609	1793	3206	1900	2203	1625	1088	2010	975	2267
glucuronic acid	666743	333	216853	85:786.0 86:1669.0 88:197.0 89:11739.0 90:975.0 91:399.0 92:12.0 94:246.0 96:65.0 97:12.0 98:285.0 99:1033.0 100:2028.0 101:1406.0 102:3031.0 103:6488.0 104:821.0 105:6545.0 106:618.0 107:193.0 108:18.0 109:9.0 110:58.0 111:365.0 112:389.0 113:464.0 114:2	94715	C00191		2586	1451	1821	1775	4412	1481	2035	2576	1861	1530	2910	3384	1365	2467	2593	2867	2405	2213	9106	2303	2963	2633	1004	1194	2765	7773	1707	2624	2345	2089	2636	6696	2193	2215	5318	2880	5566	1407	1711	3996	2608	3797
227367	995564	217	227367	85:58.0 89:4129.0 90:254.0 93:320.0 95:134.0 97:144.0 99:157.0 100:270.0 101:500.0 102:964.0 103:15064.0 104:1382.0 105:1140.0 108:116.0 110:342.0 111:81.0 113:321.0 114:242.0 115:180.0 116:432.0 117:5133.0 118:812.0 119:990.0 121:50.0 124:122.0 128:231.0				618	795	663	648	1183	1027	678	518	544	589	434	822	591	328	827	1071	706	554	370	324	645	994	518	923	822	387	197	477	543	558	466	773	653	431	925	378	541	706	361	440	547	859
sucrose	913309	271	223525	89:358.0 95:80.0 99:163.0 100:35.0 101:375.0 102:178.0 103:6261.0 104:347.0 105:186.0 109:338.0 110:58.0 111:2.0 113:276.0 114:31.0 116:238.0 117:1417.0 118:41.0 119:193.0 128:70.0 129:5055.0 130:773.0 131:916.0 132:23.0 133:1123.0 134:19.0 135:273.0 139:	5988	C00089		564	1016	551	574	1201	706	17821	3375	344	862	254	948	319	576	434	1911	290	443	428	418	2834	565	1130	552	844	2273	457	1621	395	497	493	1428	5515	8452	1992	788	4593	130	607	632	419	777
236890	628019	217	236890	85:385.0 87:246.0 88:193.0 89:5272.0 90:307.0 91:499.0 93:570.0 94:323.0 98:1194.0 99:318.0 100:1950.0 101:1353.0 102:375.0 103:47613.0 104:4318.0 105:2249.0 106:100.0 107:265.0 110:4.0 111:214.0 112:46.0 113:414.0 114:1114.0 115:414.0 116:346.0 117:6041.				12053	16383	19705	15523	17445	39503	62260	38097	14500	37963	13362	27624	29331	27469	32188	20334	18807	11378	19371	18439	22733	35085	43076	24977	17847	14836	16934	10750	123568	31991	23546	47748	31628	24597	32016	50981	20061	31165	14567	16405	29120	8877
glucose	657634	160	270055	85:487.0 86:788.0 87:442.0 88:970.0 89:33820.0 90:1191.0 91:2305.0 92:51.0 93:2409.0 94:26.0 95:157.0 96:7.0 97:251.0 98:169.0 99:1139.0 100:1384.0 101:2869.0 102:1535.0 103:36279.0 104:2465.0 105:12042.0 106:1148.0 107:3489.0 109:40.0 110:160.0 111:450.0	5793	C00031		1227718	1435819	1745880	1765961	2204497	1652178	1453912	1604567	1402404	1548713	1427382	2080706	1461862	2652298	2152955	1502785	1762717	1539402	1460008	1716844	1383706	2022011	1370661	1576607	1946425	1487404	1386558	1704912	1507669	1851648	768967	1565260	1200680	1916713	1827356	1761139	1510052	1913687	2746732	1643233	1318799	1517477
heptadecanoic acid	750645	117	200398	85:187.0 86:54.0 89:175.0 90:1.0 91:361.0 92:175.0 93:183.0 94:2.0 95:381.0 96:39.0 97:330.0 98:279.0 99:150.0 101:110.0 102:6.0 103:220.0 104:21.0 105:252.0 106:25.0 107:46.0 109:123.0 111:229.0 112:81.0 113:22.0 115:43.0 116:481.0 117:7486.0 118:650.0 1	10465	n/a		19566	15079	16491	12668	16024	20417	14265	12787	12748	19151	11912	16535	16420	19118	22193	18129	14651	13055	23432	17858	22540	19827	17166	18129	18357	12710	11395	15136	16099	20439	22754	13069	80302	13133	15359	17584	11098	16286	13544	16110	13996	15779
inulobiose 2	930708	204	202729	85:237.0 86:20.0 87:272.0 88:85.0 89:393.0 90:32.0 95:252.0 97:84.0 98:3.0 99:228.0 100:11.0 101:1940.0 102:349.0 103:4140.0 104:440.0 105:154.0 109:112.0 110:2.0 111:110.0 113:329.0 114:20.0 115:439.0 116:1067.0 117:15381.0 118:1758.0 119:807.0 120:37.0	439552	C01711		1898	1347	2086	1358	3878	1670	1171	1476	1170	1089	1249	1651	748	1240	2021	1846	1246	1360	1157	1296	1184	2013	1111	1727	1523	2280	1115	1406	1163	1879	2793	1699	1075	1375	1124	2769	1344	1178	1212	2563	1065	1211
leucine	345953	158	199607	85:195.0 86:172.0 87:11.0 88:96.0 91:93.0 92:107.0 93:199.0 94:21.0 95:30.0 96:27.0 97:45.0 98:20.0 99:87.0 100:548.0 101:35.0 102:1130.0 103:105.0 104:50.0 105:3.0 106:36.0 107:213.0 108:109.0 109:5.0 110:75.0 111:9.0 112:18.0 113:13.0 114:40.0 115:102.0	6106	C00123		267344	149971	156139	158508	224349	219692	121286	53821	120941	170255	92089	194231	145872	139053	268641	137157	252160	.	84620	167605	181103	143757	120336	105783	260037	123432	110472	264554	215108	268628	303462	158259	86416	163112	120274	249840	110392	208583	87702	78460	120675	165806
223402	345709	158	223402	85:2798.0 87:3114.0 88:132.0 89:2056.0 90:679.0 91:2501.0 92:828.0 93:2241.0 94:538.0 95:1133.0 96:894.0 97:453.0 98:1524.0 99:1741.0 100:6744.0 102:30094.0 104:1923.0 105:5003.0 106:1309.0 107:3829.0 108:377.0 109:1351.0 110:848.0 111:12.0 112:410.0 113:				267578	150200	156398	158786	225960	219933	121070	53624	120758	171128	91111	195059	145655	136381	268900	137392	252407	127054	84398	167395	181328	143560	120591	107695	260295	123216	110723	264859	215305	268818	303729	158453	86239	163961	120511	249673	110121	208868	87401	78249	120487	165554
281229	986303	310	281229	89:57.0 103:36.0 105:6.0 113:51.0 117:42.0 120:268.0 121:180.0 126:10.0 135:106.0 154:1.0 156:64.0 174:17.0 179:233.0 180:30.0 184:3.0 191:27.0 192:352.0 193:865.0 194:138.0 195:294.0 204:67.0 206:29.0 207:442.0 208:423.0 209:212.0 217:135.0 221:567.0 224				1069	1179	1320	1867	863	1696	1214	1578	980	1580	1100	2019	1170	964	1366	1447	1714	1592	1274	1731	1449	1807	4100	1537	1474	1050	1135	1395	1398	1709	1286	1348	1772	5507	2255	1601	1009	1910	993	1029	1549	1575
2-hydroxybutanoic acid	258175	131	199800	85:149.0 86:7.0 87:71.0 88:31.0 89:19.0 91:405.0 92:19.0 93:2.0 95:123.0 97:12.0 99:46.0 100:6.0 101:97.0 103:112.0 104:25.0 105:164.0 106:3.0 107:19.0 108:4.0 109:27.0 110:14.0 112:2.0 115:201.0 116:35.0 117:111.0 118:6.0 119:642.0 120:29.0 121:1.0 123:2	94318	C05984		153532	136311	153017	117141	119568	130293	191113	.	169986	178924		166516	155728	107259	214854	112702	144848	147823	88136	126169	171106	170490	185378		303067	51669	105758	82420	99249	235362	379303	62828	110055	117407	92411	153800	145579	171513	135959	142664	134217
223506	802836	246	223506	86:157.0 101:47.0 103:4.0 114:114.0 117:59.0 127:156.0 132:12.0 143:4.0 158:38.0 182:6.0 197:22.0 205:1.0 207:28.0 208:9.0 217:45.0 221:15.0 226:48.0 230:9.0 233:3.0 246:3175.0 247:557.0 248:217.0 259:10.0 271:1.0 272:30.0 279:19.0 280:3.0 281:39.0 284:4.				6212	7311	12015	4766	6659	5225	4448	8886	5029	7692	4208	5676	3706	3960	5392	5910	4784	6637	7119	6158	4975	5167	3402	9404	4538	4964	5109	4133	3825	5777	6944	4507	7119	7473	5529	6243	4694	5511	4361	8467	5611	7301
taurine	557250	326	234595	85:2682.0 86:34189.0 87:3463.0 88:1176.0 89:1034.0 90:695.0 91:5.0 93:1464.0 95:790.0 97:788.0 98:2446.0 99:2349.0 100:60731.0 101:6086.0 102:5145.0 103:1284.0 104:490.0 107:1220.0 110:1333.0 111:651.0 112:4906.0 113:4539.0 114:7587.0 115:2701.0 116:2604.	1123	C00245		5779	3678	5676	8266	6958	5275	2874	971	3149	3702	3184	7531	2130	6835	5536	5271	4302	4716	7434	4491	13292	6450	2285	2843	3179	5527	2462	5993	7508	4016	6013	9196	1675	8049	8923	4188	6573	7394	2467	4009	32865	4316
arachidic acid	856486	117	241206	85:5859.0 88:228.0 89:5274.0 90:1214.0 91:10782.0 92:4083.0 93:8557.0 94:2444.0 95:13392.0 96:841.0 97:9267.0 98:10027.0 99:2162.0 101:131.0 104:171.0 105:8363.0 106:1744.0 107:2678.0 108:3904.0 109:4920.0 110:40.0 111:6308.0 112:3828.0 113:6.0 115:909.0	10467	C06425		50062	12711	15755	13723	19637	8771	69025	11212	10792	16146	1297	17582	2256	14709	15706	15633	3504	10617	10309	8481	11046	17279	11123	15987	10645	20008	10769	4458	12476	12578	16503	9573	54922	15853	14082	12392	13346	14261	9948	13777	13116	11844
224552	494599	239	224552	85:16.0 86:4557.0 87:1994.0 88:693.0 90:61.0 91:161.0 92:28.0 93:185.0 94:19.0 95:523.0 96:297.0 97:1228.0 98:624.0 100:2660.0 101:879.0 102:95.0 103:18.0 104:175.0 107:1012.0 108:250.0 109:156.0 110:500.0 111:1002.0 112:561.0 114:355.0 115:169.0 116:75.0				496	539	589	972	1027	887	892	633	570	759	480	1005	584	646	647	835	1018	334	520	481	388	1013	707	886	543	827	606	623	628	761	412	384	13851	1219	943	510	288	629	805	474	673	519
274531	706670	331	274531	85:420.0 86:377.0 87:28.0 89:597.0 91:135.0 93:193.0 94:121.0 95:419.0 96:671.0 97:450.0 98:664.0 99:801.0 100:2368.0 101:918.0 102:365.0 103:2034.0 104:123.0 105:519.0 106:13.0 108:180.0 109:427.0 110:303.0 111:499.0 112:246.0 113:313.0 114:312.0 115:406				2134	1762	2999	2208	1818	2482	2048	2403	2178	2340	1983	3207	2365	2664	2572	2251	2111	2391	1856	2240	2229	2921	2014	2633	2901	2381	2361	1971	2283	2580	2483	2167	10589	2246	2652	2689	2054	1989	1334	2764	1711	2744
218761	336333	116	218761	85:1495.0 86:3455.0 87:355.0 88:537.0 89:5409.0 90:1016.0 91:186.0 92:20.0 93:212.0 94:363.0 95:324.0 96:7660.0 97:1264.0 98:3897.0 99:965.0 100:4389.0 101:1634.0 102:733.0 103:433.0 104:188.0 109:28.0 111:180.0 112:898.0 113:344.0 114:1464.0 115:633.0 11				115480	55675	35278	39869	207249	101735	31248	44511	59493	27082	62716	154973	30155	70789	180087	39019	176842	56677	63444	77309	53330	33713	56921	29691	166308	24095	37264	195076	185836	136631	145642	79336	94584	231936	30046	210339	38462	170158	17305	45951	74285	73400
2-deoxyerythritol	422939	103	211437	90:1.0 96:2.0 103:459.0 104:24.0 105:7.0 119:1.0 129:37.0 131:8.0 133:28.0 147:102.0 148:2.0 149:1.0 155:1.0 156:1.0 189:4.0 203:2.0 208:1.0 219:46.0 220:5.0 221:2.0 225:1.0 236:1.0 245:1.0 258:2.0 291:1.0 297:1.0 306:2.0 333:1.0 335:2.0 336:1.0 345:2.0 3	18302	n/a		7432	8820	10221	8237	10059	15533	10470	15373	7639	14464	9290	10984	7927	12177	13436	11877	10406	10722	11927	10039	12061	13236	11870	10508	6921	9679	7177	9096	10323	13968	10131	15537	9098	10737	14021	14395	11674	12074	6790	10861	14758	12255
linoleic acid	777102	337	199240	85:539.0 86:198.0 87:84.0 88:115.0 89:404.0 90:26.0 91:2027.0 92:324.0 93:2910.0 94:2158.0 95:4815.0 96:2863.0 97:1449.0 98:363.0 99:311.0 100:44.0 101:132.0 102:9.0 103:8.0 104:66.0 105:910.0 106:291.0 107:1535.0 108:1155.0 109:1950.0 110:1406.0 111:542.	5280450	C01595		14366	3151	7071	5170	7138	11695	5340	4478	7390	11530	5239	6878	8681	11609	16087	11698	3922	5355	19695	7715	20464	10274	6224	9483	10529	4464	3834	13475	9816	7845	14247	10067	8463	9986	6429	6925	2969	7895	4338	6197	6329	5327
281143	617834	328	281143	85:86.0 86:326.0 88:60.0 89:253.0 93:163.0 95:610.0 96:6743.0 97:2113.0 98:265.0 99:270.0 100:1409.0 101:533.0 102:397.0 103:1591.0 110:276.0 112:69.0 113:473.0 114:357.0 116:417.0 117:293.0 122:73.0 124:157.0 125:257.0 127:35.0 128:396.0 129:216.0 130:85				3116	2079	3846	3714	711	1708	4518	1675	1849	3010	2227	4383	2926	2990	3217	5085	1951	4340	1238	2154	4745	3421	2453	2919	1460	1120	2952	2367	2493	5833	3651	4441	1192	5771	4388	5660	1973	5551	1979	1219	3392	2521
palmitic acid	711066	313	227993	85:417.0 86:40.0 87:201.0 89:75.0 93:219.0 95:782.0 96:115.0 97:416.0 98:554.0 99:149.0 100:92.0 101:33.0 105:247.0 107:38.0 109:208.0 110:66.0 111:130.0 112:105.0 114:45.0 116:728.0 117:13594.0 118:1183.0 119:294.0 123:10.0 124:16.0 125:29.0 127:100.0 12	985	C00249		133613	80436	93949	66626	97407	104838	89948	66296	77351	112587	71326	86514	103602	100557	129257	117214	70513	62155	148817	92685	147857	103987	102297	100836	114275	77624	52128	103388	94383	90114	150800	82559	296727	85104	71458	99279	54165	98307	61125	60632	85187	85222
ornithine	527822	142	202829	85:254.0 86:485.0 88:721.0 89:1363.0 92:45.0 94:28.0 95:63.0 96:358.0 97:703.0 98:933.0 99:328.0 100:2198.0 101:509.0 102:6737.0 103:1070.0 104:759.0 105:138.0 106:44.0 107:9.0 108:201.0 110:280.0 111:224.0 112:387.0 113:303.0 114:655.0 115:2669.0 117:716	6262	C00077		8756	5053	9236	3762	11425	3849	2560	3002	4283	7231	3788	6856	5368	5863	11975	6568	19132	3040	1888	7979	5345	3213	3009	3222	20540	4731	7478	18959	13732	11711	7663	11314	2382	20357	2337	17298	2971	11543	3135	1908	2330	7555
227322	364439	142	227322	85:111.0 86:177.0 89:850.0 90:449.0 91:234.0 92:16.0 93:132.0 94:642.0 95:3.0 96:263.0 97:134.0 99:59.0 100:694.0 101:227.0 102:287.0 104:309.0 107:860.0 108:511.0 109:184.0 110:4273.0 111:434.0 112:116.0 113:289.0 114:1537.0 115:778.0 116:380.0 119:2.0 1				189089	142443	169900	84060	247078	189218	130931	46796	119778	188411	37356	147603	61256	129335	356560	131691	296758	106237	73182	314477	134559	163423	31540	105147	203051	112899	94057	245232	286637	243390	237155	194498	52169	252690	100600	266519	106522	222902	71958	75668	150899	116739
proline	364232	142	199611	85:2.0 88:15.0 91:98.0 92:102.0 95:3.0 96:5.0 98:3.0 99:10.0 100:74.0 101:25.0 107:26.0 110:19.0 113:5.0 115:2.0 117:33.0 118:16.0 126:28.0 127:10.0 128:9.0 130:1.0 131:13.0 132:12.0 133:2.0 134:56.0 135:2.0 136:9.0 140:21.0 141:4.0 142:3396.0 143:428.0 1	145742	C00148		188930	142379	167400	84441	246505	188634	130743	46983	119507	188239	38103	147348	61417	129164	354339	131621	295384	106099	72967	314320	134475	163323	31572	105096	200702	112797	94050	245094	285841	243231	236967	194323	52755	250227	100172	266360	106579	222635	73737	76248	150758	118325
2-ketoisocaproic acid	310629	200	213388	85:175.0 86:236.0 89:6303.0 90:491.0 91:173.0 92:17.0 93:3.0 95:42.0 96:4.0 98:729.0 99:4133.0 100:709.0 101:68.0 103:3.0 108:22.0 110:2701.0 111:155.0 112:64.0 113:101.0 114:822.0 115:2454.0 116:492.0 117:184.0 118:60.0 126:196.0 127:16.0 128:10.0 137:3.	70	C00233		8397	5361	7285	8844	5168	7011	11159	4707	6336	10660	5687	7051	4218	6103	8502	4540	7150	5212	3605	6342	4628	7329	8337	6564	9880	3586	5760	6584	5878	6483	9852	3029	6205	5472	6316	4906	3599	6502	4991	5829	4026	3850
226935	983996	310	226935	86:201.0 89:679.0 100:482.0 101:483.0 102:169.0 103:2039.0 108:109.0 114:60.0 116:260.0 117:920.0 120:335.0 121:4.0 125:42.0 129:1129.0 130:105.0 135:82.0 137:35.0 142:125.0 143:189.0 144:140.0 146:24.0 147:1137.0 153:35.0 154:101.0 156:655.0 157:126.0 15				25203	30114	34071	50575	22197	48566	33590	50035	20433	54379	28770	61674	31952	28368	31804	39094	49867	45359	28772	46807	38593	43913	21412	46796	33893	22001	31165	31993	38797	48141	28345	38366	21980	37234	60297	41019	29185	54290	20477	21768	41776	35149
2-oxogluconic acid	542152	201	228269	85:3577.0 86:1819.0 87:4277.0 88:2167.0 89:13923.0 90:601.0 91:1818.0 93:1020.0 94:2196.0 95:474.0 97:531.0 98:1300.0 99:2124.0 100:5704.0 101:14351.0 102:2176.0 103:88060.0 104:9019.0 105:5728.0 107:459.0 109:154.0 110:2496.0 111:981.0 112:397.0 113:2134	3035456	C00629		1111	349	388	1028	624	884	1155	1326	849	872	1185	1315	1286	353	822	1041	296	919	649	867	762	726	1352	1390	658	937	1260	456	968	725	905	1389	2843	647	186	1038	888	906	1018	1112	741	1407
uridine	856953	258	213127	85:2472.0 86:1478.0 87:1633.0 88:576.0 89:3553.0 90:421.0 91:253.0 92:172.0 93:316.0 94:534.0 95:1117.0 96:2472.0 97:1997.0 98:1743.0 99:16654.0 100:10368.0 101:8412.0 102:3218.0 103:20005.0 104:2189.0 105:1295.0 106:340.0 107:121.0 108:303.0 109:830.0 11	6029	C00299		1153	832	617	797	1111	880	1425	796	928	1172	1018	1190	999	1214	1312	793	727	1045	896	1623	971	1798	546	1027	2136	1754	845	1493	1339	1035	1000	809	970	1215	1135	983	813	1074	830	1289	834	1586
phosphoethanolamine	604454	100	199628	85:49.0 86:906.0 87:125.0 88:9.0 89:44.0 90:10.0 91:10.0 92:46.0 93:8.0 96:1.0 97:1.0 98:2.0 99:6.0 100:2798.0 101:243.0 102:104.0 103:48.0 104:16.0 105:4.0 106:6.0 107:56.0 108:2.0 110:18.0 112:3.0 113:28.0 114:1229.0 115:718.0 116:154.0 117:103.0 118:25	1015	C00346		951	1807	2845	1277	988	795	2301	1647	1531	2166	1929	2021	3707	2908	2222	1422	2259	2891	4137	1880	2894	2353	2192	2056	1971	2081	2966	477	1146	1419	2397	2402	2276	1513	2122	1158	2078	2509	3794	2629	3209	2859
tocopherol gamma	1026222	223	202089	85:38.0 87:1.0 88:3.0 90:2.0 91:84.0 92:6.0 93:9.0 95:56.0 96:10.0 97:5.0 100:8.0 101:15.0 102:2.0 103:10.0 104:31.0 105:86.0 106:15.0 107:6.0 108:2.0 109:49.0 113:15.0 114:1.0 115:6.0 116:18.0 117:6.0 118:3.0 119:21.0 120:16.0 121:20.0 123:12.0 124:4.0 1	92729	C02483		10592	7324	5827	11181	12544	14904	3319	12265	6519	9398	6973	9833	7292	3833	10358	9007	3732	9620	14072	10695	7656	9924	7733	12591	10196	7080	6978	14630	12754	12338	22669	8912	6599	30309	2202	12342	6603	10215	2887	13877	9867	6127
cystine	804143	218	223490	86:679.0 87:225.0 88:10.0 90:102.0 91:35.0 98:43.0 100:9221.0 101:1180.0 102:559.0 103:367.0 105:127.0 106:13.0 113:26.0 114:903.0 115:2311.0 116:1566.0 117:381.0 118:111.0 120:264.0 124:51.0 128:36.0 129:197.0 130:564.0 131:766.0 132:2303.0 133:762.0 134	67678	C00491		35220	27455	41804	25898	55905	60094	34536	34290	25496	38592	36480	48953	32198	18154	59962	37952	45838	37757	37624	49190	40520	35543	19046	32652	41601	39613	42573	47571	47872	47978	50686	42854	14991	41092	40788	53796	39183	42293	2686	41322	50139	38130
shikimic acid	607609	204	228066	85:1987.0 86:823.0 87:1770.0 88:761.0 89:1648.0 90:166.0 91:6038.0 92:1816.0 93:9224.0 94:1660.0 95:3106.0 96:1762.0 97:1863.0 98:648.0 99:2431.0 100:64.0 101:7803.0 102:888.0 103:10982.0 104:1139.0 105:6489.0 106:920.0 107:1730.0 108:646.0 109:2726.0 110	8742	C00493		2002	1519	8159	2247	4821	1940	115244	1444	1494	2333	2654	3207	9375	1699	2954	1726	2823	1118	2249	2270	1918	3118	4054	3306	6664	4861	3065	5658	2281	2423	1264	1617	30850	1945	2408	1676	1485	2022	2562	1036	1876	10484
xylose	542808	103	200500	85:565.0 86:845.0 87:790.0 88:535.0 89:6861.0 90:592.0 91:618.0 92:229.0 93:81.0 94:131.0 95:82.0 96:74.0 97:71.0 98:285.0 99:592.0 100:1939.0 101:2517.0 102:1082.0 103:47280.0 104:4533.0 105:4103.0 106:317.0 107:207.0 108:45.0 109:43.0 110:128.0 111:241.	6027	C00181		4956	4925	5338	4935	4501	4688	7033	7246	5539	6165	5819	7660	6441	6994	4959	5468	4233	5664	5199	3818	5641	4020	7262	5304	4788	2528	5817	3967	4635	3903	5535	4049	10619	5933	4121	7139	5322	5343	6156	6817	5881	6821
histidine	663393	154	231328	85:1868.0 86:3594.0 88:396.0 91:362.0 92:521.0 93:126.0 95:224.0 98:1173.0 100:5910.0 101:1646.0 107:5940.0 108:911.0 109:259.0 110:4528.0 112:679.0 114:69.0 120:5.0 121:2.0 123:79.0 124:438.0 125:360.0 126:2079.0 127:3094.0 132:1111.0 137:205.0 138:274.0	6274	C00135		66113	53771	60934	83652	55388	53159	44793	54465	49208	55154	58060	67771	60412	44248	56008	55203	60543	53855	45624	66684	47331	58838	35226	60566	74013	48994	57321	84527	54268	54503	60711	49043	31972	43651	66046	55188	44581	54120	62944	46713	38553	109825
273236	1108221	311	273236	90:110.0 94:1.0 95:59.0 103:430.0 104:58.0 109:108.0 114:47.0 116:43.0 118:113.0 119:220.0 120:174.0 121:22.0 122:20.0 123:36.0 124:61.0 125:48.0 129:1639.0 130:541.0 131:210.0 136:8.0 141:25.0 142:200.0 145:143.0 151:4.0 153:26.0 154:34.0 155:221.0 156:2				149	264	231	99	964	177	549	78	92	72	413	253	84	172	183	43	5690	163	1586	25788	668	199	1141	306	102	441	493	264	327	373	244	331	60	101	106	91	1121	88	584	316	462	64
serine	394650	204	213294	85:4149.0 86:13315.0 87:6992.0 88:15150.0 89:10502.0 90:1587.0 91:745.0 92:179.0 93:337.0 94:83.0 95:182.0 96:273.0 97:332.0 98:3409.0 99:2717.0 100:178441.0 101:28554.0 102:14111.0 103:31730.0 104:3916.0 105:4100.0 106:636.0 107:226.0 108:66.0 109:73.0 1	5951	C00065		115324	103758	123073	111862	154424	108704	75960	54678	72403	133535	68348	135680	114211	98455	196150	88828	122582	94690	58730	108621	111567	143886	88406	95802	144154	84899	86508	167175	162860	150346	113438	140835	150880	112528	101540	121639	81600	109660	46313	63207	115177	118060
204465	474367	140	204465	86:178.0 87:47.0 88:69.0 90:260.0 91:578.0 93:36.0 94:4.0 95:1.0 96:12.0 97:164.0 98:718.0 99:62.0 100:197.0 101:33.0 102:75.0 103:3.0 104:157.0 107:25.0 108:17.0 109:1.0 110:221.0 111:41.0 112:50.0 113:76.0 114:53.0 115:142.0 116:122.0 121:1.0 123:5.0 12				1168	3252	1169	1366	1315	2054	1094	2600	22821	477	3830	1956	2390	1538	998	1384	14953	4270	1888	411	2341	1717	4033	4669	1790	1516	2660	1525	414	893	1916	2043	4062	17913	807	1139	2327	736	1891	2281	1276	5815
217797	655403	273	217797	85:567.0 86:1360.0 87:971.0 88:870.0 89:11394.0 90:1049.0 91:693.0 92:64.0 93:126.0 94:163.0 95:34.0 96:351.0 97:550.0 98:583.0 99:1218.0 100:1924.0 101:5846.0 102:1176.0 103:9757.0 104:961.0 105:2627.0 106:393.0 107:172.0 108:15.0 109:86.0 110:330.0 111:				7277	7717	13362	9822	9404	9768	6611	7450	6591	9307	7360	12890	5585	7042	9147	7627	6614	6818	8865	10164	7710	9251	6055	8071	7532	8941	6030	9258	7409	7770	9392	6632	3664	8779	9239	8019	8649	9680	9041	8783	6448	7356
cysteine	499495	220	223529	85:121.0 86:701.0 90:5.0 91:8.0 99:42.0 100:3938.0 101:418.0 102:407.0 109:65.0 110:215.0 111:289.0 112:341.0 113:261.0 114:357.0 115:440.0 116:751.0 117:18.0 119:105.0 124:17.0 127:32.0 128:839.0 129:223.0 130:214.0 131:935.0 132:988.0 133:9.0 134:155.0	594	C00097		39475	27548	18977	26093	23541	21910	22160	17060	14069	28613	18701	31417	23508	25666	36519	25861	38019	19532	14125	31919	17458	26903	10153	19011	23091	18218	23917	24711	23187	24910	31109	23299	7997	36712	16142	25701	30221	24497	10196	25317	18359	19379
adipic acid	475399	111	218815	85:15.0 86:93.0 94:8.0 95:78.0 96:4.0 99:123.0 102:79.0 107:140.0 109:4.0 111:2899.0 112:116.0 113:68.0 114:100.0 116:84.0 117:256.0 120:3.0 121:6.0 123:9.0 124:32.0 125:23.0 126:70.0 129:429.0 130:50.0 131:111.0 132:49.0 135:6.0 136:2.0 139:26.0 140:7.0	196	C06104		2480	2558	2606	2375	3041	1810	2877	2663	2071	3060	3703	3600	1974	2535	2083	3378	2630	1789	1451	2107	2356	3314	3038	4934	2996	3741	2521	2472	2745	1732	1920	1641	23568	3431	3590	1797	2296	2843	2350	1961	2215	6744
stearic acid	787358	117	199195	85:700.0 86:253.0 87:125.0 88:82.0 89:447.0 90:48.0 91:171.0 92:25.0 93:426.0 94:40.0 95:1020.0 96:117.0 97:1024.0 98:749.0 99:386.0 100:49.0 101:187.0 102:22.0 105:450.0 106:48.0 107:188.0 108:13.0 109:271.0 110:45.0 111:412.0 112:177.0 113:76.0 114:7.0	5281	C01530		887025	819253	701233	527959	796903	735799	641255	557505	476302	816586	534238	732262	749310	1001432	745307	708293	660865	506723	620735	751336	965176	910891	827836	712951	820456	720656	452012	841537	750450	609607	995860	513138	1276793	645215	604254	728648	564548	742820	736508	564864	693588	716815
valine	313224	144	199605	85:48.0 86:132.0 87:8.0 88:9.0 89:2.0 90:21.0 91:58.0 92:93.0 93:1.0 97:102.0 98:14.0 99:2.0 100:836.0 101:92.0 102:11.0 103:76.0 104:20.0 105:42.0 106:2.0 107:49.0 109:2.0 110:18.0 111:13.0 112:18.0 113:8.0 114:87.0 115:99.0 116:9.0 117:113.0 118:31.0 11	6287	C00183		609022	340080	357663	414224	464009	430513	350496	242784	293813	409415	272863	487914	299921	328604	555962	380238	683494	331843	216263	424682	324166	304001	328559	281575	517456	333208	306123	543246	400430	555441	550819	388063	225592	456314	407241	474688	327000	527806	210464	270751	369605	375341
239843	890991	290	239843	86:149.0 88:2.0 90:83.0 93:5.0 94:298.0 95:31.0 96:170.0 97:867.0 98:525.0 99:102.0 100:77.0 101:286.0 102:33.0 103:4828.0 104:534.0 105:28.0 109:31.0 110:265.0 111:218.0 112:4.0 114:253.0 115:77.0 116:993.0 117:2204.0 118:309.0 122:84.0 123:13.0 124:89.0				649	596	822	765	460	413	1099	550	455	316	746	4417	386	367	3475	5928	3504	631	870	4366	492	312	740	5851	5689	494	1169	318	387	2462	4971	639	847	2794	333	648	818	2916	636	823	1384	1713
myristic acid	634543	285	199929	85:416.0 86:210.0 87:140.0 88:111.0 89:675.0 90:120.0 92:132.0 93:183.0 94:22.0 95:657.0 96:62.0 97:455.0 98:384.0 99:309.0 100:253.0 101:342.0 102:103.0 103:393.0 104:2.0 105:426.0 106:30.0 107:104.0 108:4.0 109:155.0 110:23.0 111:174.0 112:80.0 113:55.0	11005	C06424		6537	5369	7144	4494	7976	6677	9350	4605	4644	7619	4948	7367	6056	6513	7199	7152	5401	3618	6939	7751	10022	6636	6099	7408	7744	5898	4206	7412	6542	5650	8299	5634	21566	7258	5233	6022	3776	6925	4065	4536	5291	5761
226845	795371	232	226845	85:235.0 86:235.0 99:99.0 100:374.0 101:92.0 102:89.0 103:1402.0 108:108.0 114:13.0 116:284.0 117:718.0 118:112.0 120:5.0 124:21.0 129:570.0 130:558.0 131:390.0 132:14.0 134:287.0 136:86.0 140:18.0 141:87.0 142:73.0 143:134.0 144:302.0 147:1796.0 148:70.0				2346	2561	3965	5555	3013	2177	1558	4447	5974	2124	2777	5600	5472	2608	3059	1883	2512	1600	2539	3401	3731	3664	6001	3700	3692	3392	2810	5201	3097	2871	2131	2312	4826	1659	2515	2140	2741	1546	3799	2087	2387	6225
alanine	243537	116	199651	86:338.0 87:58.0 88:38.0 89:51.0 94:193.0 95:163.0 96:74.0 98:5.0 99:16.0 100:675.0 101:170.0 102:149.0 103:505.0 104:54.0 105:49.0 106:2.0 108:4.0 109:43.0 110:115.0 111:143.0 114:92.0 115:220.0 116:11231.0 117:1549.0 118:416.0 123:15.0 128:108.0 129:28.	5950	C00041		403485	155931	348940	183690	274863	262693	529677	380900	518614	541005	310688	302138	201521	280996	421039	362165	1244514	381582	510053	1067538	219731	255018	277741	547973	380943	602188	170976	564015	229092	1024238	423750	255329	443110	773432	508579	387425	298845	535465	233427	576109	507444	609990
226922	696043	139	226922	85:1063.0 86:1308.0 87:399.0 88:787.0 89:865.0 91:63.0 94:35.0 95:307.0 97:795.0 98:3527.0 99:673.0 100:1924.0 101:1031.0 102:1112.0 103:2760.0 104:430.0 108:130.0 109:88.0 111:2132.0 112:744.0 113:1101.0 114:542.0 115:609.0 116:1261.0 117:1943.0 118:436.				7034	21196	2820	13941	3621	3285	895	14865	22920	1928	27346	3588	29234	1461	2059	3182	1304	22495	13653	3179	10159	6660	31314	6636	3313	4130	21583	6265	625	1528	2175	4363	24397	1096	6316	2258	17341	2645	17131	20291	1389	56853
methionine	483425	176	200533	86:21.0 88:3.0 90:8.0 92:12.0 95:10.0 100:164.0 101:1.0 102:9.0 103:70.0 104:5.0 105:26.0 106:4.0 107:16.0 110:25.0 112:1.0 113:3.0 114:41.0 115:3.0 127:6.0 128:694.0 129:60.0 130:54.0 132:10.0 134:7.0 139:4.0 143:1.0 147:79.0 148:18.0 149:2.0 150:2.0 158	6137	C00073		15764	13991	22211	20167	25329	20285	20774	.	19640	25343		20894	17734	17552	20357	18626	26701	13505	11574	17688	23065	20614	6869	.	24770	17589	14332	25551	25620	21979	15393	21976	15306	21634	16238	18780	16201	24688	11303	9516	19438
palmitic acid butyl ester	768467	129	206210	85:875.0 86:70.0 87:786.0 88:86.0 89:131.0 91:3.0 93:98.0 94:5.0 95:426.0 96:113.0 97:942.0 98:527.0 99:195.0 100:73.0 101:974.0 102:109.0 103:143.0 104:10.0 107:78.0 108:9.0 109:191.0 110:44.0 111:331.0 112:89.0 113:58.0 114:29.0 115:439.0 116:652.0 117:	8090			1246	720	1416	1189	.	1161	.	564	1042	.	1172	.	444	1606	.	.	.	1454	1555	.	1489	.	902	2487	.	.	1548	.	.	.	881	964	4037	.	.	766	1328	.	1133	1023	.	955
aconitic acid	586574	229	199256	86:8.0 87:1.0 89:718.0 90:77.0 91:111.0 92:36.0 93:163.0 95:142.0 96:105.0 97:405.0 98:76.0 99:30.0 100:23.0 101:155.0 103:184.0 104:9.0 105:44.0 106:26.0 109:4.0 110:15.0 111:45.0 112:31.0 113:52.0 114:3.0 115:25.0 116:330.0 117:660.0 118:63.0 119:92.0 1	309	C00417		452	522	913	891	2227	744	974	752	1223	980	682	1113	785	1133	2221	949	1720	607	1258	2065	1480	1510	570	1123	1907	1361	775	1125	1060	1576	884	740	892	1321	911	907	802	1230	923	940	1410	851
lignoceric acid	977850	117	199247	85:255.0 86:33.0 87:41.0 88:34.0 89:37.0 90:5.0 91:41.0 93:66.0 94:3.0 95:288.0 96:43.0 97:296.0 98:225.0 99:57.0 100:7.0 101:8.0 102:1.0 103:20.0 105:90.0 106:26.0 107:39.0 108:15.0 109:66.0 110:3.0 111:147.0 112:43.0 113:14.0 115:19.0 116:159.0 117:3640	11197	C08320		4915	3486	3771	4996	4356	3122	4672	3507	2249	2870	3741	3825	3554	3821	3975	3424	3303	3045	2686	4454	2982	3152	3538	5921	4684	3983	3820	4349	3722	3752	3238	3577	38247	4735	3141	4551	3900	3287	2799	3179	4274	5110
268506	301113	216	268506	85:307.0 86:714.0 87:1040.0 98:1322.0 99:1481.0 100:1639.0 101:420.0 102:102.0 103:248.0 105:324.0 107:867.0 109:106.0 110:635.0 112:151.0 113:595.0 114:4046.0 115:696.0 116:315.0 117:343.0 118:496.0 119:50.0 120:30.0 121:16.0 126:610.0 128:238.0 129:212.				2475	1645	2510	2563	2173	4509	3055	5566	1875	2895	2141	2359	1750	1266	2602	1804	1804	1893	2069	2011	1906	1159	1533	2146	1301	1125	2250	2248	908	960	1417	1808	2258	1097	2060	1620	2081	1855	1444	1928	2028	2211
alpha mannosylglycerate	633295	217	199788	85:181.0 86:15.0 87:193.0 88:25.0 89:817.0 90:31.0 91:53.0 92:18.0 93:16.0 94:1.0 95:2.0 96:5.0 97:225.0 98:3.0 99:149.0 100:25.0 101:1594.0 102:172.0 103:2896.0 104:202.0 105:151.0 106:9.0 107:14.0 109:3.0 110:4.0 111:132.0 113:300.0 114:37.0 115:397.0 1	443262	C11544		72302	122110	141107	120463	128663	247091	136568	106171	105976	62090	88383	208458	129633	173929	234399	155093	183072	54754	151843	140436	60806	262342	156321	166951	112057	109255	110801	72938	156199	222025	175440	277208	80549	244785	238603	253869	127497	125302	82318	117558	96657	205325
281131	1071318	371	281131	85:1140.0 87:815.0 88:346.0 89:1204.0 90:33.0 92:110.0 94:78.0 95:958.0 97:883.0 98:2114.0 99:308.0 100:347.0 101:1207.0 102:109.0 103:736.0 105:468.0 106:34.0 108:150.0 109:293.0 111:250.0 112:443.0 113:141.0 114:171.0 116:704.0 117:1592.0 118:93.0 121:1				1098	1186	1376	1754	1213	1927	1394	2332	1047	2083	1227	1788	1063	1167	1933	2305	1988	2211	1753	1918	1217	1544	1644	1960	1073	1299	1014	1507	1799	1788	2199	1161	672	2815	1719	1775	1390	2545	1020	980	2179	634
281108	857519	362	281108	85:228.0 86:1291.0 88:94.0 89:97.0 90:20.0 91:105.0 94:100.0 96:489.0 97:4699.0 98:422.0 99:383.0 100:2015.0 101:139.0 102:745.0 103:11001.0 104:968.0 105:106.0 111:750.0 112:84.0 113:234.0 114:896.0 115:2.0 116:2225.0 118:278.0 119:197.0 124:44.0 126:112				21253	2271	22561	16107	25630	8574	13952	2555	10830	9895	8547	29977	9984	1183	29663	10766	39882	8515	11233	37883	6106	10223	844	6992	67229	30358	12796	49940	22647	21363	10458	8139	11547	27208	9329	10203	9403	22132	322	7666	9110	15429
cysteine-glycine	715639	220	227594	86:555.0 88:246.0 91:545.0 98:58.0 100:2576.0 101:711.0 102:497.0 106:180.0 111:45.0 114:75.0 115:246.0 116:1217.0 117:850.0 118:37.0 120:19.0 127:7.0 128:7.0 129:276.0 130:700.0 132:1267.0 134:167.0 140:83.0 141:169.0 142:388.0 146:312.0 147:12.0 148:19.	439498	C01419		1595	949	921	943	3127	709	960	.	926	1688	.	1415	868	1350	1930	1387	1304	925	1475	1305	1100	2499	782	.	1891	1274	1098	2056	1161	1921	1800	647	838	1558	1416	1329	848	1414	753	1329	1247	.
asparagine	553791	116	199805	85:31.0 86:83.0 87:26.0 88:14.0 89:189.0 90:25.0 91:62.0 93:8.0 95:7.0 97:19.0 98:41.0 99:52.0 100:476.0 101:124.0 102:73.0 103:1415.0 104:121.0 105:124.0 106:6.0 107:3.0 108:5.0 111:4.0 112:8.0 113:21.0 114:105.0 115:111.0 116:1358.0 117:321.0 118:86.0 1	236	C00152		20365	20615	29536	29575	21513	26776	57485	18894	28391	33819	27713	26299	23890	20526	24323	31055	30057	24917	19060	24674	31503	25218	20089	30183	30691	20372	25407	24469	26395	26406	17418	31128	24937	23182	25733	20830	52381	25163	17702	17131	18319	85759
273450	462401	193	273450	85:44.0 87:90.0 88:113.0 91:747.0 99:72.0 101:915.0 103:415.0 105:487.0 106:80.0 110:414.0 113:27.0 114:389.0 115:625.0 116:217.0 117:1075.0 118:178.0 119:77.0 121:18.0 130:234.0 131:702.0 133:2071.0 134:467.0 135:210.0 137:17.0 143:149.0 145:171.0 147:89				2776	1704	2703	3344	2626	2349	2445	2205	1900	3123	4017	2739	2949	2276	4220	2962	2901	2448	4266	2737	2489	4052	3399	5145	4862	2193	3711	3418	2582	3196	3039	840	3749	4092	3343	4175	2499	4005	3372	2565	2378	4289
281112	802983	232	281112	86:371.0 87:4.0 88:64.0 89:782.0 90:14.0 97:580.0 98:1002.0 100:247.0 101:379.0 102:333.0 103:4389.0 104:367.0 106:12.0 111:151.0 114:456.0 115:160.0 116:1503.0 117:712.0 118:5.0 120:37.0 128:1747.0 129:100.0 130:512.0 131:101.0 132:178.0 133:79.0 142:3.0				20018	9761	12903	21894	15113	12771	10230	8855	13217	14823	3155	19788	7803	13698	25598	23652	19760	12049	18006	24721	11704	21407	5166	2102	21768	19610	7850	22983	14991	21008	27064	7006	9606	42360	19608	11453	10809	21863	10341	12039	17680	4025
kynurenine	769271	218	226885	85:381.0 86:276.0 87:326.0 88:173.0 89:159.0 90:265.0 91:224.0 92:126.0 93:220.0 95:87.0 97:439.0 98:62.0 99:241.0 100:1416.0 101:803.0 102:339.0 103:354.0 104:68.0 105:39.0 107:271.0 108:20.0 110:191.0 111:212.0 112:77.0 113:49.0 114:138.0 115:199.0 116:	161166	C00328		585	603	1070	863	1169	720	750	1008	548	953	718	496	462	582	906	1190	1620	924	662	787	1048	481	475	721	1039	839	1290	1204	1125	1006	765	638	671	735	780	1132	418	1154	900	902	1788	1514
281158	500924	240	281158	89:2298.0 91:2315.0 92:247.0 93:59.0 94:40.0 107:321.0 117:341.0 118:32.0 120:31.0 123:13.0 132:329.0 134:409.0 136:175.0 143:66.0 146:200.0 150:298.0 160:90.0 161:37.0 162:59.0 164:58.0 176:1297.0 177:88.0 184:5.0 190:1.0 192:99.0 199:219.0 208:47.0 212:				1350	452	1971	1565	2825	1355	1859	834	601	2051	573	3219	889	1419	2737	1285	2698	723	597	2255	1411	2294	508	713	2907	1523	808	2575	2107	2455	1123	1048	680	3434	2146	1775	663	3047	844	782	2113	416
phenylalanine	538016	218	217642	85:372.0 86:1654.0 87:562.0 88:174.0 89:1170.0 90:620.0 91:14880.0 92:2198.0 93:379.0 94:39.0 95:111.0 96:36.0 97:147.0 98:179.0 99:132.0 100:14537.0 101:2108.0 102:1308.0 103:2054.0 104:513.0 105:614.0 106:68.0 107:170.0 108:5.0 109:25.0 110:22.0 111:4.0	6140	C00079		57541	46816	76377	66660	75682	72561	57460	44492	59379	81992	48253	79910	58979	60160	70952	59781	90508	51526	42066	75982	67370	70627	48512	53459	83315	49877	56469	74555	69113	68685	68863	58591	53006	75915	67094	68478	56678	92414	49535	44998	85053	67640
levoglucosan	569799	204	199201	85:466.0 86:80.0 87:101.0 88:30.0 89:186.0 90:11.0 91:69.0 93:36.0 94:26.0 95:59.0 96:110.0 97:529.0 98:179.0 99:235.0 100:83.0 101:784.0 102:50.0 103:1304.0 104:116.0 105:98.0 107:28.0 108:28.0 109:81.0 110:142.0 111:297.0 112:66.0 113:414.0 114:113.0 11	2724705	n/a		1177	3120	1538	1418	4605	1737	2527	1838	2116	1227	2140	1705	1451	1536	1591	1914	7180	1170	9986	1417	2360	2574	1126	2947	1316	1332	1883	4163	1868	1990	1352	1534	2216	1440	1510	6513	2832	1507	1909	2103	1284	1679
227364	572785	314	227364	85:596.0 86:2113.0 87:420.0 88:1420.0 89:894.0 90:99.0 91:175.0 92:544.0 93:143.0 94:31.0 96:1.0 98:10.0 99:140.0 100:4984.0 101:1784.0 102:3973.0 103:8654.0 104:1232.0 107:828.0 108:917.0 109:39.0 110:12909.0 111:633.0 112:177.0 113:533.0 114:1691.0 115:				2299	3737	771	2652	760	2038	3669	3241	3473	1223	5139	1255	3362	1562	712	2580	535	3506	3364	830	1894	1312	4790	4163	872	1666	3669	1116	1044	588	1898	2165	4247	554	1234	2642	3092	854	2374	3378	1816	6782
239883	869427	290	239883	85:77.0 86:45.0 90:11.0 94:74.0 95:173.0 96:102.0 98:290.0 99:184.0 100:121.0 101:46.0 103:1453.0 104:58.0 107:140.0 108:21.0 109:149.0 111:91.0 112:27.0 114:53.0 115:7.0 116:184.0 117:22.0 118:34.0 120:8.0 123:24.0 125:12.0 126:77.0 128:5.0 129:1889.0 13				3389	3954	2933	3188	3662	1470	3230	4032	3751	3643	3225	3170	3004	2992	2740	3154	2072	2509	3243	3412	1768	2642	2842	3762	2915	3349	3661	2539	2168	1398	3397	2325	4601	2438	2593	2223	3894	1528	3411	5164	1676	4979
281200	816855	445	281200	85:57.0 88:11.0 89:91.0 93:3.0 96:428.0 97:632.0 98:156.0 99:201.0 100:96.0 101:4.0 102:2.0 103:272.0 104:26.0 108:89.0 110:178.0 111:6.0 112:26.0 114:371.0 115:7.0 116:25.0 121:2.0 124:164.0 125:1.0 128:96.0 129:164.0 135:1.0 138:79.0 139:1.0 140:67.0 14				1446	490	1268	2129	1126	1611	927	1016	414	1806	408	1311	707	493	1324	1452	1167	1246	1139	1311	1354	1661	526	514	1223	1185	526	1722	679	1842	986	955	953	2612	1364	943	841	2181	476	843	1944	463
228144	800275	290	228144	86:372.0 89:1212.0 98:109.0 99:11.0 100:1579.0 101:728.0 102:23900.0 103:8562.0 104:933.0 112:90.0 113:10.0 114:1145.0 115:292.0 116:615.0 117:840.0 118:20.0 124:35.0 128:5294.0 129:3745.0 130:1690.0 131:351.0 132:684.0 133:2409.0 134:192.0 140:120.0 142:				4045	1797	2451	4916	2547	2416	2177	1638	2334	2922	668	3769	1674	2686	5455	4502	4769	2279	3639	5184	2201	4527	849	497	4213	3737	1352	4742	2976	4700	5606	1458	1877	9324	4026	2172	1996	4558	1706	2314	3717	786
228583	302763	216	228583	85:1599.0 86:924.0 87:910.0 88:112.0 89:11719.0 90:840.0 91:801.0 94:232.0 95:18.0 96:3.0 98:1381.0 99:549.0 100:3232.0 101:22.0 103:2239.0 104:298.0 106:92.0 107:1290.0 108:694.0 109:170.0 110:1346.0 111:57.0 112:207.0 113:2453.0 114:1635.0 115:360.0 116				2819	1111	1844	2192	3374	1810	3055	262	1329	2948	1713	3735	1451	1666	4603	1327	4284	364	2483	2012	1202	1547	1389	1081	3099	1050	1342	3556	1585	4994	2347	1140	2258	5192	1019	913	1036	3135	1002	2083	2719	892
241572	1082682	299	241572	86:52.0 91:129.0 93:633.0 94:4.0 95:847.0 97:418.0 98:244.0 99:327.0 101:140.0 103:291.0 104:32.0 105:679.0 106:454.0 107:170.0 108:243.0 109:493.0 110:215.0 111:181.0 112:20.0 113:117.0 116:337.0 117:593.0 118:100.0 119:18.0 120:43.0 121:505.0 122:208.0				1463	254	1315	2244	232	436	410	161	466	1956	885	1546	1026	1986	301	2369	2219	313	1225	2020	336	2662	647	598	1029	577	799	2202	573	1824	3113	555	1391	1067	2465	592	239	2294	952	1953	2367	755
aspartic acid	480543	232	199612	85:102.0 86:172.0 87:46.0 88:27.0 89:23.0 90:5.0 91:18.0 92:1.0 93:25.0 95:10.0 96:2.0 98:114.0 99:75.0 100:3517.0 101:373.0 102:175.0 103:206.0 104:21.0 105:16.0 106:1.0 107:17.0 108:3.0 109:7.0 110:18.0 112:4.0 113:11.0 114:46.0 115:150.0 116:123.0 117:	5960	C00049		8528	4425	9263	6028	7019	3735	14140	3579	3409	6048	3692	5983	4120	5149	5930	4432	6584	3283	3148	3694	4844	6695	4761	3704	5181	5862	3734	6705	9834	4441	5484	6525	19465	5957	6810	4429	3676	6523	4212	3303	6917	5460
erythritol	471274	205	200514	85:484.0 86:98.0 87:344.0 88:306.0 89:1360.0 90:159.0 91:1305.0 92:413.0 93:938.0 94:98.0 95:309.0 96:42.0 97:75.0 98:38.0 99:347.0 100:100.0 101:2368.0 102:343.0 103:8246.0 104:765.0 105:496.0 106:52.0 107:192.0 108:40.0 110:104.0 111:112.0 112:29.0 113:	222285	C00503		3349	8570	4052	2173	6321	4047	3258	2824	2506	3682	3030	2538	4950	2894	4668	3550	4609	3462	4934	4871	4272	3811	2925	4032	2614	4588	2279	4060	3844	4541	7039	3426	2661	3845	3320	6428	5482	3080	641	5355	5078	1265
N-methylalanine	286258	130	205663	86:191.0 87:45.0 88:27.0 89:4.0 91:12.0 93:41.0 94:19.0 96:29.0 97:6.0 98:152.0 99:11.0 100:465.0 101:117.0 102:65.0 103:157.0 104:2.0 105:14.0 106:6.0 107:6.0 109:9.0 111:4.0 112:19.0 113:12.0 114:188.0 115:78.0 116:14.0 117:66.0 118:19.0 119:22.0 120:1.	5288725	C02721		54229	35280	32592	33908	37742	61995	39452	90461	58195	48564	2843	64769	40271	65277	84490	47111	60610	40836	69316	40931	51483	53023	49399	108996	105418	18583	46603	52437	42162	110752	80484	46430	45126	58708	41095	41027	32872	81215	29744	34504	48761	157060
glycolic acid	229810	177	216047	85:1.0 87:58.0 88:215.0 89:62.0 90:2.0 94:14.0 95:19.0 96:7.0 97:4.0 100:9.0 101:33.0 102:23.0 103:534.0 104:4.0 105:16.0 106:3.0 107:9.0 108:3.0 112:2.0 113:51.0 115:32.0 117:473.0 118:1.0 119:31.0 122:1.0 126:1.0 131:388.0 132:83.0 133:816.0 134:40.0 13	757	C00160		4985	6679	8308	8183	9113	7097	8925	12221	10980	8478	7267	9529	8961	7259	11144	5374	9025	8904	7350	6057	6748	7747	8569	11912	11697	7740	9516	9975	5594	8149	7633	5541	54695	10072	9150	4142	11385	12466	5677	5615	11143	12479
glutamic acid	527101	246	227977	85:357.0 86:526.0 87:203.0 88:137.0 91:2.0 95:16.0 96:64.0 98:361.0 99:127.0 100:1856.0 101:834.0 102:139.0 106:42.0 110:308.0 112:138.0 113:259.0 114:407.0 115:392.0 116:128.0 117:786.0 119:204.0 126:14.0 128:6367.0 129:1190.0 130:1088.0 131:692.0 132:55	33032	C00025		50761	31735	61440	41363	52430	24523	45621	45713	38787	42115	34680	50306	14511	29354	41297	38976	44542	25679	31046	30105	30294	31311	27472	22557	24098	61646	23568	51744	41639	28982	38835	22436	28963	34366	50367	20184	27531	37460	54323	38937	72275	26040
226850	385813	183	226850	85:1893.0 87:6891.0 88:2235.0 89:697.0 91:57.0 92:89.0 93:72.0 95:281.0 96:126.0 97:455.0 98:916.0 99:938.0 100:2511.0 101:4662.0 102:1076.0 103:2024.0 104:539.0 105:417.0 106:282.0 107:71.0 108:580.0 109:424.0 110:1774.0 111:341.0 112:95.0 113:1075.0 114				8990	9881	11030	14076	10050	9896	5669	7441	10178	5193	2381	11546	1537	7360	9259	6784	8871	19240	6755	10274	14686	11106	14731	1906	7957	6168	16615	11427	11190	7687	12342	1319	6312	6629	16091	1646	15982	11196	7359	16922	9960	4567
228612	756779	230	228612	85:203.0 86:145.0 87:22.0 88:1.0 89:1116.0 90:291.0 93:179.0 95:26.0 97:124.0 99:841.0 100:1887.0 101:1880.0 102:193.0 103:3215.0 104:231.0 105:79.0 106:294.0 107:63.0 108:150.0 109:1.0 110:170.0 112:110.0 113:141.0 114:719.0 115:331.0 116:613.0 117:3501.				1061	1249	1478	1478	1432	2067	1063	1687	769	1543	983	1556	1193	858	2216	1323	1142	1523	1158	1338	1290	2851	1531	1777	1502	1260	859	1929	1434	1562	1837	1651	1220	1338	1844	1645	1188	1292	2029	1682	1007	1142
228018	563074	275	228018	85:202.0 86:778.0 87:10.0 88:57.0 89:4162.0 90:410.0 91:189.0 93:10.0 97:127.0 98:215.0 99:41.0 100:2902.0 101:453.0 102:1326.0 103:1212.0 104:93.0 105:34.0 108:62.0 109:137.0 110:124.0 111:17.0 112:227.0 113:306.0 114:874.0 115:256.0 116:580.0 117:136.0				177	1198	1181	1950	1103	1576	1235	2124	1505	1958	1731	1514	890	942	1748	1933	2275	1911	1692	1845	1832	1388	1065	1834	1566	1556	1517	1653	2010	2040	1076	1423	878	1748	2584	971	1703	2028	767	1495	1568	2034
4-hydroxyproline	481319	140	227980	91:147.0 92:30.0 93:85.0 97:12.0 98:1289.0 99:239.0 100:1497.0 101:156.0 102:37.0 104:110.0 105:70.0 109:45.0 110:249.0 111:118.0 112:34.0 113:229.0 117:42.0 124:163.0 129:180.0 131:210.0 135:74.0 139:7.0 140:7933.0 141:850.0 142:727.0 143:72.0 150:9.0 15	825	C01015		8338	9198	8634	11274	10569	13498	16628	9791	39928	16582	5172	15195	3664	9370	46940	12160	18910	29252	13830	8805	22852	15323	1865	4250	13220	10952	13823	17924	18022	34282	11083	27364	16402	29339	19040	34585	20663	14896	11025	10671	24743	12641
phosphoric acid	344674	299	199165	85:1141.0 86:213.0 87:1561.0 88:399.0 89:1740.0 90:310.0 91:1827.0 92:509.0 93:635.0 94:79.0 95:146.0 96:332.0 97:66.0 98:187.0 99:189.0 100:388.0 102:553.0 103:4819.0 104:1286.0 105:4011.0 106:778.0 107:2556.0 108:270.0 109:902.0 110:31.0 111:43.0 112:70	1004	C00009		1345570	1280358	1282996	1195604	1418598	932026	1504954	1653359	949434	1513446	1225470	1822006	1289047	1086871	1952693	1237709	1435691	1121260	1263918	1492908	1110188	1526226	1517675	845343	1678079	1188852	1517666	1508501	997340	1579010	1399508	1293878	1300029	2196027	1579013	1526028	1058861	1693561	970753	1284665	1527808	1406740
281080	944566	429	281080	85:1889.0 86:282.0 87:4508.0 88:830.0 89:999.0 90:42.0 91:888.0 93:40.0 95:233.0 96:2530.0 97:197.0 98:4.0 101:198.0 103:3776.0 104:382.0 105:1135.0 106:158.0 107:1238.0 108:71.0 109:71.0 110:107.0 112:199.0 114:18.0 115:1153.0 116:427.0 117:4799.0 118:10				666	700	651	678	872	619	3561	549	388	443	2080	961	173	294	659	641	607	669	646	52	662	424	847	823	686	616	772	715	639	502	646	625	19049	714	741	404	789	637	216	472	558	1298
indole-3-acetate	685195	202	223508	95:19.0 98:116.0 100:105.0 126:1.0 129:23.0 130:236.0 136:12.0 142:3.0 144:36.0 145:18.0 149:1206.0 150:18.0 158:7.0 160:108.0 170:47.0 174:5.0 186:224.0 200:57.0 201:3.0 202:3534.0 203:211.0 217:42.0 219:91.0 230:11.0 248:17.0 258:5.0 259:11.0 262:17.0 2	802	C00954		1320	2356	6755	8722	2045	1175	3113	5523	2160	2554	8780	3115	2860	4628	4242	1147	10978	4022	2109	3877	5185	11143	3090	4393	7444	2898	1761	4545	4410	10688	3649	3846	3713	5810	7110	15428	3365	3468	1419	2627	2027	5539
uric acid	731185	441	221495	85:107.0 86:273.0 87:101.0 98:113.0 99:167.0 100:2033.0 101:228.0 102:67.0 103:49.0 105:15.0 107:30.0 110:47.0 111:68.0 113:29.0 114:57.0 115:104.0 116:54.0 117:172.0 120:2.0 124:15.0 125:57.0 126:3.0 127:117.0 128:33.0 130:359.0 131:959.0 132:224.0 133:3	1175	C00366		109989	117281	120497	74974	160254	134241	190391	179160	65836	179765	139859	98607	119435	94139	144362	153907	180532	174489	161342	152180	141825	56087	124442	141909	130733	153135	63715	166434	205015	176542	192927	36064	118226	279503	179694	154183	171628	198835	102851	209293	234470	156221
225403	562683	243	225403	86:1199.0 89:93.0 98:1309.0 99:102.0 100:827.0 104:339.0 107:705.0 110:160.0 111:275.0 112:55.0 113:14.0 114:15.0 123:2.0 124:316.0 128:160.0 130:66.0 134:410.0 136:204.0 139:13.0 142:712.0 147:39.0 153:25.0 155:27.0 158:85.0 169:20.0 172:46.0 173:15.0 17				2803	2674	3264	5178	1751	2902	2949	7748	2713	5125	3954	5109	8591	6690	4193	4662	5318	3258	2433	3886	3809	2692	2495	4262	3143	2261	3929	4179	3018	5191	2132	11298	3582	4112	3716	9827	3376	4715	2668	2826	4138	6182
226888	580679	170	226888	90:94.0 92:4.0 98:896.0 99:83.0 100:1027.0 101:1.0 103:14.0 106:196.0 110:152.0 111:135.0 114:145.0 118:239.0 119:2.0 120:1.0 121:2.0 124:15.0 125:1.0 128:75.0 130:187.0 134:15.0 136:3.0 138:18.0 142:165.0 143:2.0 146:1.0 149:3.0 153:12.0 154:22.0 156:154				12344	7864	9644	11705	10187	10700	10343	9418	8846	9870	10222	6212	7698	5322	7321	10480	4991	7688	7707	8212	9742	8993	8281	7861	9388	7561	9121	6742	9214	6490	7144	7647	7663	5384	7475	8432	8606	6908	5977	9588	7240	9182
269969	410322	279	269969	85:1268.0 86:2086.0 88:6267.0 89:230.0 90:261.0 91:1969.0 92:964.0 93:2330.0 94:3637.0 95:4784.0 96:7258.0 97:2484.0 98:2829.0 99:732.0 100:1335.0 101:51.0 102:921.0 103:652.0 104:1175.0 105:447.0 106:697.0 107:14436.0 108:2138.0 109:4917.0 110:4377.0 111				6812	11705	3049	5149	3492	5920	1005	2009	5140	1491	6070	2119	8088	4115	2593	3198	3231	8921	3554	1223	4056	1613	5084	7111	2849	1300	9984	2604	4315	2155	6034	8991	4460	4077	1021	7118	8020	2624	3085	3727	2276	18607
citric acid	617288	273	199168	85:3849.0 86:1455.0 87:4550.0 88:3181.0 89:2937.0 90:601.0 93:7393.0 94:929.0 95:8198.0 96:1942.0 97:7881.0 98:2221.0 99:22430.0 100:2888.0 101:7709.0 102:2368.0 103:11569.0 104:1985.0 105:3723.0 106:497.0 107:518.0 108:559.0 109:497.0 110:387.0 111:12750	311	C00158		102175	110620	181752	163740	270651	201361	211650	180450	192172	189121	174481	195548	155916	171487	268326	179306	192993	176641	172768	280184	192801	174862	135396	198396	233653	168169	131236	124151	147473	221605	144688	144357	151989	160267	153368	223993	192471	227944	120448	154535	234920	195123
281118	1037677	309	281118	93:333.0 95:231.0 98:52.0 99:40.0 103:453.0 109:135.0 115:54.0 116:153.0 121:32.0 129:2645.0 141:19.0 142:4.0 144:56.0 163:209.0 164:47.0 177:175.0 178:54.0 193:646.0 194:295.0 197:13.0 205:398.0 206:31.0 207:1321.0 208:363.0 209:190.0 213:29.0 220:5.0 22				2883	2654	1990	2842	2674	653	2192	2429	84	1555	12262	5475	762	1214	3997	3569	3142	1497	2095	2260	2221	2041	2617	322	1904	3137	2340	2735	1185	2017	2829	838	1610	3069	1507	993	5993	4864	1383	1784	1388	1589
223495	538501	170	223495	85:321.0 86:361.0 88:192.0 90:145.0 91:519.0 92:101.0 93:151.0 94:913.0 95:42.0 96:1144.0 97:364.0 98:3919.0 99:412.0 100:1875.0 101:192.0 102:1163.0 106:289.0 107:709.0 108:922.0 109:238.0 110:1003.0 111:53.0 112:288.0 113:335.0 114:466.0 115:364.0 116:1				26890	14060	33106	33695	36278	28980	26031	23960	13534	31200	17433	31468	22048	18403	29947	24603	24514	16782	17591	26449	25707	27095	12952	22116	30108	21372	16694	27665	26144	24573	21611	26157	7461	32173	23559	33821	20617	31241	15183	16776	25810	13754
223536	521629	156	223536	86:100.0 87:72.0 88:636.0 89:43.0 93:15.0 94:150.0 98:1201.0 99:201.0 101:306.0 103:200.0 107:198.0 108:611.0 109:235.0 110:347.0 112:23.0 113:56.0 114:334.0 115:1.0 116:93.0 118:56.0 122:351.0 124:153.0 126:124.0 132:25.0 134:190.0 138:82.0 140:320.0 141				12613	6161	16010	16027	19269	15106	13173	10087	6007	15756	7355	16308	10392	9700	15422	11827	12470	7513	7634	13175	12508	13413	5510	9993	15193	10564	6891	14371	13333	12206	11577	13436	7621	15934	12306	16484	9543	15608	6564	6880	13396	5540
2-hydroxyvaleric acid	310750	131	218773	85:1140.0 86:325.0 87:79.0 88:41.0 89:349.0 90:12.0 94:13.0 95:1557.0 96:1414.0 97:153.0 98:157.0 99:228.0 100:481.0 101:220.0 103:65.0 105:6.0 106:3.0 107:100.0 110:2.0 111:68.0 112:145.0 113:440.0 114:198.0 115:2353.0 116:2204.0 117:816.0 118:74.0 119:6	98009			5567	6842	5205	6049	.	5697	.	4574	4656	.	6280	.	5233	11690	.	.	.	6139	9597	.	6348	.	6801	6577	.	.	7245	.	.	.	9254	4829	5224	.	.	6690	5707	.	5214	5208	.	7966
226867	735540	290	226867	86:64.0 87:146.0 88:292.0 90:31.0 91:1.0 93:104.0 94:31.0 95:42.0 97:112.0 98:1633.0 99:567.0 100:1729.0 101:145.0 102:117.0 103:3386.0 104:75.0 107:319.0 110:153.0 111:191.0 113:153.0 114:359.0 115:282.0 116:991.0 117:509.0 118:70.0 121:11.0 123:58.0 125				2863	1884	2066	3290	2135	1012	2220	663	972	1476	512	2175	2193	1240	2019	1561	4064	1948	1434	3601	974	1382	325	1317	3351	2013	1096	3404	1829	1685	1485	1432	1353	1712	991	1636	1641	1788	1024	1435	1397	1622
behenic acid	919675	117	203290	85:443.0 86:84.0 87:239.0 88:45.0 89:113.0 90:5.0 91:86.0 92:19.0 93:75.0 94:6.0 95:310.0 96:111.0 97:661.0 98:211.0 99:150.0 100:28.0 101:378.0 102:25.0 103:1615.0 104:96.0 105:114.0 106:5.0 107:39.0 109:98.0 110:13.0 111:239.0 112:35.0 113:56.0 114:9.0	8215	C08281		42774	10453	6623	8607	6148	7225	.		8251	6341	.	6497	9242	8465	6260	6432	4765	9902	8342	6203	6409	6394	9535		5270	7634	11110	6885	5394	4297	7117	7489	29147	6081	5305	7770	9214	5623	7616	10066	6027	.
isothreonic acid	489846	292	200467	85:155.0 86:70.0 89:322.0 90:41.0 91:85.0 92:73.0 93:234.0 96:28.0 98:28.0 99:31.0 101:76.0 102:1447.0 103:1824.0 104:203.0 105:115.0 106:38.0 108:13.0 110:10.0 112:44.0 113:75.0 114:25.0 116:110.0 117:2303.0 118:235.0 119:183.0 120:24.0 126:17.0 127:15.0	151152	n/a		6214	5222	5070	5598	8210	5238	6106	6556	5101	6919	5538	5427	4878	6316	6034	5704	7920	5872	7046	6385	7981	5668	5024	5349	4985	7251	4790	7163	5295	6664	7741	5616	4658	5685	7036	7902	6489	8829	6113	6574	7961	7719
creatinine	502434	115	199603	85:33.0 86:125.0 87:4.0 88:21.0 89:2.0 91:138.0 92:33.0 93:3.0 94:1.0 97:3.0 98:24.0 99:272.0 100:2703.0 101:266.0 102:90.0 105:11.0 106:2.0 107:5.0 108:1.0 110:49.0 111:11.0 112:6.0 113:112.0 114:433.0 115:6116.0 116:644.0 117:253.0 118:19.0 126:17.0 127	588	C00791		31912	16554	47025	37186	46603	27694	61984	20705	21938	34044	16644	55601	48513	55597	53494	37863	67044	21707	20864	56607	43597	58317	10505	21511	54109	33943	23945	69556	58557	55219	45759	44340	21199	86865	43209	93564	23211	61054	35500	25263	63266	32079
211382	773139	147	211382	85:2.0 86:6.0 87:5.0 89:4.0 93:1.0 99:6.0 100:5.0 101:5.0 103:13.0 104:3.0 107:5.0 109:26.0 110:1.0 111:8.0 112:3.0 113:24.0 115:3.0 116:2.0 117:1.0 119:5.0 120:2.0 121:7.0 125:7.0 126:7.0 127:20.0 128:1.0 129:136.0 130:3.0 131:34.0 132:6.0 133:147.0 134:				32136	30539	13490	51570	22401	22750	24470	30705	24556	36675	29185	28922	17748	22554	39206	31604	27530	28178	45314	26239	16657	31158	16219	29169	39439	36705	22662	36073	21914	24767	36756	17082	33822	56725	31486	32361	25444	33200	20127	25237	28858	24417
isoleucine	356931	158	205110	85:49.0 86:134.0 87:42.0 88:7.0 89:12.0 90:37.0 91:29.0 92:81.0 93:25.0 94:7.0 96:11.0 97:10.0 98:12.0 99:3.0 100:344.0 101:43.0 102:92.0 103:69.0 104:1.0 106:15.0 107:24.0 108:22.0 109:1.0 110:6.0 114:32.0 115:17.0 116:16.0 117:25.0 118:7.0 119:12.0 120:	6306	C00407		183259	193274	148279	160055	181097	154512	103485	47193	174906	126595	75796	135519	186543	141252	184059	136973	142155	191007	168587	130330	157044	92464	222162	90807	149764	148766	183227	183167	133188	181338	182164	156036	82032	95351	111347	187206	164550	122420	60427	173657	114657	113139
1-hexadecanol	679338	299	213408	85:5855.0 86:768.0 87:2701.0 88:1014.0 89:14519.0 90:1392.0 91:4241.0 92:351.0 93:261.0 94:58.0 95:1655.0 96:824.0 97:15257.0 98:1810.0 99:3243.0 100:578.0 101:7460.0 102:1024.0 103:18214.0 104:1657.0 105:757.0 106:2.0 107:101.0 108:3.0 109:530.0 110:181.	2682	C00823		1324	1681	1296	1409	3296	1183	11441	2244	996	2526	1338	2563	1801	1509	2452	1287	3183	1194	1414	2006	1158	2555	3339	1440	2314	2255	2443	2441	1128	2197	1409	1591	3779	3182	2234	2070	1348	2896	1539	1396	2317	1527
isonicotinic acid	367074	180	206136	86:33.0 90:179.0 91:54.0 92:2.0 94:27.0 102:8.0 105:112.0 106:3319.0 107:261.0 109:41.0 111:4.0 112:36.0 114:8.0 120:46.0 121:16.0 122:20.0 123:12.0 135:1.0 136:3703.0 137:519.0 138:137.0 144:5.0 153:1.0 161:4.0 162:12.0 163:1.0 164:24.0 167:48.0 174:8.0	5922	C07446		1877	1002	1887	1671	1624	1123	6908	868	915	1468	1804	1818	1589	3300	1601	2439	2361	698	658	1040	1498	1575	1010	3757	1214	1125	952	1639	4708	1687	693	1158	6170	2569	3117	1461	778	2018	2158	785	1213	1816
2-aminoadipic acid	572700	260	213131	85:864.0 86:878.0 87:624.0 88:261.0 89:926.0 90:176.0 91:6.0 94:25.0 96:235.0 97:3.0 98:936.0 99:564.0 100:4884.0 101:1366.0 102:334.0 103:4605.0 104:443.0 105:319.0 106:102.0 108:362.0 109:99.0 110:48.0 111:67.0 112:444.0 113:191.0 114:432.0 115:2603.0 1	469	C00956		544	449	631	721	443	401	681	403	514	698	442	523	362	646	498	740	696	569	509	433	776	450	434	193	181	663	371	551	391	579	319	339	521	623	644	552	589	837	665	574	433	410
threonine	409403	117	199626	85:164.0 86:362.0 87:290.0 88:38.0 89:34.0 90:14.0 91:33.0 92:7.0 93:4.0 94:4.0 95:2.0 96:20.0 97:16.0 98:42.0 99:43.0 100:1349.0 101:2357.0 102:353.0 103:220.0 104:22.0 105:10.0 106:4.0 107:104.0 110:50.0 112:49.0 113:14.0 114:249.0 115:190.0 116:89.0 11	6288	C00188		75236	79931	116866	88051	77677	85051	91334	50171	123565	102103	78184	168964	113779	101215	113245	131536	128157	76554	59272	88108	97585	85983	59462	98128	128186	82027	67714	116571	103404	124305	63564	192853	83437	118572	152014	75216	82966	117610	59998	59279	114256	134026
281348	241383	151	281348	85:725.0 87:42.0 89:774.0 90:308.0 91:24173.0 92:1878.0 93:5005.0 94:197.0 95:26065.0 96:1106.0 98:5099.0 99:404.0 101:39.0 102:498.0 103:3687.0 104:1970.0 105:6276.0 106:825.0 107:3037.0 108:97.0 109:23175.0 110:4737.0 111:15712.0 112:2496.0 115:4817.0 1				29191	29545	38549	36761	34986	36427	37721	45193	31889	34851	10571	39760	38850	22691	37380	30584	34764	29549	31553	35963	29526	39039	25286	39123	32261	35429	32676	34364	25330	31210	24158	29997	230558	42353	44256	27022	31038	41755	19856	32288	40707	29877
glutamine	600452	156	199776	85:177.0 86:247.0 87:91.0 88:20.0 89:36.0 90:14.0 92:11.0 93:3.0 94:6.0 95:10.0 96:7.0 97:5.0 98:138.0 99:366.0 100:947.0 101:207.0 102:139.0 103:205.0 104:21.0 105:8.0 106:4.0 107:25.0 108:7.0 110:32.0 111:14.0 112:252.0 113:161.0 114:557.0 115:453.0 116	5961	C00064		427845	434370	526432	527817	426207	466491	454033	605794	472935	636142	518831	659477	462234	401561	505768	675249	709252	511751	481907	702563	587839	411290	278159	574704	668103	567611	558159	521383	607425	570122	365523	545305	316842	458136	691534	421123	518349	602916	328976	461067	382853	930854
pyrophosphate	548254	451	213203	85:93.0 89:91.0 90:60.0 93:179.0 94:108.0 95:76.0 97:38.0 98:174.0 101:261.0 104:87.0 107:29.0 108:227.0 111:52.0 113:85.0 115:163.0 116:76.0 117:1911.0 118:142.0 119:88.0 121:95.0 124:37.0 126:41.0 127:246.0 128:40.0 129:894.0 131:420.0 132:623.0 133:532	1023	C00013		12538	7926	14686	14580	18657	11641	11848	9262	11446	11895	8266	16428	9085	15522	18433	12107	17963	8319	10935	17630	11776	15755	7076	9849	19135	14565	9098	18625	13157	15295	11161	10145	8708	20409	15200	10042	10038	17332	9273	10411	15479	12350
269151	341172	130	269151	88:186.0 89:23.0 90:241.0 91:21.0 93:131.0 94:478.0 95:96.0 96:195.0 98:342.0 99:223.0 100:985.0 103:233.0 109:244.0 110:441.0 111:320.0 112:1297.0 113:429.0 114:2633.0 115:490.0 117:1156.0 118:264.0 121:113.0 124:29.0 128:165.0 129:64.0 130:10528.0 131:4				15336	17410	16150	13173	17960	16096	6471	15862	20595	11837	15359	12468	14917	19468	12370	12198	10656	18021	19888	7109	18399	16425	13443	9906	10011	18777	17798	16316	16516	7590	16540	14907	15211	12038	14900	11393	24654	8667	17265	23028	15801	21232
inositol myo-	729867	305	199164	85:3012.0 86:683.0 87:4229.0 88:1173.0 89:2141.0 90:264.0 91:1051.0 92:435.0 93:343.0 94:183.0 95:507.0 96:215.0 97:761.0 98:556.0 99:3253.0 100:554.0 101:7623.0 102:2914.0 103:60634.0 104:6045.0 105:4298.0 106:438.0 107:409.0 108:109.0 109:1687.0 110:201	892	C00137		21296	23357	31941	25372	36109	29911	34377	31664	35052	34076	38958	32760	23110	48980	35999	42949	42276	40046	34402	55365	52476	31736	26777	25534	34653	55830	34450	52007	43826	43784	48989	33811	29793	40730	34976	62413	39768	44501	25195	52132	71403	69247
221569	425557	156	221569	86:75.0 88:136.0 89:193.0 90:36.0 91:158.0 92:140.0 93:26.0 94:31.0 95:68.0 96:12.0 97:310.0 98:140.0 99:40.0 100:358.0 101:14.0 103:9.0 104:167.0 106:74.0 107:294.0 108:53.0 109:151.0 110:924.0 111:292.0 112:128.0 114:107.0 116:41.0 118:23.0 119:22.0 124				11695	8242	11301	13679	15769	14149	14084	9657	9971	12883	11829	13651	6713	5203	13659	11904	12792	9749	11424	13865	11401	13972	11815	9278	15702	13149	9313	14472	11969	11107	8941	6217	8165	14570	13580	6281	11047	16663	6338	11946	10687	14557
240439	584307	170	240439	85:1114.0 86:1694.0 87:16651.0 88:914.0 89:691.0 91:461.0 93:599.0 94:821.0 95:1099.0 96:2174.0 97:3392.0 98:6948.0 99:195.0 100:1142.0 101:2002.0 102:1350.0 103:2422.0 104:312.0 107:2702.0 108:1044.0 109:350.0 110:1331.0 111:765.0 112:1302.0 113:218.0 11				2647	1821	2324	2889	2432	2802	2635	1768	1968	2807	2231	2082	2050	1998	2076	2695	1810	1804	1924	2083	2065	2315	1583	2187	2325	2219	1944	2486	2377	1665	1856	1707	1789	1952	2107	2152	2077	2053	1467	1990	1948	2082
221572	444313	170	221572	85:57.0 86:255.0 90:46.0 91:197.0 92:78.0 93:182.0 94:154.0 95:166.0 96:610.0 97:406.0 99:84.0 100:634.0 102:62.0 105:63.0 107:379.0 108:53.0 109:36.0 110:1024.0 111:210.0 112:79.0 113:27.0 114:83.0 115:43.0 116:78.0 117:71.0 118:116.0 120:14.0 123:19.0 1				5179	3511	4878	6041	6381	5672	5959	3101	4811	5806	4487	7590	1739	2707	7784	5468	7710	3805	4768	7299	4830	6157	4914	3851	7545	5832	4193	6889	4271	6124	3661	1910	3308	8489	5854	1834	4890	9250	3088	5258	4694	3714
281271	711045	451	281271	101:43.0 107:360.0 109:10.0 110:251.0 116:56.0 143:56.0 144:75.0 160:9.0 162:1007.0 163:9.0 164:117.0 172:24.0 176:60.0 177:134.0 185:110.0 188:131.0 203:39.0 208:22.0 211:36.0 217:63.0 218:3.0 232:11.0 234:78.0 235:137.0 236:240.0 237:40.0 249:87.0 250:5				1856	1810	2052	2172	2162	1820	1751	2052	1538	1750	1918	2364	1858	1916	1783	1745	1522	2003	1775	1910	1860	1954	1636	2171	1922	1709	2043	2193	1682	1825	1617	1695	2033	1948	2052	2046	1691	2004	1638	1941	1905	2114
213353	695971	293	213353	85:397.0 86:1005.0 87:191.0 88:282.0 89:155.0 90:2.0 91:1166.0 92:36.0 93:230.0 95:6.0 97:904.0 98:19.0 99:2.0 100:174.0 101:47.0 103:372.0 104:47.0 105:929.0 107:190.0 109:134.0 110:71.0 112:3.0 114:12.0 115:817.0 116:562.0 117:397.0 118:146.0 119:849.0				4345	4437	5114	5765	5692	5265	4780	4938	4521	4917	5398	6072	4582	3958	5360	4562	4672	4727	4653	5379	4383	5345	4356	4789	5221	4732	4530	5968	4405	4511	4186	4265	5211	5652	5201	4835	4707	5717	4300	4899	4719	5739
lathosterol	1095135	255	269290	85:1661.0 86:198.0 87:265.0 88:85.0 89:1625.0 90:195.0 91:25081.0 92:4410.0 93:15518.0 94:4159.0 95:20744.0 96:2605.0 97:3831.0 98:382.0 99:458.0 100:45.0 101:2392.0 102:388.0 103:1972.0 104:1210.0 105:23255.0 106:6154.0 107:18834.0 108:3827.0 109:8361.0	65728	C01189		536	647	724	637	659	493	944	.	526	602	.	867	330	668	730	1525	673	522	603	778	448	498	360		603	415	504	568	358	866	352	276	249	945	500	501	682	665	623	378	643	.
281128	498007	156	281128	88:375.0 90:48.0 92:10.0 96:1.0 98:501.0 99:52.0 100:216.0 101:1.0 102:141.0 103:62.0 106:7.0 108:483.0 110:9264.0 111:728.0 112:28.0 113:18.0 114:3848.0 115:41.0 116:695.0 118:477.0 119:33.0 122:34.0 126:2.0 128:158.0 129:86.0 130:37.0 133:215.0 134:2481				6243	6849	7191	7118	7907	6165	5914	8063	5508	6860	7570	7875	6553	5618	7159	6685	6221	7032	5988	5888	6481	6966	5853	8283	7152	5246	7025	6163	5720	6333	5624	6126	6627	8006	6959	6453	5768	7477	4675	6883	7100	9061
223521	1166398	283	223521	85:153.0 95:206.0 96:208.0 97:111.0 100:42.0 109:59.0 110:14.0 111:80.0 113:58.0 120:29.0 123:26.0 124:7.0 129:1826.0 135:169.0 142:104.0 143:7.0 155:103.0 157:9.0 162:2.0 163:39.0 165:39.0 166:82.0 176:55.0 177:123.0 179:32.0 180:19.0 183:67.0 191:134.0				2810	2521	4197	3943	4027	1922	2325	2572	3034	2586	3262	4320	1379	2702	2562	183	3785	3908	2528	4410	1928	2852	3327	1931	5362	3165	2572	2418	2391	3486	4439	1087	2179	3526	2753	2032	2284	4651	1934	3706	2702	2208
tryptophan	779834	202	199775	86:27.0 87:274.0 88:35.0 89:61.0 90:26.0 91:147.0 92:19.0 93:50.0 94:4.0 100:133.0 101:54.0 102:184.0 103:173.0 104:20.0 105:43.0 106:10.0 107:18.0 108:29.0 113:15.0 114:34.0 115:146.0 116:31.0 118:17.0 119:53.0 120:26.0 121:10.0 126:15.0 127:6.0 128:77.0	6305	C00078		151130	128476	203393	186768	160550	161660	161612	171792	146976	180634	128903	168377	109656	110472	185852	163844	212410	145599	103093	197845	119555	188807	119343	194416	216129	108322	143125	243372	158311	123381	131554	148952	125985	196866	172298	112793	68977	254651	120317	118712	214933	145485
224788	493150	228	224788	85:2304.0 86:1438.0 87:3224.0 88:78.0 90:26.0 91:287.0 93:87.0 94:336.0 97:694.0 98:8479.0 99:1237.0 100:1356.0 101:161.0 102:393.0 103:325.0 104:1.0 105:72.0 107:564.0 108:745.0 110:11572.0 111:221.0 112:1398.0 113:312.0 114:11585.0 115:1280.0 116:193.0				28206	28482	33287	31131	36255	28241	27394	35574	24281	30382	33051	36617	28880	27077	32670	29030	30561	29515	26583	27567	27406	30615	24146	33807	32108	24564	30281	32624	27256	29708	25169	28345	27618	37567	32126	31484	26811	32857	28143	31977	32045	41025
224551	501237	228	224551	85:291.0 86:256.0 88:22.0 89:452.0 91:277.0 93:47.0 94:61.0 96:7.0 97:265.0 98:267.0 100:230.0 104:57.0 105:21.0 106:116.0 107:293.0 108:386.0 109:238.0 110:1300.0 113:221.0 114:211.0 116:215.0 117:410.0 118:258.0 120:2.0 122:13.0 123:77.0 128:353.0 129:7				1611	2316	1714	888	721	3292	613	824	843	912	2420	1145	2820	1334	1390	616	660	1375	1020	748	1210	787	13087	9224	820	669	51477	1148	486	420	5291	18305	1289	444	448	13115	8252	2444	837	995	924	25784
229268	407022	263	229268	85:1296.0 86:1190.0 87:1319.0 88:1347.0 89:535.0 90:101.0 94:1505.0 95:768.0 96:1076.0 98:1853.0 99:3947.0 100:1153.0 101:1082.0 102:1699.0 103:3331.0 104:240.0 105:355.0 107:891.0 108:1306.0 109:81.0 110:1027.0 111:4201.0 112:874.0 113:1039.0 114:689.0 1				12763	20395	10617	15486	5537	11418	8255	30456	7475	8862	35897	5468	17920	7102	4333	14758	3802	22535	10862	5111	9147	6872	42189	29972	5088	10381	22202	6373	3822	3527	8557	14054	19336	4714	5848	9141	23123	5123	17366	22413	7686	304278
228401	594044	170	228401	85:412.0 86:2491.0 88:912.0 94:1112.0 95:169.0 96:1493.0 98:1068.0 99:1017.0 100:3446.0 101:3233.0 102:2205.0 103:5988.0 104:395.0 106:62.0 108:1609.0 109:604.0 111:400.0 113:399.0 114:167.0 115:184.0 116:3953.0 117:9072.0 118:1539.0 119:197.0 120:249.0 1				23932	15181	19853	26110	17750	23528	23461	17804	17134	21385	20486	13027	19466	11436	14730	23865	8924	17417	16176	17615	18027	20584	13591	17297	19945	17923	16789	18501	16620	10951	13773	17643	14753	10436	13455	19040	16297	13313	15217	17449	15833	18065
pseudo uridine	813829	217	213381	85:213.0 86:79.0 87:140.0 88:32.0 89:17.0 91:53.0 92:21.0 93:66.0 94:15.0 97:3.0 98:19.0 99:228.0 100:795.0 101:273.0 102:27.0 103:733.0 104:19.0 105:21.0 106:69.0 107:11.0 108:12.0 110:4.0 111:79.0 113:175.0 115:57.0 116:38.0 117:251.0 119:107.0 120:3.0	15047	C02067		3489	4688	6075	4891	11120	6754	7068	8145	5239	6988	6187	5658	5269	5406	7680	8054	9324	5813	12385	8604	11290	6518	4175	5581	6538	10079	6328	7250	9682	6326	8044	6612	6731	8224	7731	12694	9163	7115	4855	11080	11252	12423
glycerol	343749	205	207507	85:458.0 87:445.0 88:273.0 89:1241.0 90:117.0 91:85.0 93:120.0 94:8.0 95:48.0 98:24.0 99:99.0 101:1759.0 102:189.0 103:6906.0 104:735.0 105:547.0 106:86.0 107:18.0 108:34.0 109:13.0 110:10.0 111:37.0 112:45.0 113:209.0 115:479.0 116:604.0 117:7660.0 118:9	753	C00116		115056	94926	145275	122214	179571	162882	158020	107664	163637	168923	123173	104810	117612	129287	184004	155125	86047	85855	325359	169343	229476	125543	148721	138344	143484	146912	111365	179365	120433	128722	222916	151191	120653	139072	92812	143178	113785	178065	77841	130294	143904	98957
1-monoolein	952993	129	213963	85:48.0 87:122.0 89:15.0 91:85.0 93:126.0 94:22.0 95:270.0 96:54.0 97:76.0 98:19.0 99:8.0 101:244.0 102:2.0 103:774.0 104:24.0 105:55.0 107:41.0 109:91.0 110:5.0 111:37.0 115:13.0 116:67.0 117:223.0 119:4.0 121:31.0 123:43.0 129:1231.0 130:117.0 131:212.0	5283468	C01885		28051	2300	2303	6428	3261	8978	4270	5257	5750	5399	3008	7814	3880	15190	10195	10485	5215	3661	46898	5710	13628	2361	3821	13426	20594	3936	4001	5840	7597	6766	8806	3551	13060	24357	10738	6767	2461	7380	2216	3722	4283	5351
229108	281476	234	229108	89:832.0 90:1338.0 91:14297.0 92:1241.0 93:392.0 95:547.0 96:222.0 97:3406.0 102:26477.0 103:3984.0 104:1802.0 105:1192.0 106:633.0 107:5043.0 108:602.0 109:326.0 111:67.0 112:311.0 115:799.0 116:330.0 117:2961.0 118:1195.0 119:665.0 122:248.0 123:180.0 1				5463	5297	6403	6865	9155	6875	6004	5107	4264	5944	5865	7592	5428	5101	6686	5839	6269	6181	5034	6363	5957	6353	5190	5657	6971	5661	5524	7001	5842	5823	5267	5868	4650	7912	5890	5578	5772	7510	5207	5240	6351	5747
1-monostearin	959625	399	202835	85:6330.0 86:711.0 87:915.0 88:990.0 89:2210.0 90:285.0 91:3.0 93:993.0 94:407.0 95:6596.0 96:705.0 97:6331.0 98:2075.0 99:2365.0 100:413.0 101:9553.0 102:1183.0 103:10389.0 104:1177.0 105:1061.0 106:102.0 107:681.0 108:86.0 109:3734.0 110:504.0 111:2825.	24699	D01947		2529	1957	2836	3100	2803	2338	2110	2162	1959	3614	1578	2059	1448	1666	3349	1945	2253	1804	3211	1981	1443	1418	2288	2364	2933	3918	1588	2511	2299	1544	1815	1587	2755	3223	1859	2580	3843	2611	1512	2739	2874	1883
241369	194932	172	241369	85:53.0 86:9844.0 87:2769.0 88:4750.0 92:415.0 93:364.0 96:360.0 97:82.0 98:3399.0 99:1560.0 100:22462.0 101:3310.0 102:2280.0 104:23.0 105:4768.0 109:151.0 110:1920.0 111:235.0 112:1568.0 114:10584.0 115:1997.0 116:23782.0 117:2553.0 118:2080.0 119:13.0				314390	268423	204111	403827	389137	368603	372792	392726	237429	395138	231375	477009	383439	371212	426645	299674	433994	307033	328154	403255	335651	438748	289515	357042	364591	371995	338757	290468	304840	441730	252143	307166	267008	490801	343251	340558	313231	475340	386232	326826	367377	270671
224037	606591	170	224037	85:84.0 86:18.0 93:8.0 94:186.0 95:3.0 96:379.0 98:1.0 100:498.0 101:113.0 103:9.0 104:170.0 105:4.0 107:46.0 108:237.0 109:85.0 110:811.0 114:138.0 116:2.0 117:37.0 118:2.0 121:4.0 122:128.0 123:33.0 124:62.0 125:92.0 126:62.0 128:261.0 129:73.0 130:207.				4600	4397	6581	6305	7428	4953	4282	5823	3685	5564	4244	8772	5575	5246	6903	4697	6790	4230	4200	4737	4844	5718	2574	6422	5732	4849	4300	6639	5120	6229	4445	5771	2519	7748	5750	6601	4467	7303	4605	4277	5259	3876
226907	716792	387	226907	85:19.0 87:164.0 88:14.0 90:133.0 93:254.0 94:85.0 95:1499.0 96:1432.0 97:265.0 98:730.0 99:242.0 100:1238.0 101:1317.0 102:447.0 103:287.0 104:75.0 106:1.0 108:68.0 110:303.0 111:226.0 112:208.0 113:415.0 114:480.0 115:259.0 116:407.0 119:34.0 122:38.0 1				1828	2061	1315	1604	702	1609	912	1920	1995	1090	2070	696	2015	1101	453	1260	327	2423	1793	560	1436	992	1965	1825	589	1204	2341	798	606	435	990	1668	2064	290	849	932	1967	486	1672	2306	935	3888
fumaric acid	390708	245	218753	85:6057.0 86:1918.0 87:2399.0 88:1256.0 89:1938.0 90:528.0 91:781.0 92:256.0 93:878.0 94:229.0 95:362.0 96:415.0 97:1880.0 98:3061.0 99:3463.0 100:2189.0 101:1695.0 102:1076.0 103:4290.0 104:1244.0 105:1883.0 106:512.0 107:2116.0 108:569.0 109:333.0 110:1	444972	C00122		2436	2025	2687	2901	3549	3165	4142	3189	2759	3961	5448	3218	3026	1986	3745	2643	2517	2807	2756	3214	2982	2977	2533	9693	3536	2778	2594	3268	2086	2732	2208	2965	7070	3391	2245	3309	2563	3024	2009	2302	4231	5551
238566	611453	170	238566	85:217.0 86:403.0 89:345.0 90:218.0 92:134.0 93:45.0 94:410.0 95:249.0 96:1189.0 98:5389.0 99:384.0 100:1963.0 102:67.0 103:246.0 108:321.0 110:860.0 112:424.0 113:107.0 114:289.0 115:456.0 117:647.0 121:66.0 122:176.0 124:298.0 125:42.0 126:430.0 128:756				16900	10207	18068	19045	18653	17572	17331	14186	11614	17865	13000	17041	14226	10674	14285	15810	10984	12727	11685	15003	14861	17827	9380	14488	17073	15797	12212	17446	14628	11602	13300	13912	9122	13229	16357	15628	12278	15004	11129	13641	13562	12202
239966	806614	290	239966	90:30.0 91:32.0 94:18.0 100:206.0 103:3128.0 104:321.0 105:40.0 106:35.0 107:231.0 108:64.0 110:27.0 116:42.0 128:19.0 132:33.0 134:24.0 138:38.0 139:3.0 140:53.0 143:28.0 144:430.0 145:1.0 148:389.0 149:184.0 152:6.0 153:1.0 154:12.0 158:82.0 160:50.0 16				2045	988	839	2077	1329	1706	1107	1108	1949	2069	513	1979	1335	1538	2355	2717	1767	1079	2147	1862	1048	2674	577	459	1580	2098	768	1673	2206	2150	2247	960	1023	2996	2409	1750	923	2737	891	1469	2288	631
indole-3-lactate	764543	202	223518	98:163.0 100:2.0 110:5.0 114:3.0 116:31.0 117:51.0 129:157.0 144:38.0 169:17.0 170:17.0 171:45.0 197:49.0 202:1980.0 203:219.0 204:144.0 217:86.0 228:9.0 231:14.0 235:14.0 241:11.0 253:13.0 267:1.0 274:10.0 276:3.0 282:17.0 286:2.0 307:11.0 310:1.0 318:12	92904	C02043		1335	2198	3032	1432	1885	4398	4645	2122	2885	2337	2698	2000	1737	1244	1628	1905	3545	2517	2045	1927	1698	2215	1593	2402	3127	2139	2448	3241	2431	1797	2134	3321	2327	7440	2287	2038	1095	7025	1568	3624	3859	2536
235678	530661	329	235678	85:1326.0 86:702.0 87:399.0 88:51.0 89:894.0 91:68.0 92:3.0 95:414.0 97:729.0 99:2060.0 100:1458.0 102:366.0 103:602.0 104:28.0 107:445.0 108:376.0 109:1010.0 110:531.0 111:560.0 112:123.0 113:549.0 115:512.0 116:368.0 117:604.0 118:404.0 120:2.0 124:99.0				2088	2403	897	1742	454	1395	800	1595	3129	843	1343	694	1069	833	476	1794	338	2110	2891	753	1216	804	2241	1393	712	1169	2405	1003	729	367	1458	257	2025	502	623	389	1535	594	1313	2487	962	2143
281120	231838	97	281120	85:19847.0 86:1102.0 91:3983.0 92:975.0 93:5049.0 94:764.0 95:14127.0 96:3676.0 97:180656.0 98:15813.0 99:1784.0 106:5.0 107:3119.0 108:1494.0 109:3145.0 110:4563.0 111:23718.0 112:64624.0 113:11463.0 116:6914.0 120:127.0 121:54.0 122:1014.0 123:9293.0 12				143799	141840	190163	193584	205437	164285	211746	223141	167049	194580	173287	215594	12154	167527	200547	166220	190904	152119	170314	195309	157512	216602	157601	185348	182712	194992	15529	182695	144741	133323	130738	152739	162202	229790	219205	159070	166082	208514	158654	178062	199178	150384
228809	428316	124	228809	86:61.0 87:98.0 88:246.0 90:218.0 93:380.0 94:1046.0 95:563.0 96:6718.0 97:1086.0 98:2499.0 100:268.0 107:639.0 108:571.0 109:229.0 111:464.0 112:757.0 113:134.0 118:41.0 120:905.0 122:129.0 124:20325.0 125:1383.0 127:719.0 130:510.0 132:60.0 134:1051.0 1				26447	25819	26364	29451	37930	34134	29019	24013	27167	25622	30747	29394	16565	16949	30883	25364	28404	28969	28380	30042	24682	28510	26560	30593	31247	26759	26023	33769	29915	25206	26244	14363	26091	32578	31413	17218	28746	35231	18522	30101	27867	28484
tocopherol beta	1022809	222	270413	85:114.0 91:125.0 92:107.0 93:440.0 95:376.0 96:213.0 97:90.0 101:14.0 102:99.0 105:159.0 107:29.0 109:43.0 111:72.0 112:1.0 116:66.0 119:48.0 123:11.0 129:558.0 131:91.0 135:203.0 136:94.0 137:17.0 145:58.0 151:81.0 158:10.0 163:12.0 164:82.0 165:110.0 1	8989	C14152		664	912	1073	780	1285	1236	829	1338	533	546	525	1335	879	1095	1569	634	975	1144	1417	1056	971	1362	1044	733	847	862	1111	1332	931	1003	1066	605	833	1985	925	1215	1081	665	523	880	436	1291
pelargonic acid	399163	117	201810	85:67.0 86:17.0 87:23.0 88:4.0 89:34.0 90:10.0 91:3.0 93:8.0 94:2.0 95:1.0 96:2.0 97:57.0 98:40.0 99:72.0 100:25.0 101:41.0 105:62.0 106:3.0 107:3.0 108:3.0 109:2.0 111:20.0 112:3.0 114:3.0 115:3.0 116:88.0 117:1770.0 118:174.0 119:61.0 120:4.0 121:7.0 12	8158	C01601		56480	53293	79222	71867	46369	70875	65445	65234	38272	75627	36781	85077	60635	90007	70247	56486	58199	55942	36065	52069	62462	62857	80942	69869	79213	57891	119153	59694	52466	44199	56411	91374	72998	40578	66055	108853	68422	66108	67960	39819	64764	98802
citrulline	620728	157	228157	85:2825.0 86:7247.0 87:953.0 88:941.0 89:1439.0 90:1221.0 91:235.0 94:906.0 95:815.0 98:4279.0 99:5206.0 100:8317.0 101:3186.0 102:3144.0 103:15692.0 104:1685.0 105:683.0 107:928.0 108:123.0 109:564.0 111:391.0 112:234.0 113:29.0 114:1627.0 115:2867.0 116	9750	C00327		5738	6923	11594	5354	9637	6317	6302	8665	8433	9775	8538	7190	13641	10452	6688	9138	5968	6282	6053	7105	10507	6525	4015	7719	10392	8260	9462	11386	9564	5820	7861	17284	6030	6820	8381	18468	6014	4193	7438	6556	8361	11791
281186	760555	315	281186	87:382.0 90:5.0 94:388.0 95:2.0 96:314.0 97:764.0 98:354.0 99:212.0 100:20.0 101:268.0 104:21.0 105:291.0 111:225.0 112:53.0 114:273.0 115:195.0 116:382.0 117:558.0 118:123.0 121:303.0 122:481.0 123:28.0 124:112.0 125:63.0 126:289.0 127:45.0 128:127.0 129				823	359	1197	1325	1107	1376	1627	938	296	2127	595	1522	1602	691	1424	664	1189	824	637	1458	719	954	435	576	1714	1013	362	1669	418	1463	388	1473	1600	1312	609	1847	567	1285	634	361	2265	769
234579	378003	315	234579	89:1510.0 90:1305.0 91:226.0 93:625.0 94:133.0 103:2278.0 104:191.0 106:144.0 107:387.0 109:231.0 110:2231.0 112:477.0 113:84.0 114:4886.0 117:585.0 119:992.0 123:647.0 126:1047.0 128:182.0 132:544.0 133:1668.0 134:726.0 137:311.0 139:149.0 140:7149.0 141				4006	4958	2998	2932	2437	2133	4396	5262	3985	3310	5888	3262	4900	3211	3082	3608	1716	4038	4531	3376	2941	3595	6637	2950	3032	2823	5589	2476	1513	2561	3906	3747	7371	3086	3320	3763	4144	2444	4038	4304	4873	7022
228897	379191	218	228897	85:2175.0 86:15465.0 88:775.0 89:1916.0 92:35.0 96:45.0 99:374.0 100:10426.0 101:957.0 102:2358.0 103:1587.0 104:621.0 107:2518.0 108:347.0 110:2033.0 112:51.0 114:1384.0 115:766.0 116:1066.0 117:2416.0 118:1178.0 119:67.0 120:43.0 121:26.0 127:489.0 128:				16682	15636	18335	21255	22360	19145	19166	18608	15092	17819	19185	21817	17388	16454	18908	17088	17922	16448	15930	18968	16204	18833	15752	18309	18303	16020	17013	20300	16818	16809	14919	16920	14491	21613	19330	18746	17034	21061	15745	17182	19871	18195
229073	254699	228	229073	85:656.0 87:1482.0 88:7764.0 89:812.0 90:1847.0 92:1151.0 94:2619.0 96:4023.0 97:56061.0 98:15589.0 99:2716.0 100:3097.0 101:3087.0 102:1011.0 103:4714.0 104:91.0 105:2730.0 106:3001.0 107:23878.0 108:1228.0 109:868.0 110:28126.0 112:727.0 113:815.0 114:2				4439	6259	4491	5489	4626	4084	4363	6725	5666	4639	8987	4629	6013	4688	4084	4593	4113	5984	5482	3743	4213	4223	7286	7331	3731	3803	6692	4368	3693	3611	4011	5089	25921	4734	4659	4719	5229	4371	5284	5749	4745	9219
226865	552707	411	226865	86:232.0 88:67.0 89:266.0 90:46.0 92:149.0 94:26.0 95:121.0 96:93.0 98:4013.0 103:233.0 104:161.0 108:57.0 109:348.0 110:3272.0 111:113.0 114:294.0 115:141.0 117:527.0 118:96.0 120:52.0 122:288.0 124:40.0 126:54.0 129:29.0 130:1386.0 133:853.0 134:706.0 1				349	608	485	394	357	462	345	656	552	410	776	404	429	467	346	354	358	649	605	342	436	334	879	694	365	255	683	503	356	369	314	426	594	434	321	428	579	498	489	670	331	944
224521	352767	218	224521	85:2272.0 86:51809.0 87:6247.0 88:2574.0 89:106.0 90:711.0 91:750.0 92:405.0 95:417.0 98:2034.0 100:28378.0 101:3760.0 102:3364.0 103:5370.0 104:75.0 105:1074.0 106:112.0 107:205.0 108:55.0 109:15.0 111:552.0 112:58.0 113:410.0 114:1123.0 115:2748.0 116:2				72454	64972	78339	86573	93249	78644	81366	76024	62843	79562	79031	91967	73516	71427	80714	70452	76185	70241	66944	78738	67956	77582	64725	75612	79296	70988	68324	85895	71557	69960	64541	69358	65268	91001	83411	78953	70132	90639	63217	72784	84861	77244
pyrazine 2,5-dihydroxy	396061	241	203238	85:1007.0 86:1103.0 87:107.0 88:47.0 89:23.0 90:12.0 91:198.0 92:179.0 93:110.0 95:19.0 96:54.0 97:524.0 98:714.0 99:495.0 100:918.0 101:208.0 102:6.0 103:528.0 104:8.0 105:43.0 106:5.0 107:79.0 108:58.0 109:49.0 110:114.0 111:358.0 112:140.0 113:1794.0 1	15532987	n/a		741	719	624	707	753	633	558	808	922	787	845	600	1122	803	754	888	466	728	832	659	627	918	591	781	705	684	863	786	628	689	639	885	1306	826	633	1120	836	625	679	907	710	1170
281178	258298	144	281178	87:159.0 95:2091.0 101:472.0 107:1282.0 109:2533.0 112:61.0 126:14.0 130:149.0 131:22061.0 132:2780.0 137:4.0 138:196.0 139:350.0 143:925.0 144:13349.0 145:1614.0 153:307.0 166:159.0 173:501.0 176:30.0 183:486.0 186:709.0 199:40.0 205:773.0 206:4.0 214:38				13005	11673	16907	16675	17912	13814	16374	17174	12450	16980	14242	20177	15217	13806	17297	13776	16423	12082	13039	16937	13899	17245	12462	14757	15232	13512	13803	16395	12715	15096	11678	14347	11101	19707	16660	15595	13775	19491	12059	14290	16238	11938
224547	538202	275	224547	85:40.0 86:273.0 87:698.0 89:297.0 90:338.0 91:551.0 92:44.0 93:216.0 94:144.0 95:313.0 98:140.0 99:15.0 104:115.0 107:1783.0 108:752.0 109:171.0 110:1994.0 111:280.0 114:51.0 115:15.0 117:787.0 119:3.0 121:265.0 122:420.0 123:8.0 124:228.0 126:270.0 127:				4001	3602	4744	5436	5524	4563	4674	4159	3590	4234	4159	5626	3845	3797	5194	4113	4728	3783	3887	5069	4132	4567	3502	4355	5220	4234	3776	5508	4041	4485	3672	3821	3648	5525	4805	4399	3858	5577	3246	4070	4508	3730
223597	1204498	297	223597	95:171.0 96:54.0 103:45.0 113:54.0 118:26.0 121:132.0 129:1581.0 130:88.0 142:10.0 162:17.0 165:14.0 166:4.0 177:26.0 178:51.0 187:8.0 192:44.0 193:207.0 194:99.0 195:12.0 197:76.0 207:906.0 208:257.0 209:213.0 211:32.0 218:11.0 222:7.0 224:1.0 235:17.0 2				937	1359	1913	1619	1498	1358	942	1042	1479	1094	1373	2222	680	1177	1918	1343	1651	2092	2062	2157	1345	2092	1878	1145	2520	1272	1162	1389	3350	1926	1966	538	1205	2013	1816	845	1415	2268	1022	1524	1608	1318
mannitol	665209	103	210512	87:53.0 88:13.0 89:235.0 90:5.0 91:1317.0 92:880.0 93:94.0 97:12.0 101:206.0 102:10.0 103:1703.0 104:117.0 105:44.0 113:10.0 115:13.0 116:26.0 117:949.0 118:40.0 119:26.0 121:2.0 127:13.0 129:770.0 130:38.0 131:241.0 132:7.0 133:424.0 134:66.0 135:4.0 138	6251	C00392		24818	17474	2285	19274	1539	3224	19016	18665	19625	3211	17766	1525	467	22793	9452	18592	12738	19498	3906	15656	18573	34225	16139	2228	22597	5666	16244	23129	19860	2987	29478	798	15763	15577	1981	196186	3263	15486	2307	2811	8113	21017
2-phenylpropanol	319992	193	212666	85:59.0 86:5.0 89:1243.0 90:122.0 91:1163.0 92:27.0 97:65.0 99:35.0 100:52.0 102:27.0 103:183.0 104:26.0 105:173.0 112:85.0 115:220.0 117:128.0 118:71.0 119:219.0 121:14.0 123:26.0 128:29.0 130:64.0 131:41.0 135:54.0 139:72.0 142:71.0 143:48.0 146:16.0 14	447661	n/a		36108	34292	41325	47859	51783	34173	39024	40081	32162	44545	31513	48903	40383	44015	51176	38374	44915	34897	35012	37356	35433	40222	30207	40366	42447	40800	35016	43889	36493	39759	36332	35470	27375	50271	46127	42304	33874	50636	30728	35473	42011	35200
269983	494553	263	269983	85:1289.0 86:84.0 87:1978.0 88:29.0 90:147.0 91:1633.0 94:217.0 95:249.0 96:73.0 97:376.0 99:370.0 100:393.0 102:54.0 103:17.0 105:324.0 107:75.0 108:462.0 109:68.0 110:11057.0 111:173.0 112:43.0 113:30.0 114:11920.0 115:2542.0 116:895.0 117:98.0 118:980.				5175	4433	5891	6925	6732	6129	6569	5637	4918	5427	7210	6096	5807	5107	5914	5708	5907	5109	5507	5402	5065	5764	5314	8693	5632	5600	5111	6187	6221	5283	4487	5082	9636	6883	5720	5872	5378	6577	4404	5773	6147	6813
272306	253512	193	272306	85:369.0 86:1519.0 87:4761.0 88:264.0 89:92.0 90:606.0 91:434.0 92:100.0 93:386.0 94:50.0 95:366.0 96:763.0 97:5304.0 98:1948.0 99:25.0 100:1824.0 101:101.0 102:92.0 103:88.0 104:325.0 105:661.0 106:923.0 107:3989.0 108:984.0 109:155.0 110:2038.0 111:492.				13669	12286	17813	19016	17724	14570	18948	19795	14554	18364	14088	19630	10624	15738	17259	15233	17596	14704	14152	17085	14263	18890	14048	15733	15997	16097	14684	16114	12786	15661	11320	10545	12639	19751	19110	15163	14169	19925	17732	15425	16851	12623
231657	286430	187	231657	85:4137.0 86:2640.0 87:774.0 88:2861.0 89:2413.0 90:620.0 93:1415.0 94:1220.0 95:11260.0 96:1824.0 97:421.0 98:14633.0 99:2747.0 101:4297.0 102:630.0 105:5466.0 106:409.0 108:166.0 110:95.0 111:333.0 112:1569.0 113:631.0 114:410.0 115:818.0 116:7222.0 117				3100	2435	3805	4459	3512	2973	3203	3617	2428	3442	2619	4583	4283	3558	4712	3149	3051	2653	2630	3059	2897	3514	3347	3517	5222	3010	3610	3749	2578	3240	2624	3999	4542	3020	2924	3977	3119	3961	2729	1839	3485	3697
281107	206299	119	281107	85:103379.0 86:56871.0 90:915.0 91:29797.0 93:14434.0 95:5068.0 96:4668.0 100:12632.0 101:2970.0 107:34519.0 108:28.0 109:7537.0 110:4638.0 111:1375.0 112:13197.0 113:376.0 119:136683.0 124:203.0 125:14134.0 126:7885.0 127:8704.0 128:2133.0 130:32449.0 13				165587	185600	271758	259841	246780	191954	271146	278904	206557	255090	227063	311408	229232	219772	275114	229103	255178	185391	229035	175932	206134	295459	219304	205433	247332	259700	220084	245703	155579	251757	131689	189213	186045	290885	274408	207299	186501	281521	231000	224816	246307	188283
200411	595016	116	200411	85:73.0 86:32.0 87:930.0 88:807.0 89:746.0 90:87.0 91:70.0 92:51.0 94:8.0 95:63.0 96:6.0 97:4.0 98:23.0 99:167.0 100:40.0 101:2362.0 102:298.0 103:4271.0 104:348.0 105:300.0 106:8.0 107:8.0 109:24.0 110:3.0 111:31.0 112:1.0 113:207.0 114:29.0 115:254.0 11				5991	7437	6160	6097	5286	7102	7451	8129	5478	8401	5663	6553	4890	7903	5881	6560	3131	6633	5152	6348	6626	5952	6301	9521	5319	5611	7970	7423	5104	4751	7034	7004	11524	3371	5942	7581	7502	8781	5670	5863	6646	8562
224849	535229	275	224849	85:260.0 87:7.0 90:219.0 91:6.0 93:245.0 100:72.0 101:66.0 102:231.0 103:485.0 104:1.0 107:1072.0 108:365.0 109:305.0 110:2101.0 114:511.0 116:93.0 117:416.0 118:329.0 119:200.0 120:7.0 121:30.0 122:78.0 123:49.0 126:530.0 130:1260.0 132:11.0 133:198.0 13				725	670	847	997	942	697	902	902	889	950	853	1137	791	962	1361	824	966	722	740	1046	795	829	919	1001	1158	865	733	1122	785	791	855	772	1181	1285	892	905	1169	1101	817	734	947	1122
239859	797156	218	239859	86:35.0 90:2.0 92:58.0 100:1935.0 101:118.0 102:58.0 106:68.0 108:50.0 110:16.0 114:106.0 115:196.0 116:351.0 117:18.0 128:2.0 130:142.0 131:321.0 132:448.0 138:15.0 144:93.0 146:3657.0 147:1107.0 148:941.0 150:91.0 158:4.0 160:94.0 161:54.0 172:67.0 173:				1809	4870	2438	2793	3102	2799	3539	5157	3026	3920	2192	3222	3827	7776	4052	3879	2662	2740	4476	3014	3421	7205	2424	1826	1900	3531	2677	2914	3072	2641	6129	2748	2458	3440	5574	4890	4464	2587	1198	7031	4994	2609
lactic acid	215380	191	228677	85:1068.0 86:183.0 89:1393.0 90:432.0 91:326.0 92:736.0 93:602.0 94:101.0 96:44.0 97:26.0 102:3921.0 103:3541.0 104:272.0 105:2212.0 106:1149.0 107:21191.0 108:1940.0 109:1184.0 110:6666.0 111:560.0 112:69.0 114:303.0 115:3026.0 116:220.0 117:75044.0 118:	61503	C00256		289492	304819	332726	261582	463090	216811	533053		390517	527829	249577	370509	276063	455669	107023	289105	542092	314946	432529	450158	456316	330681	261987	347101	318292	511564	292212	250783	150087	384526	314620	373893	321462	494476	314622	285796	188177	314110	512399	541006	451998	296210
281125	566380	94	281125	85:12.0 89:6.0 92:1208.0 93:1905.0 94:18607.0 95:1659.0 96:21.0 100:196.0 102:459.0 103:683.0 104:68.0 106:454.0 107:756.0 108:3935.0 109:6265.0 110:2770.0 112:93.0 114:138.0 116:188.0 117:108.0 118:360.0 119:542.0 120:798.0 121:930.0 122:216.0 124:220.0				16604	24895	8881	23793	1642	25189	11373	34523	24685	13999	29534	9846	21886	5835	5108	20754	3003	29474	25343	7713	22651	10401	63324	28665	2795	14395	20656	4088	1933	4616	3091	16934	20674	4314	11162	4851	22485	7514	19784	26792	13741	29955
urea	331223	171	199770	85:10021.0 86:8226.0 87:25184.0 88:3654.0 89:1713.0 90:2155.0 91:361.0 92:255.0 93:55.0 94:28.0 95:54.0 96:993.0 97:1524.0 98:1720.0 99:75508.0 100:40526.0 101:12058.0 102:6516.0 103:4893.0 104:1169.0 105:2159.0 106:314.0 107:362.0 108:33.0 109:27.0 110:1	1176	C00086		663698	569848	659779	745955	695389	735761	916948	728587	169115	704033	702259	571354	695905	699811	410431	619520	815878	121900	173743	603072	675753	830191	578738	676176	686350	1265815	669804	607425	2578890	832308	743533	597060	663615	323632	1033750	789830	759023	630461	490186	165326	772036	324768
226909	861795	290	226909	87:12.0 88:130.0 91:71.0 94:32.0 95:10.0 97:169.0 100:87.0 103:214.0 105:254.0 110:114.0 112:82.0 114:30.0 116:248.0 118:32.0 124:48.0 128:42.0 129:46.0 135:70.0 136:288.0 142:9.0 144:252.0 151:164.0 152:67.0 157:7.0 158:21.0 168:84.0 171:65.0 172:89.0 17				1411	1013	2289	2288	1222	1049	4418	1775	1388	1273	1727	2737	2643	2610	1382	1752	1704	744	922	1522	950	1114	3302	1235	1604	1376	1331	2867	1305	1310	1251	1330	2738	2708	1161	1619	1044	1813	1943	886	1349	2395
281328	278237	220	281328	85:2282.0 86:3239.0 88:316.0 89:231.0 90:323.0 92:26.0 97:184.0 99:756.0 100:2745.0 101:948.0 106:7.0 107:936.0 108:171.0 110:9.0 111:513.0 112:28.0 114:492.0 116:276.0 117:22692.0 118:2073.0 119:399.0 120:15.0 121:3.0 125:282.0 127:783.0 132:57.0 133:240				3041	2522	3284	3439	3407	3209	3306	3437	2638	3468	3126	3714	2934	2851	3005	3101	3182	2627	2706	3159	2676	3290	2605	3166	3229	2918	2972	3646	2741	2745	2430	3028	1710	3443	3272	3039	2722	3728	2986	2768	3248	2618
228927	313497	165	228927	85:170.0 86:164.0 87:634.0 89:719.0 90:320.0 92:432.0 93:234.0 94:1279.0 95:3915.0 96:4320.0 97:4300.0 98:4249.0 99:271.0 100:2860.0 101:1572.0 103:515.0 104:1548.0 105:246.0 106:640.0 107:936.0 108:733.0 109:2437.0 110:13457.0 111:3919.0 112:1575.0 113:4				26286	22046	17347	32936	38878	25251	32837	29144	22727	32104	26304	34688	7157	29905	31770	25663	29610	22704	24581	31936	23839	32453	20941	28516	31712	24079	18167	33822	28190	27097	26495	25387	25454	35901	33734	32099	25350	35357	24768	26868	33162	24987
benzylalcohol	281322	165	200353	85:355.0 87:17.0 89:148.0 90:68.0 91:2918.0 92:258.0 93:18.0 95:12.0 96:1.0 99:7.0 100:27.0 103:17.0 104:25.0 105:86.0 106:17.0 107:34.0 108:4.0 110:11.0 112:54.0 113:18.0 114:7.0 115:13.0 116:5.0 117:153.0 118:24.0 119:69.0 120:9.0 121:5.0 122:6.0 123:5.	244	C00556		14323	13527	16961	17577	17227	14352	16642	22882	13779	18491	13560	18797	14965	12515	18208	14333	17110	13852	13870	16869	12227	17777	12586	15445	16829	15573	14423	18726	15118	15890	12814	14301	12673	21770	18472	14719	15554	21700	13802	14443	16908	14792
227298	374409	211	227298	85:1689.0 86:3277.0 88:582.0 89:100.0 92:215.0 93:141.0 94:529.0 95:106.0 96:8291.0 97:1163.0 98:3996.0 99:1513.0 100:12655.0 101:1217.0 102:453.0 103:416.0 104:36.0 105:2.0 106:394.0 108:136.0 109:52.0 110:1728.0 111:748.0 112:805.0 113:6660.0 114:1075.0				1351	1557	1568	1608	1422	1545	1478	1900	1707	1800	1933	2033	1791	1290	1390	1415	1427	1769	1482	1247	1633	1349	1953	1602	1347	1304	1592	1565	1458	1177	1236	1516	1969	1697	1549	1864	1532	1733	1440	1571	1673	2708
227353	306967	218	227353	85:3203.0 86:8248.0 87:307.0 90:422.0 91:10.0 93:203.0 96:17.0 97:337.0 99:22.0 100:4388.0 101:139.0 102:225.0 103:2917.0 108:242.0 110:735.0 111:790.0 112:183.0 113:344.0 114:1314.0 115:143.0 116:34.0 117:280.0 118:13.0 122:109.0 125:12.0 126:130.0 127:4				2052	2112	2332	2621	2679	2227	2412	2584	2058	2390	2584	2510	2274	1733	2308	2129	2118	2132	2060	2257	2045	2310	2145	2634	2182	2076	2092	2606	2062	1871	1809	1747	2009	2305	2285	2263	2286	2469	1833	2232	2507	2669
201887	1200427	316	201887	85:2.0 86:8.0 87:5.0 89:34.0 91:1089.0 92:53.0 93:14.0 94:6.0 95:132.0 96:11.0 97:18.0 98:5.0 99:78.0 101:26.0 102:59.0 103:656.0 104:27.0 105:785.0 106:33.0 107:359.0 108:59.0 109:63.0 113:13.0 115:819.0 116:203.0 117:475.0 118:86.0 119:616.0 120:70.0 12				1311	1769	1526	1884	1956	1297	1109	1540	1367	1144	1442	1749	880	1562	1700	1574	1182	1625	1365	1185	1683	1982	1604	1885	1761	1640	1597	1913	2544	1397	1435	681	1354	1831	1482	821	1589	1628	1194	1634	1507	1818
227743	627324	156	227743	85:107.0 86:173.0 87:50.0 88:366.0 90:114.0 94:141.0 96:309.0 98:158.0 99:162.0 100:330.0 101:120.0 108:75.0 110:143.0 112:1303.0 113:33.0 114:1140.0 115:228.0 122:70.0 123:9.0 124:33.0 127:256.0 128:338.0 129:193.0 132:47.0 138:42.0 139:17.0 140:215.0 14				23859	20565	26927	28175	25226	28237	22501	28979	20659	21923	28372	16190	21343	14293	15018	21634	11092	26476	22065	16378	21288	20030	19117	30566	18382	17644	21447	17005	21527	12974	22881	22801	16694	14976	19938	28055	23492	16648	15296	23892	16708	26410
threonic acid	497167	292	199262	86:2.0 89:214.0 90:4.0 92:93.0 93:57.0 95:1.0 99:8.0 100:9.0 101:144.0 102:985.0 103:1234.0 104:105.0 105:26.0 107:28.0 108:10.0 113:18.0 115:5.0 116:4.0 117:1493.0 118:105.0 119:89.0 123:1.0 127:13.0 129:137.0 130:742.0 131:341.0 132:49.0 133:624.0 134:7	439535	C01620		3367	2102	3790	4626	4870	1254	4253	1409	4391	3247	8015	2577	2451	10225	3685	3922	3601	2986	12020	3429	9766	10140	3257	6062	9551	4891	8079	6569	3618	3424	1879	13804	5555	3612	5445	3392	2976	8493	6682	3178	4700	9025
218520	232023	147	218520	85:508.0 86:130.0 87:579.0 93:146.0 94:67.0 95:143.0 96:115.0 97:178.0 98:75.0 99:442.0 101:397.0 102:32.0 103:4685.0 104:570.0 105:903.0 107:150.0 110:113.0 111:35.0 112:43.0 113:133.0 114:335.0 115:499.0 117:1425.0 118:327.0 119:163.0 120:220.0 122:4.0				694307	680806	929181	959280	955747	787222	963510	976750	751209	967243	835952	1033286	799123	866285	922703	781756	920240	714414	810677	931443	769384	1002612	761180	863645	855918	877395	767118	881606	667393	804700	614864	748427	663315	1093357	985150	793458	794475	1061555	855955	831709	927705	740099
tocopherol alpha	1067178	237	199211	85:104.0 87:137.0 88:41.0 89:11.0 90:4.0 91:148.0 93:40.0 95:122.0 96:126.0 97:86.0 98:19.0 99:27.0 100:8.0 101:6.0 103:9.0 104:17.0 105:75.0 106:13.0 107:39.0 109:47.0 110:20.0 111:25.0 112:5.0 114:8.0 115:35.0 116:21.0 117:59.0 118:15.0 119:154.0 120:35	14985	C02477		29783	11066	12992	26836	10778	19278	30177	13286	18825	21343	17415	16151	13081	21622	19598	24011	34030	23300	24056	22133	16543	26013	16011	16322	18940	17747	11414	18948	21287	22930	25633	10392	13836	12973	34888	16429	15022	30330	8384	11479	22557	13741
glyceric acid	373972	189	228009	85:1195.0 86:478.0 87:434.0 88:161.0 89:1066.0 90:229.0 94:1.0 96:9.0 99:243.0 100:283.0 101:1791.0 102:6647.0 103:5903.0 104:836.0 105:324.0 106:59.0 107:480.0 108:13.0 109:43.0 110:37.0 112:44.0 113:165.0 114:56.0 115:300.0 116:271.0 117:3735.0 118:267.	439194	C00258		18703	15148	18639	27622	17596	12600	36996	15027	16777	26006	26845	20266	10502	25477	16785	29837	22450	20840	21569	25366	27859	23920	19551	24205	24468	16762	20195	23997	16434	27342	14548	28943	17543	28506	32238	17215	20695	45806	25610	15123	35063	23906
211916	440480	100	211916	85:398.0 86:294.0 87:130.0 88:150.0 89:94.0 90:8.0 91:54.0 92:19.0 93:19.0 94:25.0 95:15.0 96:151.0 97:80.0 98:328.0 99:122.0 100:1271.0 101:544.0 102:986.0 103:94.0 104:76.0 105:9.0 106:12.0 107:34.0 108:97.0 109:17.0 110:391.0 111:32.0 112:135.0 113:99.				14818	15754	14044	16675	13721	14200	12770	16201	11166	13860	19240	14670	16011	13048	11831	13771	11649	13826	14358	12164	11552	13477	12989	16775	12164	12604	12522	14781	11676	10366	11324	13351	13726	13437	13544	14602	2260	13917	16481	18951	13236	20136
224539	566862	296	224539	85:1190.0 86:109.0 88:351.0 90:18.0 91:292.0 92:122.0 93:639.0 94:1784.0 95:1110.0 96:616.0 97:604.0 98:858.0 99:290.0 100:623.0 101:243.0 102:38.0 103:318.0 104:119.0 105:270.0 106:110.0 108:1088.0 109:765.0 110:1421.0 111:1130.0 112:860.0 113:293.0 114:				397	755	493	529	562	534	448	842	480	332	820	533	683	676	500	414	374	793	736	438	391	460	677	897	432	288	793	515	516	410	460	538	1074	512	549	800	762	490	672	653	527	512
226855	511474	270	226855	85:3.0 86:142.0 89:5.0 91:84.0 93:77.0 94:72.0 97:3.0 98:322.0 100:424.0 101:43.0 103:13.0 108:344.0 110:605.0 111:3.0 113:110.0 114:841.0 115:12.0 117:9.0 124:61.0 125:434.0 126:5.0 129:13.0 133:30.0 134:501.0 136:2.0 138:16.0 140:70.0 142:55.0 143:120.0				3460	3168	3130	4177	2146	4097	2970	3074	2590	3718	2921	4490	5129	1775	2338	3546	1613	3141	2545	3479	3565	3156	4098	2697	1980	3709	3408	3864	1373	2279	1342	3649	2676	1699	2951	2100	2848	2757	3237	3002	3633	5288
cholesterol	1077630	129	199589	85:8465.0 86:846.0 87:1313.0 88:613.0 89:4318.0 90:691.0 91:59552.0 92:10176.0 93:46448.0 94:8829.0 95:64063.0 96:5451.0 97:14066.0 98:1361.0 99:3371.0 100:452.0 101:6226.0 102:1060.0 103:6277.0 104:3411.0 105:54128.0 106:11341.0 107:43357.0 108:8473.0 10	5997	C00187		695359	572670	654687	913272	708901	709820	610587	642995	632373	668712	625143	788657	611254	780114	807895	772421	769763	724055	819732	704844	622801	739349	571872	654246	726636	724340	504724	869882	649659	746302	816846	450276	505890	1189398	502210	654580	580720	936641	618804	673278	805128	723508
217838	289054	214	217838	85:1007.0 86:7602.0 87:381.0 88:141.0 89:412.0 90:133.0 91:114.0 92:109.0 93:38.0 96:198.0 97:814.0 98:5171.0 99:2513.0 100:6837.0 101:658.0 102:901.0 106:119.0 107:148.0 109:41.0 110:75.0 111:97.0 112:258.0 113:1391.0 114:804.0 115:264.0 116:437.0 118:11				583	1037	677	797	700	860	481	1346	811	587	898	350	735	781	300	526	211	1147	876	344	757	405	1085	1294	335	345	1138	343	601	198	840	826	880	273	455	973	996	321	636	1055	643	1150
281363	710284	290	281363	86:58.0 90:56.0 95:31.0 97:574.0 98:362.0 100:618.0 101:151.0 102:85.0 103:3009.0 104:76.0 108:21.0 111:137.0 112:43.0 113:258.0 114:259.0 116:677.0 117:259.0 124:22.0 128:174.0 129:7.0 130:375.0 132:79.0 133:252.0 140:253.0 141:104.0 142:2.0 143:47.0 144				1859	1703	834	1544	500	1038	1863	1046	1725	763	2290	1670	1689	1664	501	1621	669	1828	2450	907	939	730	2014	1432	817	1325	1592	988	2050	381	685	1002	961	533	677	563	1616	595	1038	2280	801	3214
281185	226102	95	281185	91:5089.0 92:2691.0 93:4403.0 94:2716.0 95:15896.0 96:11210.0 97:147486.0 98:12255.0 99:3475.0 100:864.0 101:3304.0 102:1972.0 103:7704.0 104:3306.0 105:50803.0 106:10021.0 107:7900.0 108:1996.0 109:8349.0 110:6802.0 111:22023.0 112:57528.0 113:5499.0 114				15173	11069	10307	14852	19984	23784	16162	15802	13208	16816	13747	17998	23894	18472	10726	15292	11564	9465	9641	16982	22505	17559	28848	9192	25448	16162	23019	11354	11927	14179	14064	22397	6590	18201	16998	8503	23959	30265	26836	7489	14621	15441
228900	243069	125	228900	85:139093.0 86:28809.0 87:2178.0 88:1466.0 89:416.0 91:3058.0 92:450.0 93:1799.0 94:303.0 95:3741.0 96:647.0 97:449.0 99:94.0 100:8406.0 101:1265.0 102:936.0 103:1030.0 105:310.0 106:304.0 107:4983.0 109:2099.0 110:20.0 111:150.0 112:2571.0 113:121.0 114:				15435	16193	20133	20575	22356	18096	22402	23967	18357	20980	19412	23264	17720	15261	22698	17669	20767	17542	19400	21789	16030	21916	17079	21439	19812	19437	17401	20093	15474	19125	14005	16779	16833	24993	24109	17889	17835	24951	13318	19547	21562	17703
217866	237804	228	217866	85:1042.0 86:1495.0 87:337.0 88:822.0 89:135.0 90:563.0 91:1465.0 92:533.0 93:27.0 95:54.0 96:97.0 97:410.0 98:440.0 100:1472.0 101:1182.0 104:321.0 105:204.0 107:465.0 108:821.0 109:310.0 110:14638.0 111:1191.0 112:524.0 113:2468.0 114:134.0 115:918.0 11				106284	129084	132304	138163	133856	106471	119970	151298	115390	132764	166682	136755	136703	116457	119853	110927	124757	124776	121373	113263	113088	132004	138904	146265	113541	103301	132758	115184	97398	102957	93213	115322	118322	138163	129242	107319	123917	127577	132510	130910	132527	161747
benzoic acid	338043	179	211970	85:107.0 86:2.0 89:295.0 90:77.0 91:199.0 92:26.0 93:34.0 94:6.0 95:15.0 99:6.0 100:568.0 101:59.0 103:359.0 104:77.0 105:12135.0 106:1028.0 107:108.0 108:16.0 109:26.0 110:46.0 113:1.0 114:119.0 116:215.0 117:244.0 118:31.0 119:114.0 120:50.0 121:73.0 12	243	C00180		28796	26538	28733	32743	34527	30954	61471	32874	25892	34967	39280	45545	33541	31962	29519	33198	29872	31738	27072	36673	33709	28958	28270	34199	27279	26639	28144	30862	25209	30583	27908	24757	44519	36682	38305	35338	40751	40621	26516	40763	36851	32574
216428	505415	223	216428	85:214.0 86:24.0 91:566.0 92:31.0 93:250.0 94:32.0 95:117.0 97:120.0 99:28.0 100:19.0 101:44.0 102:7.0 103:130.0 105:468.0 106:28.0 107:263.0 108:40.0 109:139.0 110:14.0 111:23.0 112:11.0 115:161.0 117:1974.0 118:167.0 119:169.0 121:97.0 122:2.0 123:294.0				1652	1708	3719	2142	1257	1929	1456	2358	1552	3563	1400	6589	2640	4012	2367	3068	2672	1699	1990	1412	2197	3353	2090	4240	1249	1583	3794	5349	2573	952	3162	2853	1827	6177	2613	2199	3917	5168	2275	3603	3021	3032
281111	236617	112	281111	85:1894.0 86:731.0 91:8062.0 92:909.0 93:5306.0 94:1518.0 95:24851.0 96:3922.0 97:14949.0 98:3124.0 99:580.0 104:1.0 107:2501.0 108:1248.0 109:9243.0 110:3096.0 111:5389.0 112:34805.0 113:11463.0 114:265.0 119:4114.0 120:361.0 121:633.0 122:1722.0 123:675				27662	27778	38148	38643	46038	25723	42832	46138	31639	41170	35620	42480	36710	26863	33916	32132	37238	24150	36880	37614	31204	46070	30758	35550	33734	35251	35370	34805	31815	33049	24720	28836	31901	44839	43561	30148	31455	43792	29371	35348	38658	26181
arginine + ornithine	619420	142	199796	85:16.0 86:326.0 87:20.0 89:2.0 90:3.0 91:42.0 92:24.0 93:6.0 94:2.0 95:5.0 96:10.0 99:8.0 100:288.0 101:27.0 102:107.0 103:10.0 104:2.0 105:1.0 107:15.0 108:5.0 109:3.0 110:11.0 112:6.0 113:27.0 114:51.0 115:4.0 116:25.0 117:19.0 118:8.0 119:3.0 122:6.0	232	C00062		58660	62849	137167	44834	74395	42044	41334	66565	96214	65043	108470	44456	89795	85748	50161	97077	26767	75691	55725	50188	136666	46713	37728	72510	53745	99960	102656	100706	87865	33952	55759	104369	102274	38549	84673	104027	91128	38028	55366	82151	91420	179028
281124	490965	291	281124	85:818.0 86:214.0 90:17.0 93:386.0 96:216.0 97:311.0 99:5.0 100:890.0 101:154.0 105:5.0 107:271.0 108:58.0 109:62.0 111:753.0 112:1211.0 113:498.0 116:53.0 122:244.0 124:186.0 126:79.0 127:889.0 128:392.0 129:248.0 130:350.0 134:845.0 138:1333.0 140:290.0				367	3503	251	402	339	306	385	2106	1565	269	1594	302	886	1642	230	524	273	770	695	250	343	505	2783	1545	179	436	3168	781	575	253	589	706	3410	222	711	649	1016	226	1991	1352	223	2007
281145	216493	97	281145	85:1696.0 86:5228.0 87:710.0 88:6689.0 91:14115.0 92:1134.0 93:3124.0 94:617.0 95:17134.0 96:21951.0 97:1046856.0 98:76482.0 99:5909.0 100:1503.0 101:3272.0 102:1013.0 103:4775.0 104:1151.0 105:16924.0 106:1507.0 107:3967.0 108:568.0 109:3083.0 110:1927.0				739949	708459	971358	1051191	1022367	664943	1002352	1063142	810411	966013	822779	1129366	818102	995662	1009087	828999	991225	746716	864233	974345	795413	1078951	806230	896023	935144	976792	830518	947141	702165	909811	542105	776306	776459	1176995	1095172	819072	814919	1141436	879974	856841	989040	684034
202599	570779	173	202599	85:105.0 86:55.0 87:119.0 88:30.0 89:3.0 90:610.0 91:2.0 92:22.0 93:1.0 94:4.0 95:1.0 96:11.0 97:8.0 98:9.0 99:5.0 100:167.0 101:6.0 102:100.0 103:14.0 105:7.0 106:5.0 107:14.0 109:2.0 110:8.0 112:21.0 113:38.0 114:29.0 115:197.0 116:347.0 117:27.0 118:4.				3707	6950	7395	6528	6692	5085	6835	13485	9338	6190	8383	12657	7550	8424	8904	9088	11506	7600	11475	12993	9091	8165	6038	8787	9766	6791	8191	11642	7611	9624	5501	5801	14599	6831	17162	4799	7284	8619	6356	10919	14425	14153
219174	506055	173	219174	85:60.0 86:200.0 87:23.0 88:83.0 89:12.0 90:67.0 91:140.0 92:98.0 93:66.0 95:83.0 99:2302.0 100:1266.0 101:242.0 102:139.0 103:1464.0 104:194.0 105:336.0 107:146.0 109:32.0 110:271.0 113:41.0 114:246.0 115:995.0 116:352.0 117:846.0 118:306.0 119:274.0 120				7772	8230	6336	9371	3669	7833	6311	13018	11023	6088	14333	3074	10855	5475	2457	7107	1658	12618	11139	2725	7452	4464	15183	10110	2947	5717	12328	3302	3448	1979	6418	8521	9887	2965	3917	7130	11668	3239	9260	11065	5583	19149
223905	257174	248	223905	85:312.0 87:11607.0 88:452.0 89:67.0 90:9.0 91:7.0 92:2.0 93:254.0 97:226.0 98:168.0 99:25.0 100:5648.0 101:2671.0 102:1089.0 103:9.0 105:19.0 107:921.0 108:113.0 109:243.0 110:485.0 111:4.0 113:17.0 114:1164.0 115:1848.0 116:39.0 117:188.0 118:100.0 119:				6661	7368	8323	8878	8555	7293	8728	9898	7823	8549	9166	9124	7552	6638	8030	7664	7687	7435	8057	8000	6988	8424	8807	8734	7156	8008	7996	7951	6249	7041	5762	7216	7100	9324	8927	7204	8038	9222	6639	8764	8330	8704
281119	883595	359	281119	90:46.0 101:19.0 103:2421.0 104:87.0 114:50.0 115:131.0 116:547.0 117:413.0 128:48.0 130:180.0 144:458.0 147:177.0 158:143.0 159:12.0 160:46.0 168:18.0 170:9.0 172:13.0 173:29.0 174:185.0 178:15.0 179:7.0 184:70.0 186:610.0 187:87.0 200:144.0 207:385.0 20				1128	1267	1167	1304	1084	1064	880	1625	1311	818	2037	679	1394	1149	832	1184	716	1677	1270	742	822	1007	1000	1919	972	1163	1513	935	1321	364	1745	1418	1844	709	994	1591	1274	922	936	1319	1177	2043
268590	282017	140	268590	85:2410.0 86:7035.0 87:437.0 88:233.0 89:408.0 90:1646.0 91:961.0 93:61.0 95:41.0 97:78.0 99:84.0 100:376.0 101:227.0 102:67.0 103:998.0 104:410.0 105:223.0 106:46.0 107:248.0 108:227.0 109:205.0 110:811.0 112:155.0 115:8.0 116:654.0 117:1791.0 118:401.0				7042	6321	9929	8770	11808	9319	10681	10642	5719	10389	8905	9102	10021	8420	7433	6155	6525	7091	5182	6265	8683	8384	7488	10165	6155	7186	8092	7931	7169	7059	5098	9609	6528	6937	9595	9358	7914	10845	9395	7315	10461	8784
281346	429630	218	281346	86:1920.0 87:55.0 88:45.0 90:51.0 100:2356.0 101:509.0 102:303.0 103:711.0 107:602.0 112:224.0 114:203.0 115:176.0 116:487.0 117:15.0 118:87.0 120:499.0 127:305.0 131:567.0 132:64.0 137:528.0 138:124.0 140:217.0 142:220.0 143:107.0 144:772.0 146:469.0 147				3997	4254	4360	4825	2929	4119	3186	4631	4457	3219	5533	2177	4603	3368	1433	3706	1204	4749	4196	1841	3297	2358	5423	5278	1332	2806	5057	2354	2840	1399	4007	4375	5195	1057	2570	4017	4822	1628	3580	4565	3578	6822
221574	354121	85	221574	85:4005.0 86:527.0 87:52.0 88:73.0 89:56.0 90:4.0 91:162.0 92:36.0 93:46.0 95:8.0 98:96.0 99:634.0 100:747.0 102:133.0 103:241.0 104:277.0 105:19.0 106:119.0 108:112.0 109:52.0 111:82.0 112:112.0 113:356.0 114:14.0 118:33.0 119:31.0 125:8.0 126:118.0 127:				7533	8337	9316	9694	10902	7998	10390	10368	7188	10042	7591	11915	7894	16359	9598	8119	9685	7617	7413	8344	7383	8250	8105	8987	9166	9396	8928	7380	9227	7760	7660	7580	6467	9776	10428	9506	7813	10793	9095	8498	8303	9052
tyrosine	671085	218	199781	86:146.0 89:83.0 90:81.0 91:229.0 92:32.0 93:14.0 95:8.0 96:2.0 98:21.0 100:3165.0 101:377.0 102:131.0 103:136.0 104:22.0 105:89.0 106:1.0 107:9.0 108:3.0 112:1.0 115:43.0 116:34.0 117:116.0 118:57.0 119:49.0 121:13.0 122:1.0 123:2.0 125:4.0 128:3.0 129:3	6057	C00082		138358	181405	217624	154009	201650	166120	104758	181972	193308	172436	142617	197337	132784	172052	143656	226082	233151	164134	126998	196811	187764	147153	117495	210101	194113	154228	125425	195817	158574	132521	105907	147010	168766	192824	175114	128510	171096	237048	147741	135190	236057	215069
227365	405467	114	227365	85:2.0 86:209.0 87:293.0 88:739.0 89:175.0 90:111.0 93:30.0 94:791.0 95:105.0 96:92.0 97:364.0 98:918.0 99:72.0 100:647.0 103:7951.0 104:441.0 105:23.0 108:455.0 110:251.0 114:12898.0 115:752.0 116:272.0 117:534.0 118:498.0 121:6.0 124:1098.0 125:26.0 126				6719	13807	6272	10532	3099	10239	5768	10828	14266	5635	23180	3977	15825	4638	2814	9380	2329	13491	11793	3496	7874	5007	9637	17020	3218	7282	12681	3456	2924	2341	4292	8989	14973	2808	4245	5297	13545	2934	9264	14440	6020	25432
226908	737073	213	226908	85:330.0 86:84.0 89:208.0 91:77.0 93:195.0 94:25.0 95:214.0 97:180.0 98:544.0 99:262.0 100:215.0 101:104.0 102:64.0 103:1006.0 104:184.0 105:325.0 107:59.0 108:65.0 109:38.0 110:48.0 111:289.0 112:185.0 113:159.0 114:58.0 115:224.0 116:153.0 117:1298.0 11				3479	3031	4003	3691	4338	2529	3658	2767	3672	2839	5267	4762	10593	3324	2240	2572	2540	2928	2557	3051	1870	2063	2825	3319	4571	5053	3406	4417	1836	1929	2809	5675	5397	2180	1696	6439	2598	2413	3532	3169	2737	8397
224526	334987	234	224526	85:79.0 86:3699.0 87:2020.0 88:4215.0 89:685.0 90:144.0 91:722.0 96:43.0 97:35.0 98:65.0 99:85.0 101:1.0 102:1453.0 103:9594.0 104:421.0 105:282.0 107:15777.0 109:68.0 110:2342.0 112:81.0 113:1648.0 114:16.0 116:2703.0 117:2854.0 118:273.0 119:6261.0 120:				7491	11846	6004	8670	3808	8471	5991	10340	11424	5859	15445	4813	12052	5276	3553	8014	3116	11896	10448	4238	7332	5451	10323	11943	3884	6618	11709	4568	3492	2945	4998	8430	12450	3696	5370	5843	10368	4172	8463	11651	6069	20732
215490	315917	130	215490	85:33.0 86:263.0 87:100.0 88:6.0 89:452.0 90:6.0 91:239.0 92:18.0 93:147.0 94:30.0 95:182.0 97:266.0 98:155.0 99:60.0 100:234.0 102:38.0 106:10.0 107:90.0 109:34.0 110:1.0 112:1.0 114:10.0 116:146.0 117:144.0 118:6.0 123:101.0 124:3.0 125:5.0 126:49.0 128				199104	267294	219301	256959	206498	225835	199647	324663	233073	202198	333506	185448	238042	183512	165635	184614	149806	257161	241743	164246	187866	176799	301027	311529	159306	175625	277043	175614	165051	140396	197153	219184	259967	176170	182310	234485	264426	184509	167548	261704	207589	372116
242405	291859	139	242405	85:2067.0 86:3612.0 88:122.0 89:3952.0 90:1695.0 91:38.0 92:5259.0 93:2320.0 94:691.0 97:13059.0 98:15291.0 99:1102.0 101:622.0 104:225.0 106:17311.0 107:8102.0 108:440.0 109:1040.0 110:2115.0 113:1746.0 114:3698.0 115:38.0 126:96232.0 127:62161.0 128:250				23955	30724	32452	36232	17277	23587	18442	38959	22874	22729	39689	32805	45300	37468	25060	28695	18746	22964	22675	21872	20898	24378	38813	27329	19360	18877	35938	19648	14995	21366	20415	30878	17451	28795	19664	33767	30915	19122	32274	27498	18481	42362
lauric acid	547810	117	201826	85:88.0 89:61.0 90:2.0 91:4.0 95:22.0 96:4.0 97:61.0 98:44.0 99:58.0 100:11.0 101:28.0 102:4.0 106:3.0 107:5.0 109:1.0 110:5.0 111:1.0 113:3.0 116:86.0 117:1390.0 118:117.0 119:31.0 121:3.0 127:4.0 129:590.0 130:69.0 131:269.0 132:366.0 133:68.0 143:11.0	3893	C02679		9311	11033	10717	6919	13638	12062	18689	13338	7543	13898	14687	14145	11990	12368	11683	9584	10761	7654	7680	13282	12930	13019	16306	19785	10430	8952	10509	11385	9504	10479	10690	9494	29619	19837	9502	10804	7146	12743	9754	7131	9154	16465
226910	793299	173	226910	85:1606.0 86:531.0 87:21.0 88:462.0 89:1113.0 90:16.0 95:73.0 98:180.0 99:172.0 100:792.0 101:237.0 102:959.0 103:5025.0 104:375.0 105:101.0 111:94.0 112:210.0 113:325.0 114:233.0 115:79.0 116:1191.0 117:2346.0 118:149.0 125:74.0 128:157.0 129:744.0 130:8				11129	15106	7793	12108	3938	7688	6381	9632	16990	6898	12007	5809	16014	5763	4446	9933	4535	15571	13313	5925	9208	7936	20959	4498	5692	11829	13426	9102	3230	3593	5813	9693	14566	3680	7261	5501	11785	5728	11140	13557	6937	24020
228885	250227	85	228885	85:1605677.0 86:112946.0 87:371.0 89:45.0 91:31372.0 92:3864.0 93:17292.0 94:4162.0 95:74078.0 96:12936.0 97:54720.0 98:6557.0 99:1241.0 102:530.0 103:486.0 105:2586.0 109:18132.0 110:2550.0 111:6952.0 112:624.0 114:801.0 115:2131.0 116:18093.0 117:1346.0				186812	188583	253426	278717	267719	222374	278422	306494	234595	287178	249545	258828	225990	240048	243004	218640	231903	202788	244843	250338	211732	297547	217169	272506	218670	267581	209825	218049	183424	210943	166698	203085	213913	270269	300779	201984	227002	274423	254501	251789	285362	194215
224522	279422	174	224522	85:2566.0 86:86423.0 87:7800.0 88:2605.0 89:19.0 90:528.0 91:259.0 92:22.0 93:397.0 94:275.0 95:176.0 97:27.0 98:2378.0 99:1783.0 100:42911.0 101:6456.0 102:5953.0 103:1216.0 104:489.0 106:23.0 107:3228.0 109:188.0 112:367.0 113:1943.0 114:1892.0 115:1528				324420	324597	428469	447170	451426	383966	397044	450753	350204	424713	395416	338135	380216	348749	264401	366739	190479	351856	366402	289530	356013	391120	348236	420057	280660	341290	370157	299280	332030	230206	303039	362525	317830	258155	405178	382480	372248	309618	295907	396628	419975	357852
281268	448141	174	281268	96:8.0 98:8.0 100:201.0 101:307.0 102:175.0 103:6854.0 104:185.0 110:187.0 111:1.0 114:211.0 116:2095.0 117:192.0 121:2.0 122:1.0 123:4.0 124:1070.0 129:383.0 131:22.0 142:4.0 143:2.0 144:55.0 146:3197.0 147:1928.0 148:206.0 158:126.0 160:521.0 168:7.0 16				7971	1878	7063	8504	7296	6828	6390	3413	3150	6637	1448	12737	4651	3385	10451	8114	7812	4887	6272	8675	5391	5497	3272	4561	11041	7826	3069	12470	4566	7815	3446	3798	6694	11106	2091	4358	3987	9395	2350	2483	7780	2437
229203	840930	94	229203	85:907.0 86:187.0 89:405.0 90:171.0 91:10198.0 92:2222.0 93:10321.0 94:6866.0 95:6339.0 96:1308.0 97:789.0 98:613.0 99:273.0 105:3212.0 106:1536.0 107:3759.0 108:1708.0 109:1648.0 110:339.0 111:309.0 112:180.0 116:1065.0 117:5315.0 118:692.0 119:1575.0 12				4364	5081	5857	1714	5128	1532	1488	2141	1678	3201	2028	1651	5666	1992	3060	1697	2209	1224	3152	2107	1301	4235	1345	2658	4406	6149	6615	3400	6594	1545	5949	2027	1884	1633	1583	1934	6993	3534	1232	6344	4233	4468
211898	413647	270	211898	85:1790.0 86:1860.0 87:504.0 88:2001.0 89:389.0 90:198.0 91:353.0 92:114.0 93:18.0 94:67.0 95:48.0 96:189.0 97:171.0 98:249.0 100:5136.0 101:1135.0 102:5186.0 103:795.0 104:529.0 105:137.0 106:109.0 107:197.0 108:501.0 109:42.0 110:2645.0 111:265.0 112:10				45341	43637	45030	54301	43949	46414	43025	50390	49105	42655	58295	42925	51064	41685	38891	44968	34936	45690	38421	38118	40726	41196	26845	45414	39499	39511	46585	43489	36504	32486	39419	44460	36431	41695	41366	45766	32423	40301	45485	47283	45672	56455
225272	416106	182	225272	85:452.0 86:378.0 88:79.0 89:293.0 90:142.0 92:397.0 93:443.0 94:357.0 95:125.0 98:176.0 99:439.0 100:2670.0 101:554.0 102:2228.0 103:640.0 104:218.0 105:201.0 106:324.0 107:1675.0 108:685.0 110:803.0 111:152.0 112:356.0 113:995.0 114:401.0 116:677.0 117:				1239	2991	2533	2157	1211	1109	819	2984	1854	1691	1969	156	5398	1821	1575	940	1231	2590	1617	442	2915	1799	4019	3606	1885	2156	4415	476	822	503	1639	4083	2856	1106	1574	2867	2023	488	261	1433	1005	3858
223717	477769	155	223717	85:176.0 86:2376.0 89:341.0 91:121.0 96:113.0 99:158.0 100:1377.0 101:251.0 102:264.0 106:11.0 108:26.0 110:92.0 112:11.0 114:115.0 116:149.0 117:5.0 120:80.0 121:97.0 123:126.0 125:642.0 128:211.0 130:221.0 131:80.0 134:2.0 137:32.0 139:117.0 140:27.0 14				4651	27614	8197	9370	16080	9798	7475	10848	10470	25461	34827	2484	4420	6014	2721	3557	22960	41746	27270	37081	15460	2663	1543	7389	5917	22973	6420	15056	7096	139	1952	9833	15065	36966	7084	35453	3553	3200	8090	4675	16602	6612
226848	827200	202	226848	85:655.0 86:957.0 87:144.0 88:381.0 89:150.0 91:189.0 92:40.0 97:855.0 98:426.0 99:428.0 100:701.0 101:847.0 102:547.0 103:8006.0 104:771.0 105:372.0 107:3.0 110:7.0 111:139.0 112:301.0 113:106.0 114:330.0 115:167.0 116:1925.0 117:1635.0 118:254.0 124:28.				27753	30187	17704	28068	11784	15812	22629	20995	33593	15870	37599	20351	31208	22775	11254	24052	12380	32143	35504	14920	18588	16424	68743	19247	16264	23800	29849	17877	18506	9315	19269	22200	33787	10196	15221	15925	26316	13291	23267	31267	15383	57440
239882	682727	228	239882	85:873.0 86:260.0 88:9.0 89:595.0 90:8.0 91:11.0 93:1.0 95:23.0 96:13.0 97:93.0 98:779.0 99:450.0 101:310.0 103:39.0 105:10.0 106:10.0 108:58.0 109:1466.0 110:6500.0 111:928.0 112:190.0 113:202.0 114:46.0 115:17.0 117:103.0 118:9.0 119:18.0 120:11.0 122:3				3746	5202	1573	3205	1503	1803	1538	1859	6466	1187	2561	1486	2179	1256	1012	3478	1235	4322	5311	1706	2286	2195	4975	863	1675	3981	3830	2617	912	847	2542	1039	4752	899	1765	3022	3571	1121	3065	5111	1376	4082
238358	640923	239	238358	86:14.0 94:268.0 95:171.0 96:114.0 98:716.0 103:272.0 107:266.0 108:160.0 109:34.0 110:3.0 112:60.0 121:643.0 122:466.0 123:411.0 124:344.0 130:368.0 135:276.0 136:86.0 137:2.0 138:196.0 139:24.0 140:433.0 141:21.0 142:2.0 144:51.0 149:502.0 150:986.0 151				2964	3069	2706	3305	2213	3075	2166	3609	2725	2352	4411	1719	3145	2278	1360	2446	1038	3217	2391	1462	2436	2193	2771	4166	1630	1931	3344	1778	1711	1206	2626	2553	2270	1290	1958	2598	3095	1335	2568	2929	1019	4130
281133	209890	120	281133	86:55024.0 87:8112.0 88:952.0 89:40990.0 90:7456.0 91:217557.0 92:26786.0 93:13081.0 94:848.0 95:14206.0 97:52998.0 98:3279.0 99:664.0 100:1550.0 101:1293.0 102:25032.0 103:139693.0 104:43516.0 105:1590172.0 106:134436.0 107:36829.0 108:3050.0 109:8817.0				362513	364823	539204	550018	529088	413764	577360	592822	435338	547138	485171	591725	453384	393548	534367	451120	528928	375866	483983	539510	445224	591143	436386	491796	472845	525907	432892	469584	349603	481080	303978	387363	374124	608799	593748	391831	443582	606038	445861	487051	546560	363804
monopalmitin-1-glyceride	901207	371	202859	85:631.0 86:60.0 87:31.0 88:69.0 89:113.0 91:26.0 92:8.0 93:48.0 95:909.0 96:19.0 97:532.0 98:174.0 99:191.0 101:1315.0 102:107.0 103:1040.0 104:45.0 105:19.0 107:8.0 109:435.0 110:6.0 111:104.0 113:36.0 115:74.0 116:861.0 117:1193.0 118:74.0 121:4.0 123:	14900	n/a		4127	1705	2522	2573	2728	1630	1806	1517	1821	2597	917	1455	1230	2322	3295	2424	1834	1013	5708	1597	1694	882	1904	2403	3791	3923	1259	1614	1897	1126	1879	1130	3971	3702	1529	2436	2903	1646	871	2437	1954	1459
220169	304229	174	220169	85:107.0 86:883.0 87:153.0 89:165.0 90:281.0 91:83.0 92:12.0 94:23.0 95:33.0 98:98.0 99:59.0 100:489.0 101:121.0 102:168.0 104:10.0 107:567.0 108:64.0 109:135.0 110:396.0 111:122.0 112:11.0 113:100.0 114:243.0 116:3118.0 117:926.0 118:243.0 120:71.0 121:5				17608	17201	21942	23579	22495	19981	22063	24299	19023	22918	21471	17049	18878	17943	12580	18544	8836	18825	20361	14674	18219	19380	19504	21246	14038	18053	19298	15565	17042	11935	15773	18454	17679	12395	21137	20324	19691	15934	14883	22012	21573	20087
239873	732710	391	239873	87:162.0 88:87.0 91:7.0 93:117.0 94:136.0 95:64.0 97:82.0 98:501.0 99:130.0 100:935.0 101:149.0 102:97.0 108:82.0 109:264.0 110:198.0 111:198.0 113:32.0 115:325.0 117:799.0 118:32.0 119:37.0 124:9.0 126:148.0 128:74.0 129:256.0 131:1207.0 132:339.0 133:23				779	1432	544	901	240	655	625	1085	1489	549	2450	430	2231	403	233	836	300	1538	1231	243	662	350	1682	1641	282	563	1332	352	212	281	462	1089	2202	404	239	586	1071	304	1146	1441	552	4394
lysine	663816	156	200530	85:70.0 86:263.0 87:37.0 88:156.0 89:59.0 90:9.0 91:501.0 92:1739.0 93:88.0 94:6.0 95:10.0 96:3.0 97:9.0 99:103.0 100:324.0 101:240.0 102:98.0 103:267.0 104:33.0 105:28.0 106:3.0 107:27.0 108:6.0 110:21.0 111:2.0 112:67.0 113:21.0 114:28.0 115:192.0 116:3	5962	C00047		158517	138098	200128	157829	154675	117322	192624	120696	180313	171896	151882	100846	141186	168326	87069	159014	52757	139198	173713	81868	141857	103743	113785	192127	145045	140322	183420	141982	177167	85506	163570	166453	118362	58206	138333	160979	133079	98501	124218	133676	166165	252939
223634	471218	140	223634	85:3523.0 86:4025.0 87:518.0 88:6746.0 89:576.0 90:660.0 92:41.0 93:163.0 94:1133.0 95:1326.0 96:4183.0 97:11291.0 98:11144.0 99:2506.0 100:979.0 101:382.0 104:150.0 106:31.0 107:494.0 108:284.0 109:175.0 110:2067.0 111:632.0 112:1232.0 113:862.0 114:1316				18111	15555	19684	21879	24067	19474	24776	26685	21982	22677	33936	21173	14178	11295	17368	21394	14071	1934	24483	21168	17825	23840	26913	33732	20325	22522	21637	20012	14431	16137	19012	15516	19893	17019	18929	12216	22585	17345	16269	27215	19574	27668
204344	246354	147	204344	86:308.0 87:101.0 88:30.0 89:47.0 90:3.0 91:6.0 92:4.0 94:7.0 99:46.0 100:172.0 101:45.0 102:40.0 103:28.0 105:5.0 108:4.0 110:8.0 113:22.0 114:3.0 115:74.0 117:193.0 118:2.0 119:41.0 125:24.0 128:183.0 129:12.0 130:40.0 131:202.0 132:62.0 133:110.0 134:1				337655	595404	502711	535633	554056	474051	386557	704869	558496	387318	545435	449791	485441	449947	417155	417754	385708	677557	475619	378337	416287	422331	593687	695183	339274	402479	578832	500433	525080	342205	356777	476421	467774	453284	431019	495388	616577	545647	388621	479950	478925	646288
239593	614313	269	239593	85:6500.0 86:21.0 96:73.0 97:3466.0 98:1467.0 99:1661.0 106:6.0 107:414.0 108:1.0 110:2293.0 111:328.0 112:118.0 113:1538.0 122:143.0 124:944.0 127:886.0 128:258.0 130:741.0 131:135.0 136:98.0 138:31.0 140:222.0 141:109.0 149:14.0 153:22.0 154:152.0 155:3				1685	2156	2758	2892	1513	1761	1097	4032	1425	1837	2973	2295	4886	3063	1397	1838	1411	2093	1596	1270	1998	1740	2420	2453	1265	917	2118	1789	1252	1433	1252	4083	1559	1647	1589	4851	1994	1341	2485	2028	2419	4540
223578	397473	272	223578	85:14.0 86:165.0 91:34.0 92:8.0 96:151.0 100:85.0 101:242.0 102:522.0 103:472.0 105:48.0 106:157.0 107:246.0 109:15.0 110:1584.0 114:55.0 116:133.0 118:333.0 122:10.0 124:17.0 126:16.0 129:237.0 132:192.0 134:538.0 135:13.0 137:8.0 138:10.0 139:59.0 140:1				967	1797	816	1066	631	890	596	2081	1224	463	2080	594	1041	823	373	578	366	1685	1232	533	872	581	2864	1807	343	496	1536	608	419	489	712	1166	1586	643	608	883	1230	479	925	1243	559	2799
281249	692691	261	281249	85:56.0 86:57.0 88:5.0 89:413.0 90:59.0 91:58.0 93:1.0 94:27.0 95:44.0 96:11.0 98:81.0 99:335.0 100:821.0 101:96.0 102:1455.0 103:77.0 104:252.0 106:6.0 107:88.0 110:92.0 111:54.0 112:20.0 113:302.0 116:198.0 117:167.0 119:1.0 121:4.0 122:18.0 124:25.0 12				1391	1769	1149	1476	437	1435	1000	1481	1688	1174	2594	494	2222	538	495	1246	384	2069	1096	454	1153	742	2330	1770	400	1247	1959	703	362	406	666	1559	1499	368	620	762	1709	581	1058	1679	717	4365
213733	597844	271	213733	85:1048.0 86:241.0 87:194.0 88:98.0 89:3695.0 90:352.0 91:92.0 92:2.0 95:98.0 96:30.0 97:2321.0 98:157.0 99:438.0 101:3686.0 102:538.0 103:4688.0 104:597.0 110:1.0 111:828.0 112:31.0 113:1061.0 114:153.0 115:185.0 116:346.0 117:1230.0 118:172.0 119:45.0 1				2433	3436	2330	2697	2684	1409	2139	2807	2712	1960	1556	2563	2097	3220	1687	2463	1746	2696	2706	1313	1850	2443	2217	2085	1824	2807	3917	1594	2288	1367	2812	1690	4721	2051	2643	3736	2465	2454	2413	3876	1788	2734
226842	544485	171	226842	85:115.0 86:250.0 87:101.0 88:258.0 91:47.0 93:1.0 95:10.0 96:25.0 97:268.0 98:27.0 99:156.0 100:627.0 101:836.0 102:379.0 107:476.0 108:6.0 109:22.0 111:143.0 113:39.0 114:41.0 115:2.0 116:507.0 117:2089.0 118:188.0 122:2.0 123:1.0 125:82.0 128:95.0 129:				40028	79212	24740	42420	8156	34734	19541	59811	73903	19320	95903	11538	70361	18427	6650	38417	2445	73370	59998	10074	31896	18008	82535	64172	9015	29664	78733	16417	9588	4126	22062	40563	93297	3143	15637	21903	56092	6238	46241	69447	17970	163934
224808	458884	181	224808	88:62.0 89:599.0 90:166.0 91:37.0 93:96.0 94:363.0 96:261.0 98:74.0 100:472.0 103:7.0 107:1177.0 108:222.0 110:1607.0 111:30.0 115:6.0 118:108.0 119:1.0 120:52.0 122:253.0 123:669.0 124:107.0 125:27.0 127:1183.0 130:147.0 131:4.0 133:10.0 134:854.0 135:41				6332	8571	6965	7673	5646	7833	5267	11039	6531	5463	9583	5327	8389	4553	3903	5795	3168	8740	7565	3924	6668	5114	9993	9815	4143	4584	9510	5419	4828	3453	5685	8134	7926	4285	5204	7638	8434	4090	4806	7971	6050	11140
226846	442001	258	226846	85:516.0 86:4985.0 87:1913.0 88:297.0 92:159.0 93:106.0 94:14.0 95:203.0 96:170.0 98:803.0 99:986.0 100:14054.0 101:2504.0 102:2719.0 103:1008.0 104:16.0 105:244.0 107:642.0 109:131.0 110:529.0 111:26.0 112:195.0 113:879.0 114:3258.0 115:2435.0 116:1107.0				7982	9203	4005	6166	1407	9858	2966	10069	4481	3537	11040	3421	7986	2652	1554	4789	1407	8651	10893	3772	4472	2300	11672	12324	2794	4371	12073	3494	1647	1441	2683	7614	7524	1414	1806	5557	9423	1343	5463	9665	2489	14987
227391	527630	170	227391	88:900.0 89:492.0 90:136.0 92:94.0 94:51.0 95:24.0 98:4635.0 99:934.0 100:135.0 101:64.0 102:368.0 109:217.0 110:2130.0 111:170.0 112:302.0 113:497.0 114:363.0 118:173.0 122:92.0 124:419.0 127:340.0 128:53.0 129:2227.0 131:154.0 132:34.0 134:2215.0 138:7.				2560	2335	1644	1774	1135	1541	1392	2301	2105	1461	3468	996	2142	1250	1141	1657	972	2585	1784	453	1110	926	2733	3146	1280	1158	3337	1072	1088	958	1653	1591	2169	1172	908	2009	1670	959	1722	2018	711	3583
alpha ketoglutaric acid	507734	198	200425	85:391.0 86:157.0 87:197.0 88:83.0 89:3128.0 90:249.0 91:359.0 92:18.0 93:33.0 94:2.0 95:43.0 96:9.0 97:842.0 98:144.0 99:219.0 100:122.0 101:471.0 102:91.0 103:908.0 104:48.0 105:69.0 108:3.0 109:9.0 110:31.0 111:395.0 112:805.0 113:115.0 114:22.0 115:30	51	C00026		1557	1268	1523	1499	1850	645	5410	1164	1542	967	1321	1111	995	1320	1206	1051	1306	832	1137	1700	972	1796	1046	1028	1815	2464	1319	1796	1286	796	1183	769	2976	1255	1876	699	1095	802	1295	1283	404	1711
224571	371691	140	224571	85:620.0 87:235.0 89:268.0 90:360.0 91:494.0 92:256.0 93:604.0 94:979.0 95:1184.0 96:2507.0 97:3367.0 98:16998.0 99:1219.0 100:1139.0 101:402.0 102:808.0 103:1254.0 104:1022.0 105:168.0 106:88.0 107:3865.0 108:630.0 109:1094.0 110:1993.0 111:214.0 112:693				19702	38661	21773	25242	16486	23926	16791	47492	32320	16947	46350	15062	30849	18206	12988	19584	11745	39208	34934	12459	22502	15607	48507	41469	13200	14871	41461	13969	14333	11804	20238	25390	37274	15046	16643	23323	33720	14101	24066	37714	18492	59221
glycerol-beta-phosphate	574994	211	212582	85:68.0 87:44.0 89:117.0 91:9.0 93:8.0 97:35.0 99:59.0 101:1364.0 102:25.0 103:797.0 104:86.0 105:83.0 107:27.0 109:100.0 111:9.0 115:165.0 116:474.0 119:53.0 121:51.0 123:86.0 129:1400.0 130:380.0 131:332.0 132:57.0 133:843.0 134:260.0 135:310.0 136:4.0	2526	C02979		501	480	579	690	734	871	574	827	577	853	712	808	802	801	393	572	584	603	743	705	705	804	510	873	687	574	648	586	573	765	386	1176	1247	1020	1142	730	519	733	428	549	1409	1022
200427	452933	154	200427	85:232.0 86:2955.0 87:378.0 88:140.0 89:687.0 90:98.0 91:11.0 95:22.0 97:17.0 98:160.0 99:103.0 100:1583.0 101:244.0 102:835.0 103:47.0 104:21.0 110:5.0 111:6.0 112:142.0 113:141.0 114:640.0 115:105.0 116:196.0 117:125.0 118:19.0 124:5.0 125:1.0 126:95.0				39953	41463	52575	50482	54107	46799	35229	53567	35033	42040	40429	29141	42183	33493	19625	38232	11804	45595	42960	22999	41213	31448	38232	52281	23505	30174	45248	28180	39465	18590	42064	43401	39239	17318	34766	50773	43255	26267	33918	46342	43160	47874
229962	951858	397	229962	85:1893.0 86:301.0 87:8423.0 88:337.0 89:2092.0 90:158.0 91:1274.0 92:388.0 93:2409.0 94:387.0 95:5733.0 96:1170.0 97:4577.0 98:2628.0 99:1466.0 100:346.0 101:7236.0 102:855.0 103:14468.0 104:1755.0 105:1225.0 106:196.0 107:2087.0 108:348.0 109:2644.0 110				2160	108	209	202	169	236	192	218	467	185	128	374	332	833	382	527	323	96	4156	184	825	334	348	439	1321	250	215	162	255	329	749	78	990	1700	595	657	258	292	295	130	196	226
215504	512079	373	215504	85:35.0 86:68.0 87:37.0 89:227.0 90:13.0 92:3.0 93:11.0 94:2.0 97:11.0 98:44.0 99:20.0 101:134.0 103:449.0 104:22.0 105:18.0 107:7.0 108:22.0 110:241.0 111:1.0 114:6.0 115:26.0 116:168.0 121:18.0 122:7.0 127:29.0 128:29.0 129:74.0 131:51.0 132:18.0 133:35				912	2049	776	1028	321	755	808	3007	2344	604	3121	360	2225	1181	201	867	203	2106	2207	271	1083	767	3915	1571	264	631	2997	517	296	197	993	1126	2967	237	877	868	1516	206	1241	2733	1055	4464
217842	447001	265	217842	87:414.0 88:164.0 89:119.0 90:14.0 92:10.0 93:21.0 95:18.0 98:10740.0 99:868.0 101:183.0 102:89.0 103:1437.0 104:136.0 105:364.0 106:62.0 109:4.0 110:236.0 111:14.0 112:31.0 114:890.0 115:610.0 116:30.0 117:924.0 118:124.0 119:346.0 120:9.0 124:174.0 126:				9553	23225	6445	13059	3429	12116	6667	23074	21446	6630	37715	4984	18671	5334	3445	10729	2852	22683	19621	4263	10755	5891	20165	26019	3642	7418	21023	4479	3287	3009	5840	12126	21844	3394	5676	6434	18701	4020	12528	21336	7202	46424
281172	589910	140	281172	85:202.0 86:69.0 88:159.0 90:565.0 94:161.0 97:189.0 98:331.0 100:49.0 101:272.0 102:206.0 103:2963.0 104:276.0 107:227.0 108:50.0 110:458.0 112:373.0 113:197.0 114:81.0 116:1529.0 117:61.0 118:12.0 121:53.0 124:70.0 126:24.0 127:354.0 129:34.0 130:21.0 1				7646	13090	5740	9017	2122	7455	4821	10942	13419	4227	16068	3185	11824	4372	1772	7553	1567	13347	11271	2714	6215	3779	18562	11837	2454	6321	13901	4427	2301	1571	5070	8107	15968	1203	3636	4655	10424	1851	9120	12142	4521	27124
224529	549948	275	224529	86:695.0 89:625.0 91:1737.0 92:304.0 93:1110.0 94:2441.0 95:393.0 98:1354.0 100:64.0 102:75.0 104:584.0 105:1.0 106:1059.0 107:1034.0 108:914.0 109:22.0 110:6961.0 111:394.0 112:199.0 113:101.0 114:293.0 116:142.0 117:183.0 118:1328.0 119:442.0 120:873.0				1711	2699	1866	2140	1667	2051	2827	3297	2203	1662	3441	1711	2283	1924	1067	1914	2039	2774	2376	1735	1714	1362	3352	3697	1568	1552	3016	1480	1411	1716	1898	2022	2428	1610	1820	2024	2473	1508	1550	2397	1865	3905
281106	485548	232	281106	85:2729.0 86:8458.0 88:1582.0 89:2478.0 90:119.0 91:50.0 95:472.0 96:27.0 98:2810.0 99:1522.0 100:7421.0 101:3495.0 102:1380.0 103:2595.0 104:189.0 105:954.0 106:340.0 107:588.0 108:119.0 109:19.0 111:205.0 112:1331.0 113:1962.0 114:3132.0 115:3479.0 116:				47717	34498	82266	45770	91737	50238	93451	62180	59209	63676	42097	116643	77375	88061	115359	58583	54929	29457	79656	53278	56558	66164	41950	24545	127498	76635	69834	117760	114314	66588	61019	58629	61268	82990	46060	62822	33714	89922	51388	55975	58512	107262
239995	655244	287	239995	85:1027.0 86:731.0 87:422.0 88:657.0 89:4885.0 90:433.0 91:274.0 92:115.0 93:362.0 94:91.0 95:400.0 96:98.0 97:2007.0 98:7462.0 99:1475.0 100:1565.0 101:2832.0 102:528.0 103:5136.0 104:628.0 105:846.0 106:81.0 107:694.0 108:72.0 109:103.0 110:1111.0 111:3				1621	2901	926	1804	536	1621	882	2312	2704	827	2668	645	1555	811	424	1461	263	2821	2466	677	1281	899	3614	2127	569	1289	2948	883	521	400	1015	1189	2776	346	909	649	2361	397	1408	2818	701	4298
281122	234713	105	281122	85:21624.0 86:706.0 88:27.0 89:2133.0 90:428.0 91:10614.0 92:2858.0 93:507.0 94:351.0 95:1250.0 96:552.0 97:3608.0 98:11882.0 99:1550.0 102:878.0 103:6501.0 104:3297.0 105:94139.0 106:8607.0 107:749.0 108:70.0 109:6490.0 110:1967.0 111:20.0 113:8484.0 115				63781	64889	99590	102025	77466	73009	109392	110244	83159	107276	90416	110924	85577	84048	92406	80876	95200	68537	88467	96502	80298	108634	80513	91892	84676	96287	80191	76586	50993	84182	51054	76815	68952	110633	110378	69113	80709	108349	89311	90562	96504	62973
222058	477647	366	222058	85:233.0 86:174.0 89:557.0 90:285.0 92:244.0 93:204.0 94:1642.0 95:1291.0 96:1586.0 97:126.0 99:343.0 100:42.0 101:464.0 102:159.0 103:1054.0 105:64.0 108:1205.0 109:865.0 110:10763.0 111:519.0 112:362.0 114:221.0 115:11.0 116:450.0 117:811.0 118:325.0 11				3171	5604	3542	4452	2497	3212	2565	7892	4103	2894	7728	2997	7969	3316	2233	3333	1962	5068	3992	1955	3385	2308	8673	6938	2140	2153	6431	2648	2079	1886	2901	6120	5826	2367	2372	5259	4753	2153	3812	4159	2967	11370
219021	335520	228	219021	85:79.0 86:747.0 87:481.0 88:1478.0 89:535.0 90:80.0 91:1250.0 92:199.0 93:150.0 96:33.0 97:568.0 99:59.0 100:147.0 102:341.0 103:2026.0 104:444.0 105:491.0 106:61.0 107:301.0 108:726.0 109:97.0 110:17975.0 111:666.0 112:26.0 113:79.0 114:274.0 115:714.0				863621	1227522	518941	894656	191868	701236	530780	1039910	1439877	484619	1618677	284411	1326128	393348	156831	810348	83491	1332481	1072832	272878	606016	338352	1714105	1062146	236574	706943	1276459	403964	202840	114557	459602	770542	1526977	103616	378596	392086	1044014	182101	957845	1253410	436968	2354026
226927	824957	445	226927	85:195.0 86:9.0 87:791.0 94:90.0 95:2.0 96:1.0 97:29.0 99:35.0 101:354.0 103:363.0 104:40.0 111:64.0 112:90.0 114:3.0 116:176.0 130:109.0 131:35.0 132:22.0 137:37.0 140:120.0 141:25.0 143:188.0 144:444.0 147:429.0 148:19.0 152:20.0 154:112.0 155:34.0 156:				3392	752	4274	5187	3467	4510	6841	3046	429	8626	2179	5604	7754	1491	5018	1939	1978	2793	2261	5028	3199	2162	925	1771	6177	2369	1309	6269	1182	3425	1586	7533	4907	3573	918	8426	1713	5005	1510	1064	9228	2742
240265	672366	139	240265	87:3622.0 88:477.0 94:234.0 95:520.0 97:402.0 98:383.0 100:970.0 108:130.0 110:443.0 111:1137.0 112:541.0 114:321.0 117:476.0 122:62.0 123:32.0 124:75.0 127:5.0 134:3402.0 136:264.0 138:272.0 139:8576.0 140:729.0 142:9.0 143:879.0 144:24.0 147:5521.0 148:				2847	7229	2916	3617	1322	3199	3154	7532	5579	3027	10756	970	13892	1809	923	2833	946	7403	4922	1216	3682	1900	12119	6149	954	2618	6807	1827	3751	2331	2046	7127	12319	1856	2071	3197	5203	1069	6928	6021	4101	20109
226843	551430	171	226843	85:877.0 86:3059.0 87:654.0 88:213.0 90:82.0 91:329.0 93:122.0 95:231.0 97:381.0 98:2157.0 99:2085.0 100:5946.0 101:2099.0 102:6936.0 103:1290.0 104:476.0 106:29.0 107:863.0 108:109.0 109:684.0 110:422.0 111:89.0 112:657.0 113:243.0 114:492.0 115:914.0 11				34661	43941	18522	32580	6317	27067	15509	29998	51528	15816	57801	8234	44081	9408	4037	29619	2337	49568	32134	7912	21063	12035	57600	33294	7257	24290	50154	12992	5999	3194	14889	26557	36469	2832	9311	13763	36526	5682	26687	39885	6056	95738
227345	395995	186	227345	85:3270.0 86:3696.0 87:268.0 88:577.0 89:2752.0 91:762.0 94:168.0 98:6951.0 100:3277.0 101:2430.0 102:12091.0 103:3838.0 104:265.0 108:338.0 109:319.0 110:310.0 111:223.0 112:495.0 113:52.0 114:2019.0 115:213.0 116:2146.0 117:697.0 118:758.0 119:511.0 126				12207	24551	9317	14214	6842	17200	7325	16101	17793	7103	28436	6493	16684	6754	4978	12818	3480	25197	18491	6109	11698	7470	10823	22387	5265	8795	23422	5781	6905	3918	10111	13215	19688	4616	7270	8247	21369	5398	11323	20748	9452	36988
226841	759286	232	226841	85:87.0 86:2474.0 87:458.0 88:808.0 89:484.0 94:75.0 95:202.0 96:170.0 97:2294.0 98:293.0 99:151.0 100:1861.0 101:1638.0 102:438.0 103:6923.0 104:378.0 105:334.0 106:90.0 111:401.0 112:34.0 114:864.0 115:723.0 116:3651.0 117:2324.0 118:310.0 119:138.0 123				25962	17489	26383	16084	27407	13034	25419	12855	21395	18271	20430	29719	18857	4996	19054	17631	27450	19592	18665	26478	14499	6829	30726	22575	38945	25959	25673	28786	19496	14854	17875	14412	28112	15946	12880	13134	17865	18410	8623	15750	16096	33914
281166	934476	290	281166	89:5193.0 90:420.0 93:66.0 94:56.0 96:64.0 97:163.0 98:68.0 102:50.0 103:1479.0 104:37.0 108:24.0 114:113.0 116:208.0 117:217.0 135:72.0 142:20.0 144:369.0 158:207.0 161:936.0 162:40.0 163:667.0 164:48.0 165:14.0 172:126.0 173:11.0 174:14.0 176:46.0 177:7				1484	4442	1370	1912	543	1923	608	4307	3545	715	7938	295	3048	1352	312	1023	229	4409	3441	253	931	589	4175	5717	347	623	4273	444	522	189	1642	2873	3957	283	561	1590	3608	272	1395	3784	492	7497
222169	975088	144	222169	85:126.0 86:76.0 89:207.0 90:315.0 91:646.0 93:130.0 94:191.0 95:382.0 97:395.0 98:1885.0 99:66.0 100:141.0 101:97.0 108:218.0 111:44.0 112:111.0 113:1.0 115:1182.0 116:5333.0 117:456.0 118:104.0 120:99.0 121:117.0 122:334.0 124:78.0 125:530.0 127:293.0 1				19521	12509	6440	6203	6416	11404	6448	4075	9107	4059	8938	3816	7381	37162	16568	3141	6537	38314	15096	14159	18193	9297	16974	2678	5429	33382	14345	2601	24695	8019	9675	15291	29956	22322	12184	12315	11973	7278	38306	52968	13930	15407
223500	516216	269	223500	86:60.0 94:212.0 95:417.0 98:208.0 100:132.0 103:1.0 107:47.0 110:637.0 116:11.0 117:8.0 122:4.0 123:5.0 124:47.0 126:8.0 127:114.0 128:166.0 129:13.0 130:285.0 134:76.0 136:70.0 137:5.0 138:317.0 144:48.0 147:8.0 149:1.0 150:70.0 165:173.0 166:37.0 170:6				7498	8792	6381	9568	3679	7984	4987	10166	9013	5157	12685	3351	10920	4302	2258	6982	1754	9774	9128	2866	6705	4742	11909	9968	2799	5250	10268	3916	2965	1768	4016	7703	10831	1917	4083	5465	9371	2221	6460	9587	5353	16959
199773	755246	215	199773	85:1040.0 86:1525.0 87:495.0 88:1118.0 89:601.0 90:119.0 91:29.0 92:36.0 93:248.0 94:64.0 95:649.0 96:581.0 97:10553.0 98:3677.0 99:531.0 100:1134.0 101:1172.0 102:728.0 103:3148.0 104:469.0 105:156.0 106:16.0 107:108.0 108:59.0 109:327.0 110:64.0 111:128				60239	55356	135960	61445	141055	77944	113282	135452	108315	82836	60628	110545	161735	76869	231585	78252	57549	48240	104943	64989	75323	120142	75892	30429	270753	131875	119170	181781	111254	98587	106063	91734	184145	103752	93454	82112	49594	129663	127724	93696	88595	203837
226844	641635	301	226844	85:346.0 86:3016.0 87:190.0 88:559.0 89:1199.0 95:28.0 97:362.0 98:1027.0 99:621.0 100:5019.0 101:2427.0 102:859.0 103:1956.0 105:367.0 108:5.0 109:282.0 110:309.0 112:214.0 113:353.0 114:371.0 116:1317.0 117:2249.0 118:242.0 121:53.0 122:29.0 124:7.0 125				28355	44661	20175	30705	8546	26148	14007	35807	44840	14050	38290	14200	25228	13380	8370	28387	6186	43738	42442	13364	24163	16254	53046	25778	11050	26177	46566	17471	7980	6757	15855	19114	38824	6871	15172	11479	37524	9795	31107	46540	13592	63822
ethanolamine	342787	174	213251	85:984.0 86:37354.0 87:4267.0 88:3374.0 89:1377.0 90:181.0 97:11.0 98:234.0 99:721.0 100:37001.0 101:4773.0 102:3509.0 103:3054.0 104:472.0 105:595.0 113:1061.0 114:4332.0 115:1470.0 116:6103.0 117:3990.0 118:984.0 119:1392.0 120:133.0 121:48.0 126:6.0 12	700	C00189		383703	446341	546797	516263	509847	496566	345064	519821	412573	421986	438718	243087	444148	399102	156489	366649	89917	498800	501297	182894	439967	283908	430198	466103	186713	276559	500903	215578	384018	144831	434912	460900	384198	135543	333157	544143	493944	212292	373902	494571	432814	522188
224792	436689	155	224792	85:2092.0 87:4776.0 88:665.0 90:26.0 92:143.0 93:385.0 94:82.0 95:257.0 96:4191.0 97:2280.0 98:1710.0 99:30990.0 100:754.0 101:586.0 103:951.0 104:83.0 107:1228.0 109:228.0 110:2836.0 111:4945.0 112:1119.0 113:7748.0 114:1232.0 116:136.0 118:372.0 122:198				28912	46711	25577	34756	20357	27623	24357	48102	47319	25136	74534	18941	45832	16949	16286	29467	12394	43204	43420	17983	24971	21064	62286	53398	16222	24514	46416	20191	16258	14924	24929	33236	53098	17473	19857	26028	40085	15864	28590	44843	22623	87388
204425	448206	350	204425	85:573.0 86:3940.0 87:7186.0 88:951.0 89:667.0 90:38.0 92:21.0 93:23.0 95:39.0 96:8.0 97:23.0 98:24.0 99:129.0 100:2533.0 101:2540.0 102:845.0 103:1656.0 104:185.0 105:894.0 106:90.0 107:99.0 108:11.0 109:4.0 112:44.0 113:304.0 114:146.0 115:1075.0 116:45				10495	10764	14873	17697	10093	11011	5599	9656	9779	8122	12441	15768	12961	16011	11167	12280	10717	9438	8733	9415	10325	11769	12298	10422	10196	8795	11990	15722	9319	8601	9917	11930	4323	14691	10012	13145	10658	12653	10752	8646	11010	14487
200429	438443	174	200429	85:40.0 86:961.0 87:88.0 88:35.0 89:258.0 90:24.0 95:8.0 98:30.0 99:8.0 100:484.0 101:54.0 102:49.0 103:3.0 109:2.0 111:3.0 112:15.0 113:16.0 114:75.0 115:4.0 116:7.0 117:7.0 118:1.0 120:3.0 122:2.0 124:3.0 125:1.0 126:13.0 127:2.0 128:10.0 130:129.0 131:				29360	33667	41009	37878	38645	37230	24598	44575	28661	31002	32481	18696	31573	25918	12869	28249	6897	37312	35301	14213	31501	21778	30601	41459	14943	20579	36369	17961	28464	11581	33786	34318	31163	10905	24350	40392	34961	16265	25920	39571	31330	38295
281147	329324	106	281147	85:391.0 86:238.0 87:1115.0 88:271.0 90:208.0 91:1658.0 92:441.0 93:347.0 94:31.0 98:138.0 99:24713.0 100:13811.0 101:2828.0 102:434.0 104:5184.0 105:1612.0 106:20895.0 107:3440.0 108:54.0 111:1916.0 112:1217.0 113:605.0 114:3532.0 115:758.0 116:1008.0 11				11722	17737	11134	15239	8853	12809	10732	20245	16650	10466	25468	8835	17627	11277	7737	11231	6168	18374	16755	7087	11495	9674	20042	21186	7302	9296	19306	8147	8153	6486	10923	14249	18430	8184	9991	11574	17132	8090	16556	18778	10993	27219
oxalic acid	259625	147	207563	87:26.0 88:5.0 89:17.0 90:17.0 91:27.0 92:2.0 93:18.0 95:4.0 96:7.0 99:2.0 101:6.0 102:114.0 103:149.0 104:1.0 105:47.0 106:2.0 108:11.0 109:4.0 111:8.0 113:8.0 114:3.0 115:48.0 116:13.0 117:87.0 119:5.0 120:4.0 122:7.0 123:5.0 125:4.0 126:5.0 128:4.0 130	971	C00209		2378972	3312600	1748379	2471741	766511	2132060	1785556	2744028	3710379	1152413	3859089	927264	2994474	1210342	355822	2225267	403561	3560695	2742708	1028277	1877473	1294192	3346389	2544358	816292	2096778	3391977	1305177	607468	466164	1347893	2146024	2628972	422223	1320148	629837	3190636	631197	3084443	3053218	1528233	1461842
281189	226160	105	281189	85:19616.0 86:3409.0 87:9265.0 88:6530.0 89:16791.0 90:4403.0 91:280185.0 92:72839.0 93:15928.0 94:532.0 95:46.0 96:9311.0 99:580.0 101:4569.0 102:12004.0 103:56640.0 104:23989.0 105:285208.0 106:31702.0 107:14554.0 108:1292.0 109:2784.0 110:1941.0 112:81				207830	104734	334062	437933	343146	521859	705149	702747	260717	332991	288007	20754	250665	164256	274809	329931	276749	391353	317678	244851	249367	248660	307157	248233	251463	317993	236922	242416	80025	184960	283540	254878	125975	322311	339482	59105	266665	463062	263399	232202	61180	465021
241114	425547	238	241114	86:1101.0 87:13.0 88:555.0 89:1157.0 90:5.0 91:1.0 93:2.0 94:314.0 98:16122.0 99:939.0 100:1242.0 102:130.0 103:16.0 104:41.0 106:282.0 108:200.0 109:1.0 110:676.0 111:1794.0 112:351.0 114:412.0 116:36.0 117:1007.0 118:9.0 119:13.0 120:295.0 121:430.0 122				1576	1733	1582	1819	1846	1915	1653	1258	1854	1374	1841	1657	1283	1190	1323	1559	1310	1891	1830	1610	1430	1741	1333	1593	1339	1480	1592	2290	1403	764	2035	1174	1813	1462	1813	1390	1912	1115	1440	1937	2195	1750
215682	433076	174	215682	85:30.0 86:439.0 87:47.0 88:16.0 89:69.0 93:17.0 95:17.0 96:5.0 97:24.0 98:27.0 99:2.0 100:278.0 101:12.0 102:156.0 103:25.0 104:5.0 106:1.0 107:4.0 109:1.0 112:1.0 113:30.0 114:9.0 115:4.0 116:19.0 117:5.0 122:3.0 126:11.0 128:11.0 130:82.0 131:2.0 140:1				30896	34838	41160	39751	41191	38033	26663	44473	29384	31162	32258	20377	32404	28889	14111	29213	8033	37330	35933	16527	33671	23438	30535	42452	14952	22046	36327	19749	30688	12845	34524	35279	32282	12262	25688	41632	35627	18840	26710	39295	33971	40288
239852	712000	373	239852	86:413.0 88:7.0 92:2.0 98:347.0 99:181.0 100:368.0 101:2.0 102:70.0 109:32.0 113:19.0 114:58.0 118:36.0 123:12.0 124:45.0 128:153.0 129:22.0 130:1.0 132:156.0 136:8.0 139:24.0 140:75.0 141:91.0 142:207.0 144:7.0 148:76.0 151:95.0 152:1.0 153:107.0 154:14.				2304	3472	1345	2457	615	1565	971	1301	3690	834	1474	1213	773	1363	644	2353	490	2893	3811	1134	1473	1377	2101	525	1190	1892	2529	1536	869	394	1876	454	2839	398	1204	448	2411	438	1934	3063	857	1921
conduritol-beta-epoxide	704220	318	208840	85:837.0 86:241.0 87:1067.0 88:393.0 89:783.0 90:67.0 91:508.0 92:185.0 93:255.0 94:127.0 95:352.0 96:333.0 97:498.0 98:274.0 99:1092.0 100:167.0 101:2528.0 102:825.0 103:13982.0 104:1459.0 105:1031.0 106:159.0 107:209.0 108:86.0 109:357.0 110:109.0 111:1	119054	n/a		241	378	775	467	939	441	1717	957	698	1942	1638	574	477	2962	589	2313	1171	2025	3742	3507	6301	742	300	560	998	2525	1253	3332	1376	1401	1066	1473	1586	3751	750	2200	2402	4291	1038	1262	4696	4393
221431	427636	174	221431	85:270.0 86:2571.0 87:475.0 88:320.0 89:276.0 90:144.0 92:88.0 93:36.0 96:34.0 97:65.0 98:166.0 99:73.0 100:1535.0 101:258.0 102:187.0 103:98.0 104:233.0 105:166.0 110:707.0 111:35.0 112:148.0 113:320.0 114:1.0 115:79.0 116:234.0 117:1366.0 118:364.0 119:				14378	16346	19977	18691	18967	18315	12675	21025	14114	14897	15959	8907	16335	13142	6171	13914	3667	17941	17890	7192	15669	10805	15841	20724	7661	9914	17809	9281	13973	5813	16497	17124	15777	5704	12346	19318	17371	8524	13210	18658	15908	19120
234491	489261	226	234491	85:542.0 94:100.0 96:330.0 97:136.0 100:605.0 101:725.0 102:1297.0 104:4.0 106:66.0 107:401.0 108:692.0 109:205.0 110:378.0 113:431.0 114:278.0 116:91.0 122:149.0 123:48.0 124:369.0 126:3.0 127:897.0 129:641.0 130:2716.0 132:806.0 134:1565.0 136:1086.0 13				3930	7327	3241	4576	1370	4485	2805	8061	6344	2624	8938	1341	6214	1888	824	3852	418	7127	6051	1251	4310	1733	11067	6570	843	2882	7775	1747	1048	567	2034	4368	8420	618	2173	2314	5921	1078	4244	7542	2874	13530
281150	388815	112	281150	86:60.0 87:511.0 88:80.0 92:15.0 93:22.0 94:56.0 95:17.0 96:7.0 98:269.0 100:53.0 102:734.0 103:11.0 104:18.0 109:6.0 110:53.0 111:11.0 112:6544.0 113:1008.0 114:959.0 115:94.0 116:1174.0 124:39.0 126:130.0 127:46.0 129:243.0 130:485.0 131:2508.0 132:970.				2985	5852	1973	3895	1649	3057	2037	5994	5445	2271	9239	1392	4763	2461	1313	2649	1176	6068	4849	1451	2656	2024	8349	6794	1391	1772	5534	1668	1071	1131	2479	3452	6730	1312	1531	2577	4744	1359	3413	5562	2061	11361
281148	783627	331	281148	85:510.0 86:913.0 87:51.0 88:1.0 89:86.0 92:17.0 95:1010.0 96:885.0 97:729.0 98:688.0 99:485.0 100:570.0 101:375.0 102:5.0 104:2.0 105:12.0 106:6.0 109:284.0 111:118.0 112:115.0 113:491.0 114:65.0 116:861.0 117:3831.0 119:217.0 122:5.0 123:271.0 124:277.0				1852	3124	1546	2087	862	1368	1451	2254	1777	1825	3403	408	3254	962	424	1159	466	3082	2293	654	1923	1371	4059	2024	589	1253	1713	1067	358	526	1099	2368	3900	505	945	1111	2393	724	2571	2816	1419	5617
217867	400245	154	217867	85:710.0 87:127.0 88:336.0 89:83.0 90:34.0 92:277.0 94:357.0 95:294.0 96:415.0 97:291.0 98:180.0 99:291.0 100:606.0 101:54.0 103:463.0 104:11.0 106:39.0 108:159.0 110:9082.0 111:399.0 112:279.0 113:239.0 114:621.0 115:5775.0 116:1198.0 117:799.0 118:190.0				14414	23766	12506	18661	8846	16263	11553	25650	23151	10896	33935	8818	22406	11724	6042	14199	5100	23693	21887	7250	13955	9765	32667	26008	7148	11268	24499	9181	7738	5512	10877	17167	25315	6396	9656	12272	21474	7157	17906	23329	11809	41380
223708	354552	273	223708	85:49.0 86:1863.0 87:1824.0 88:2092.0 89:443.0 90:11.0 93:193.0 94:385.0 95:25.0 96:4917.0 97:430.0 98:2723.0 99:260.0 100:3757.0 101:844.0 103:2113.0 104:630.0 105:196.0 106:74.0 108:115.0 109:109.0 110:1855.0 111:678.0 112:873.0 113:712.0 114:4155.0 115				8025	13764	13437	9817	13643	11111	6279	15148	6658	5201	11375	7434	13149	11690	6202	5198	5805	11425	10651	4049	6975	5732	5977	15087	6787	3695	12701	9296	14007	4639	17809	12719	10279	6893	6628	21257	10269	4765	6648	9674	7439	11274
223938	492335	184	223938	85:224.0 86:68.0 87:1529.0 88:171.0 90:35.0 94:301.0 100:41.0 101:34.0 109:48.0 110:1413.0 112:29.0 113:37.0 114:5282.0 115:939.0 116:43.0 124:18.0 130:77.0 134:273.0 135:86.0 136:201.0 138:78.0 139:6.0 143:2145.0 144:259.0 145:48.0 147:303.0 153:83.0 156				9600	19348	9643	12850	6921	11509	6954	22001	16947	7535	28765	6263	16736	7523	5585	10086	5298	19179	16986	5140	10315	7286	17637	23452	5883	6434	20589	5994	6677	4682	8979	12612	19599	6270	6611	9838	17688	5498	10876	18248	8919	34792
213526	284610	201	213526	85:61.0 88:8.0 97:21.0 98:76.0 99:90.0 100:18.0 107:1.0 108:1.0 109:132.0 110:3.0 115:1.0 117:329.0 128:4.0 129:983.0 130:31.0 133:2.0 142:3.0 143:59.0 144:79.0 145:304.0 146:6.0 152:5.0 157:237.0 158:3.0 159:113.0 160:565.0 161:49.0 162:3.0 167:1.0 171:1				10131	10521	13494	15169	13554	14660	21029	18143	11441	23262	11944	18821	15709	14520	18182	15653	16139	14625	15784	16563	14934	14266	14321	16231	16348	13714	13851	15911	14413	15551	13252	16486	26029	24723	18259	19544	14121	20888	12016	11348	21821	11087
226858	356536	241	226858	85:929.0 86:565.0 88:7803.0 89:24.0 90:265.0 91:162.0 93:726.0 94:383.0 95:559.0 97:603.0 98:1780.0 99:4460.0 100:555.0 101:737.0 102:690.0 104:908.0 106:6.0 108:27.0 109:292.0 110:857.0 111:465.0 112:527.0 113:2786.0 114:1303.0 115:892.0 119:44.0 120:28.				5379	6764	2308	5294	982	3115	2572	3485	8707	2236	4142	2182	4777	2018	953	4828	903	6789	7397	2260	2877	2315	6833	2495	1785	4036	6306	2938	1129	885	2947	2832	8885	872	1748	1420	5282	1056	4609	7465	2123	10066
227366	283401	159	227366	85:1516.0 86:26579.0 87:79.0 88:3168.0 89:25976.0 90:5434.0 91:5582.0 92:515.0 93:1269.0 94:1507.0 95:2167.0 96:3837.0 97:1396.0 98:14431.0 99:1732.0 103:7355.0 105:1391.0 106:238.0 107:5783.0 108:1725.0 109:1063.0 110:4010.0 111:435.0 112:9585.0 113:958.				8338	16186	6876	10048	6223	9846	5223	15354	14058	6088	19707	5690	10210	4139	4874	7738	3667	13254	14091	3107	6776	4490	16633	14518	5264	5383	13311	5945	5916	4192	7778	6596	11475	5378	6078	11155	12965	5284	9400	14871	5555	21791
succinic acid	370518	247	199210	85:668.0 86:529.0 87:317.0 88:94.0 89:164.0 90:25.0 91:33.0 92:73.0 93:121.0 94:10.0 95:40.0 96:19.0 97:39.0 98:6.0 99:154.0 100:48.0 101:331.0 102:52.0 103:140.0 104:19.0 105:108.0 106:28.0 107:63.0 108:6.0 109:1.0 110:18.0 111:15.0 112:12.0 113:291.0 11	1110	C00042		3619	6086	3356	2137	3306	5010	3596	5252	5992	2732	8958	3406	2941	3364	3209	4867	2331	5705	3164	3394	5299	4944	3975	9350	2373	3318	8609	2687	4267	2494	3900	2691	8557	2672	4551	4175	5690	5062	1765	3994	5116	11984
215355	338105	188	215355	85:19.0 86:21.0 88:8.0 90:40.0 91:76.0 93:46.0 94:6.0 96:20.0 100:2585.0 101:226.0 102:62.0 105:28.0 107:27.0 108:1.0 109:4.0 111:40.0 113:71.0 114:539.0 115:135.0 116:4.0 119:81.0 121:1.0 122:31.0 125:3.0 126:7.0 127:22.0 129:83.0 130:349.0 131:91.0 132:				18245	34172	15447	22236	10449	20571	15199	35529	32657	14563	49690	10699	29013	12750	8236	18751	6591	35430	32813	9318	18429	11906	30400	37176	8879	15573	34560	10039	10544	7053	16113	21762	34661	8694	13451	16691	30348	8944	19292	35522	17714	57024
221562	273779	98	221562	85:990.0 86:537.0 88:502.0 89:593.0 91:120.0 92:14.0 94:78.0 95:123.0 96:268.0 97:92.0 98:17806.0 99:1345.0 100:2596.0 102:194.0 103:283.0 104:314.0 105:19.0 107:310.0 109:37.0 110:274.0 111:55.0 112:27.0 114:473.0 115:94.0 116:49.0 117:744.0 118:324.0 11				337989	381150	190745	306006	175324	315909	144156	247285	287303	161491	383726	164598	372179	225303	130555	252545	83158	388803	291451	118259	210585	142114	375048	358624	153245	162058	395901	225962	154210	102881	267232	368156	289715	127837	124953	299222	382928	143426	279008	302131	167984	613354
228309	595001	156	228309	86:2079.0 88:1534.0 89:375.0 90:208.0 91:1306.0 92:16.0 93:306.0 94:783.0 95:298.0 96:2415.0 97:535.0 98:2660.0 99:211.0 100:605.0 102:43.0 105:116.0 106:134.0 107:502.0 108:630.0 110:194.0 111:22.0 112:468.0 113:292.0 114:5226.0 115:421.0 121:25.0 122:91				8886	5232	1658	9211	1476	1612	8965	1731	1017	1897	6192	8711	6185	6197	9182	7945	6513	6860	2151	8878	1298	9701	5052	6894	10474	1291	2004	9856	7725	7630	902	6145	4710	8683	1423	6881	6356	9818	5964	9642	7166	1946
226903	833661	313	226903	85:109.0 87:2.0 89:71.0 91:18.0 93:286.0 94:265.0 95:188.0 96:352.0 97:60.0 99:41.0 103:336.0 108:10.0 110:514.0 111:11.0 112:1.0 114:41.0 116:278.0 117:751.0 118:167.0 121:118.0 122:66.0 123:72.0 124:980.0 125:31.0 128:101.0 129:126.0 130:233.0 131:236.0				3639	1292	6290	6271	5274	5617	9718	4647	764	11960	4740	7684	12322	2053	6710	2315	2815	3503	2173	6824	3881	3026	1315	4542	7590	2840	2397	8123	2074	4193	1968	11498	6168	4191	1829	12908	2521	6102	1824	1379	12622	5315
200624	421877	373	200624	87:6.0 88:3.0 89:18.0 90:25.0 91:453.0 93:16.0 97:32.0 98:1.0 99:10.0 100:35.0 101:27.0 103:496.0 105:57.0 106:32.0 107:192.0 108:61.0 110:233.0 111:13.0 112:18.0 113:19.0 115:37.0 116:44.0 117:81.0 119:6.0 121:4.0 122:3.0 123:2.0 126:62.0 127:63.0 129:7.				19508	41168	20137	21999	11577	11804	24205	73295	43404	20360	98431	12926	46102	17947	10069	22860	6534	37757	55090	14946	20319	19362	100961	39775	11613	17609	54603	11808	6159	9537	19748	25880	91531	9213	18136	23551	34325	10003	36085	54733	31377	102924
223541	365519	98	223541	87:420.0 89:299.0 92:61.0 94:157.0 96:189.0 97:568.0 98:54185.0 99:3156.0 100:1308.0 101:1266.0 102:608.0 103:1590.0 105:261.0 107:410.0 109:535.0 111:7.0 112:650.0 113:172.0 115:2.0 116:226.0 117:2025.0 119:1854.0 120:347.0 121:5.0 124:521.0 126:98.0 127				32979	48922	26753	36820	20725	34640	16929	41517	38786	18499	58636	18874	38161	30609	15051	28728	10985	47978	41254	15979	28507	19413	50641	54879	16247	19712	50607	20757	16954	12220	29286	31496	34663	14370	17444	26989	45826	16033	34769	40084	23678	73150
213961	897509	91	213961	85:3.0 86:13.0 88:13.0 89:34.0 90:3.0 91:1981.0 92:349.0 93:833.0 94:184.0 95:258.0 96:10.0 97:8.0 98:4.0 100:5.0 101:42.0 102:8.0 103:184.0 104:77.0 105:563.0 106:389.0 107:199.0 108:287.0 109:71.0 110:7.0 111:2.0 114:7.0 115:90.0 116:186.0 117:895.0 118				7316	5874	9608	9087	6429	13232	15702	8707	9985	13045	4850	9965	6636	15389	20929	20217	15625	14971	19866	8855	13270	5336	6360	7285	13508	8603	7577	8135	13643	17078	15068	8064	9213	16255	13880	14738	6230	24410	9167	4869	25747	5762
281109	628352	98	281109	91:2924.0 92:581.0 93:2562.0 94:1689.0 95:95.0 96:584.0 98:47276.0 99:3225.0 100:712.0 101:82.0 102:207.0 104:88.0 105:361.0 106:334.0 107:973.0 108:149.0 109:96.0 110:2662.0 111:33.0 112:248.0 113:316.0 114:269.0 115:212.0 116:718.0 119:451.0 120:3936.0				32927	71061	30346	40181	15823	34452	19179	72446	63376	21163	112048	12583	56290	22890	9559	31502	6497	77523	65609	10773	32448	16841	89472	88021	13458	17697	77857	15499	15382	7246	32254	45164	64912	7794	16176	32139	60856	8600	36837	68656	21687	150832
223492	384421	142	223492	89:16.0 90:61.0 92:418.0 93:46.0 94:11.0 96:62.0 99:53.0 102:1651.0 104:82.0 105:166.0 109:583.0 110:1186.0 111:141.0 113:640.0 115:1084.0 116:188.0 117:4393.0 119:67.0 120:163.0 124:773.0 125:5961.0 126:220.0 128:4043.0 129:411.0 130:2577.0 131:902.0 132				55597	89931	45130	67068	39383	58470	40909	105893	80379	42397	134023	30603	78674	50879	25021	52884	21285	89787	82346	26083	50517	36114	125872	105233	28263	35935	88148	32925	36066	21622	54030	65737	88259	25552	37096	55838	80042	26104	69956	85665	44541	141626
226860	690521	139	226860	86:630.0 87:127.0 91:34.0 92:3.0 94:244.0 95:549.0 97:23.0 98:14.0 99:11.0 100:230.0 101:110.0 102:107.0 103:595.0 105:181.0 107:441.0 109:79.0 110:507.0 111:1432.0 112:474.0 113:4.0 114:58.0 115:20.0 116:124.0 117:335.0 118:50.0 120:12.0 123:3.0 124:176.				1790	4539	2060	2551	1127	2005	2085	5115	3682	2190	7797	928	10265	1234	559	1739	431	4246	3139	790	2476	1638	7889	4397	831	1924	4695	1354	476	534	1355	5118	9305	447	1439	2375	3491	934	4973	4476	3106	14489
210891	265181	130	210891	85:353.0 86:517.0 87:1.0 89:50.0 91:289.0 92:72.0 96:16.0 98:23.0 99:21.0 100:58.0 102:178.0 111:52.0 112:13.0 114:90.0 116:29.0 117:302.0 118:16.0 119:447.0 120:19.0 121:2.0 126:10.0 128:11.0 130:2132.0 131:310.0 132:59.0 134:152.0 142:9.0 144:529.0 145:				211724	240063	286321	423345	294706	304390	250514	342602	310534	259706	450175	241330	298799	221965	215490	143852	202045	362440	298133	208725	155878	294095	422661	394721	217420	235118	312240	285855	216408	188453	295965	289397	297986	236370	269950	228299	296438	261417	217088	344258	268806	443551
217784	431379	239	217784	85:355.0 88:616.0 89:1016.0 90:939.0 91:1042.0 92:1851.0 93:3244.0 94:1736.0 95:1754.0 96:2667.0 97:7403.0 98:1590.0 99:174.0 100:2392.0 101:798.0 102:268.0 103:604.0 104:1448.0 105:521.0 106:972.0 107:1872.0 108:1687.0 109:10465.0 110:5142.0 111:709.0 11				23417	38644	27988	29630	19865	27677	20063	51395	36659	23136	59791	18947	50278	17842	17058	24344	14086	39187	32191	16095	23905	18481	63226	49029	16941	21509	57186	21152	14561	13802	23043	38590	44483	17347	19478	30847	36010	16484	26326	32393	25573	76617
228203	457545	152	228203	85:2097.0 87:582.0 88:369.0 89:2210.0 90:194.0 91:4512.0 92:3621.0 93:1173.0 94:2310.0 95:1502.0 96:4968.0 97:1258.0 98:1794.0 99:576.0 102:141.0 103:1807.0 104:826.0 105:468.0 106:389.0 107:477.0 108:5130.0 109:2183.0 110:5089.0 111:13560.0 112:871.0 114				500	900	600	544	323	686	631	932	830	287	1627	576	733	238	410	653	398	751	720	508	393	350	511	1098	527	518	985	484	400	412	660	686	1218	432	279	667	821	466	284	680	574	1829
226916	510239	224	226916	85:197.0 86:464.0 88:103.0 90:111.0 92:9.0 93:172.0 94:288.0 98:541.0 99:292.0 100:75.0 101:191.0 107:562.0 109:169.0 110:237.0 114:36.0 118:47.0 120:89.0 124:16.0 134:759.0 135:146.0 137:51.0 140:1.0 143:13.0 146:59.0 150:40.0 152:141.0 155:3.0 156:152.0				6380	19552	4977	8076	1183	7528	2866	18007	15355	3003	24990	726	13429	3073	506	6064	343	17631	15151	984	6274	1864	26773	18225	549	2979	19221	1174	1456	372	4184	8687	21455	428	2004	4156	13689	497	9099	17615	2734	37197
226849	541089	388	226849	85:247.0 87:245.0 88:214.0 90:95.0 91:423.0 92:229.0 93:319.0 94:2107.0 95:1555.0 96:2524.0 97:593.0 99:121.0 101:311.0 102:465.0 103:293.0 104:136.0 106:79.0 107:16.0 108:2054.0 109:1138.0 110:784.0 111:31.0 112:69.0 114:294.0 115:12.0 116:1106.0 117:518				9667	14846	7525	11868	2587	11695	5374	16025	13672	5945	16711	2203	14230	4288	800	9266	407	15252	13858	1939	9983	4204	21394	13950	1530	5725	16671	2583	2433	673	4665	10286	15948	689	4023	5483	13964	1126	11781	16993	5214	24433
223499	675563	285	223499	85:13.0 86:288.0 87:1959.0 88:466.0 89:77.0 91:6.0 93:72.0 94:579.0 95:103.0 96:1814.0 97:262.0 98:1555.0 99:54.0 100:744.0 101:259.0 102:908.0 107:415.0 108:458.0 109:56.0 110:287.0 111:47.0 112:105.0 113:67.0 114:896.0 115:569.0 116:24.0 117:361.0 120:7				2253	5463	2195	3336	1009	2771	1117	6166	4102	1307	6679	902	3982	1759	645	2153	564	5283	4302	671	2461	1116	5167	6623	801	1167	5726	945	1014	534	2308	3275	4625	328	1071	2556	4227	632	3045	5030	1524	8152
224881	486165	309	224881	85:4925.0 86:5062.0 88:1022.0 89:1617.0 90:1040.0 91:888.0 92:752.0 93:2058.0 94:16199.0 95:4822.0 96:20834.0 97:2624.0 98:4179.0 99:2895.0 100:4121.0 101:1225.0 102:1095.0 103:2834.0 104:1073.0 105:394.0 106:303.0 107:683.0 108:12837.0 109:6219.0 110:164				9831	18317	8364	11449	4153	9981	5963	18287	15798	6070	26106	3826	13576	5950	2626	11084	2050	18579	18848	3111	9323	4784	32634	22006	3226	5766	19384	4354	4039	2319	7503	11565	17820	2587	4419	8506	16134	3263	12962	16105	5991	33294
240018	904978	290	240018	85:10.0 86:88.0 88:149.0 89:11.0 94:126.0 95:51.0 96:91.0 97:409.0 98:18.0 99:266.0 100:88.0 101:241.0 102:77.0 103:2671.0 104:43.0 105:69.0 107:79.0 108:281.0 111:82.0 112:58.0 113:97.0 114:175.0 116:347.0 117:515.0 118:36.0 120:42.0 123:46.0 124:91.0 12				1859	2391	1459	2006	624	1825	920	2083	2850	771	3274	449	2559	1095	285	1644	216	2811	2658	454	1408	809	2570	2524	274	1030	3026	602	758	266	1470	1830	3357	263	666	1535	2660	313	1747	2868	763	4565
arachidonic acid	833292	91	221144	85:302.0 87:36.0 88:18.0 89:14.0 90:64.0 91:7130.0 92:1328.0 93:3285.0 94:1469.0 95:1116.0 96:226.0 97:62.0 98:110.0 99:144.0 100:12.0 101:128.0 103:101.0 104:326.0 105:2157.0 106:2551.0 107:1496.0 109:343.0 110:144.0 112:84.0 114:8.0 116:548.0 117:3400.0	444899	C00219		11679	12924	20525	25591	18394	20574	29840	24021	19014	48512	20376	27065	24820	26509	32556	27001	28096	25684	34722	30686	20053	17760	23339	26084	27474	22820	17851	24350	22198	29288	33112	22978	22918	46865	30633	36109	16162	50802	19567	12075	47738	17372
229105	297744	100	229105	85:17074.0 86:655197.0 87:56222.0 88:22074.0 89:2002.0 90:498.0 91:8.0 92:178.0 94:13.0 95:683.0 96:930.0 97:1286.0 98:4302.0 99:12092.0 100:366044.0 101:38853.0 102:27610.0 103:7097.0 104:1790.0 105:234.0 109:259.0 111:1327.0 112:4464.0 113:13617.0 114:1				19676	27955	23351	21143	13357	20586	13264	52884	21064	19026	27922	8826	20905	31700	7471	14055	4383	30835	28698	7343	17206	10891	28254	40873	9889	9868	34550	6459	13485	6741	16782	21903	24632	6344	11812	21207	27472	8501	21195	30072	14622	34652
231590	321781	114	231590	85:1057.0 86:344.0 87:6439.0 89:8883.0 90:273.0 91:114.0 92:17.0 93:160.0 94:65.0 95:47.0 97:236.0 98:1499.0 100:1244.0 101:2687.0 102:7210.0 103:27719.0 104:2751.0 105:2100.0 106:68.0 107:52.0 108:271.0 110:2355.0 111:51.0 112:509.0 113:83.0 114:16467.0				8600	20306	9476	8496	5866	7511	8431	18014	16554	6847	25742	5671	11226	8547	5392	5639	4779	8943	14051	4284	7703	5817	22633	15893	5608	7344	17568	6861	6065	3797	6287	9324	27642	5598	5191	7238	7398	5005	11722	11948	7653	20810
226864	691552	211	226864	85:209.0 86:248.0 87:71.0 90:170.0 95:765.0 98:18.0 99:83.0 100:555.0 101:224.0 102:70.0 103:575.0 107:197.0 109:151.0 110:148.0 111:51.0 113:189.0 122:11.0 123:1.0 126:8.0 128:127.0 129:159.0 130:83.0 138:131.0 140:69.0 141:47.0 142:122.0 145:202.0 146:2				2656	4414	1416	3121	740	2250	1255	3532	5327	1646	3553	1266	5502	1123	1076	2745	487	4123	4988	1266	1695	1456	4603	2681	912	2034	3735	1456	756	607	2222	3267	4879	682	1277	1921	3132	826	2370	4089	1584	5290
glycine	364262	174	227957	85:106.0 86:18631.0 87:1854.0 88:801.0 91:1.0 92:57.0 99:116.0 100:9522.0 101:1976.0 102:1247.0 104:2.0 105:236.0 106:36.0 107:610.0 110:120.0 111:82.0 113:277.0 114:297.0 115:275.0 116:491.0 117:2457.0 118:465.0 119:450.0 120:26.0 122:5.0 124:68.0 125:11	750	C00037		144856	283016	293464	247133	240060	271282	141965	365998	279191	228665	243431	163640	298449	210389	88952	205284	59428	271208	337960	120805	499128	214453	184472	395775	80583	182648	258671	229039	323457	107646	210238	356288	375472	63622	208153	306956	359995	85168	169106	235519	362565	453627
223973	1028825	243	223973	85:286.0 88:129.0 95:141.0 96:165.0 97:270.0 98:191.0 99:142.0 100:51.0 101:819.0 102:39.0 103:376.0 106:141.0 110:4.0 111:88.0 113:203.0 115:182.0 116:136.0 117:132.0 120:54.0 121:98.0 123:66.0 124:20.0 125:71.0 129:4677.0 130:713.0 131:483.0 132:39.0 13				920	4157	3457	5575	4935	3854	3568	5993	1682	5128	4294	3452	3267	4370	11559	5924	5420	5445	11689	5716	3035	6168	4589	3223	5520	7175	1502	3459	3808	4965	8413	3512	3966	9266	5602	7684	5204	6428	4142	1415	5788	4144
241403	468354	212	241403	85:587.0 86:128.0 88:986.0 89:822.0 90:155.0 92:76.0 94:618.0 95:166.0 96:4166.0 97:420.0 98:449.0 99:405.0 100:973.0 101:198.0 102:133.0 103:800.0 105:5.0 106:46.0 108:562.0 109:377.0 111:836.0 112:157.0 113:66.0 114:217.0 115:124.0 116:1981.0 118:280.0				1823	3866	1208	2453	637	1584	1098	1554	2798	1104	6239	515	3446	735	354	1606	208	3966	2940	586	1549	899	6270	4786	401	406	3958	546	469	311	1034	2165	3736	406	514	892	129	535	1329	3109	943	5452
224798	464635	329	224798	86:473.0 90:134.0 91:88.0 92:102.0 93:2029.0 94:3496.0 95:1106.0 96:3933.0 97:586.0 98:1453.0 99:184.0 100:1270.0 101:1158.0 104:136.0 105:36.0 107:1446.0 108:2773.0 109:1255.0 110:3941.0 111:175.0 112:940.0 114:439.0 116:716.0 118:20.0 121:75.0 122:68.0				1945	2842	1226	1570	575	1835	1015	2503	3233	1100	4887	372	1582	522	340	1477	490	3321	2771	521	1428	855	6197	3436	408	1062	3554	636	539	898	1436	1258	5704	985	590	705	2757	332	1875	3169	1088	5638
226280	369173	98	226280	85:5416.0 86:4753.0 87:7225.0 88:3954.0 89:1111.0 90:535.0 93:141.0 94:2994.0 95:1070.0 96:2592.0 97:919.0 98:349245.0 99:28603.0 100:2729.0 101:5533.0 102:3612.0 103:51775.0 104:4432.0 105:4960.0 106:14.0 108:662.0 109:210.0 110:237.0 111:949.0 112:3022.				135693	353158	111850	162459	76256	144873	93948	367452	314829	96717	542735	78513	272883	136033	63121	132279	55890	335468	294880	66765	126764	83681	353908	416458	64561	94951	368275	74489	69092	54866	130009	173501	364730	67888	88277	134401	279067	68480	204053	322777	102967	694165
220010	1027429	227	220010	85:56.0 89:26.0 90:29.0 91:52.0 93:36.0 95:125.0 96:11.0 97:99.0 98:202.0 99:69.0 100:15.0 101:9.0 104:10.0 105:9.0 107:26.0 108:5.0 109:87.0 110:9.0 111:75.0 112:35.0 117:31.0 121:33.0 123:126.0 124:8.0 125:64.0 126:2.0 129:82.0 130:31.0 135:26.0 137:325				9100	8759	7827	12098	11331	10412	5727	9607	8384	9078	3175	9492	4717	12605	10430	11895	9607	10618	15814	9396	9623	11998	9731	2297	8193	9410	8258	10045	8581	8905	11212	5528	2970	15784	11795	6257	8026	12442	5323	8686	10969	4896
240264	455266	320	240264	86:10873.0 87:1358.0 88:545.0 91:23.0 97:4.0 98:955.0 99:243.0 100:5490.0 101:1270.0 102:689.0 103:1074.0 104:3.0 105:2.0 107:266.0 110:2586.0 111:253.0 114:390.0 115:245.0 116:833.0 117:2473.0 118:364.0 119:19.0 123:127.0 127:1.0 129:573.0 130:2372.0 131				1473	2714	2062	1766	1140	2119	775	1891	2816	1355	2861	863	3014	1357	569	1989	280	1542	2683	822	3481	1303	2089	3384	534	1280	2433	1987	1516	520	1484	2678	4126	163	1332	1815	3267	434	1566	1965	1500	6387
226859	926164	290	226859	85:8.0 86:230.0 88:114.0 90:95.0 92:9.0 93:49.0 95:285.0 96:156.0 97:532.0 98:388.0 99:114.0 100:245.0 101:346.0 102:88.0 103:4923.0 104:376.0 105:29.0 108:7.0 110:198.0 111:307.0 112:128.0 113:34.0 114:243.0 116:444.0 117:593.0 124:141.0 128:533.0 129:19				15450	41265	16318	18272	5546	15569	5768	38868	33076	5756	63194	1326	30475	15715	777	10708	471	42774	31938	1213	10337	4463	36931	46230	1734	5390	45707	2437	6846	660	19017	25503	42705	477	4185	18191	34906	903	17924	39238	5332	73960
224033	605457	98	224033	86:2.0 88:74.0 89:93.0 90:4.0 94:176.0 95:103.0 96:797.0 98:21483.0 99:1611.0 100:392.0 101:142.0 104:514.0 108:114.0 109:60.0 110:680.0 112:169.0 113:380.0 114:461.0 115:23.0 119:1.0 122:131.0 123:14.0 124:568.0 126:707.0 128:931.0 129:384.0 132:1.0 137:				5684	7710	6114	8675	2285	4907	4998	16119	10018	5462	3620	2052	9624	5968	1302	6504	1066	8692	11369	1588	5645	3865	6403	12403	1688	4916	10635	1494	1861	1251	3618	7407	10250	1270	3476	4331	9791	956	8921	11726	2848	12464
223548	749189	294	223548	86:338.0 91:350.0 92:15.0 93:78.0 94:42.0 95:90.0 97:60.0 98:176.0 99:205.0 102:52.0 103:21.0 107:240.0 108:5.0 109:6.0 121:4.0 122:42.0 123:33.0 124:71.0 130:290.0 134:593.0 135:121.0 136:12.0 143:110.0 147:3414.0 148:161.0 151:12.0 156:22.0 160:1.0 165:				1446	1384	1455	1656	1903	930	1258	2006	837	987	1734	157	478	1419	2567	1340	2034	1983	701	2324	1861	2674	852	1745	1904	2346	1016	2777	2384	884	1824	1741	1438	2619	2375	1020	1870	2923	772	2775	1808	1534
223778	226081	159	223778	85:113.0 86:205.0 87:100.0 88:141.0 89:1474.0 90:632.0 91:107.0 92:88.0 94:1229.0 96:8175.0 97:1325.0 98:1691.0 99:2012.0 101:1964.0 104:1296.0 108:484.0 109:581.0 111:2132.0 112:2884.0 113:5231.0 114:4542.0 115:1655.0 116:600.0 122:247.0 124:592.0 125:18				204412	365428	61553	213590	129228	276969	118410	370461	326849	186427	424917	137566	368569	81480	109847	145982	92471	326792	85539	122148	211561	102791	335448	381636	46340	115028	373390	141024	99352	91135	183123	96241	75296	109667	95539	77867	318293	117350	165900	83687	105874	517129
235373	407853	258	235373	85:469.0 87:172.0 88:251.0 89:1073.0 91:425.0 92:674.0 93:200.0 94:1745.0 95:589.0 96:1132.0 97:410.0 98:504.0 99:2105.0 101:826.0 103:1897.0 104:24.0 105:309.0 107:1970.0 108:4329.0 109:677.0 110:8280.0 111:2751.0 112:347.0 113:292.0 114:813.0 115:1905.0				8117	12583	3771	8093	1424	10939	2892	7801	21428	3043	18317	2321	7691	2974	1656	8734	834	14552	8512	2611	5328	3144	22463	10116	2437	7626	12331	1345	1517	879	5062	5267	17557	1116	2786	2905	12216	1364	8898	10631	3541	27728
281187	574112	185	281187	85:859.0 86:1257.0 88:81.0 90:3.0 94:57.0 95:200.0 96:1.0 98:615.0 99:373.0 100:1433.0 101:419.0 102:350.0 107:170.0 108:112.0 110:2324.0 112:228.0 113:183.0 114:101.0 116:814.0 117:1979.0 118:101.0 119:1.0 120:1.0 122:4.0 124:275.0 127:271.0 128:319.0 13				3526	1776	3464	4549	3359	3533	6778	2423	1409	4940	3611	6109	3459	3123	3295	3636	2180	2471	4384	3849	2427	1511	1810	2342	3701	2277	1847	3899	4737	2112	1465	2865	4074	2331	732	2697	1810	2619	1187	2948	4907	3394
227358	308098	142	227358	85:1167.0 86:1684.0 88:1144.0 89:4877.0 90:144.0 91:1932.0 92:4177.0 93:2900.0 94:1879.0 95:412.0 99:464.0 100:2961.0 101:1455.0 102:1308.0 103:1330.0 104:352.0 105:752.0 106:4122.0 107:31291.0 108:11162.0 109:71.0 111:1073.0 113:392.0 114:7611.0 115:732.				5410	12710	4090	6670	2464	5280	3105	14010	10551	3033	19171	1519	9216	5272	1554	4640	1113	12654	11105	1442	4773	2369	17182	15142	1848	3196	12750	1652	2902	1153	6109	7725	12701	1970	2570	6225	10444	1597	6451	11293	3092	21467
glycerol-alpha-phosphate	588999	299	231662	85:192.0 86:1048.0 87:8128.0 88:516.0 91:1930.0 92:41.0 93:468.0 94:454.0 96:86.0 97:477.0 99:456.0 100:682.0 101:19750.0 102:3500.0 103:16244.0 104:1452.0 105:1040.0 107:1196.0 108:84.0 109:121.0 110:2738.0 111:361.0 112:1814.0 113:2705.0 114:553.0 115:3	754	C00093		7523	10030	9910	13085	10524	16084	14343	26434	10709	24462	12262	15468	13212	16997	17599	15830	19008	18476	30037	17076	15262	19799	12086	14132	10233	14827	14402	16602	13351	17506	15179	23041	12335	31953	20619	17874	12889	28315	7889	10408	38645	8610
226911	914309	290	226911	85:23.0 86:52.0 88:63.0 93:2.0 94:100.0 95:356.0 96:8.0 97:555.0 98:119.0 100:87.0 101:45.0 103:3133.0 104:94.0 105:34.0 109:35.0 111:27.0 113:58.0 114:123.0 116:684.0 117:470.0 123:12.0 124:41.0 125:44.0 128:160.0 129:146.0 130:114.0 138:57.0 140:17.0 14				4971	10258	5377	6099	2071	5006	2246	8326	9371	1961	15552	778	8270	4767	398	4047	272	10607	8831	552	3708	1627	7973	10348	843	2162	13855	1189	2626	342	6235	6458	12620	448	1601	5110	10084	505	5943	10561	2416	19930
220009	459742	172	220009	86:414.0 88:1149.0 90:47.0 91:4.0 92:6.0 93:43.0 94:97.0 95:134.0 96:517.0 97:1784.0 98:1450.0 99:190.0 100:103.0 103:35.0 107:41.0 109:16.0 110:161.0 112:90.0 114:44.0 115:13.0 116:38.0 117:446.0 122:25.0 124:1004.0 125:79.0 128:469.0 129:69.0 130:177.0				69324	87443	71570	81994	83404	83725	64788	89293	78722	59922	61164	72491	57487	51280	67638	65520	61169	87976	78826	62433	68855	66461	88342	95364	67779	59437	87641	72171	68674	55459	49218	57757	91304	73949	72036	55628	82230	74406	53084	87847	70130	105355
putrescine	588249	174	200452	86:318.0 87:200.0 88:8.0 91:33.0 92:33.0 93:28.0 94:8.0 95:6.0 98:3.0 99:13.0 100:147.0 102:3.0 106:5.0 108:5.0 109:8.0 110:15.0 112:6.0 114:8.0 115:2.0 116:7.0 118:1.0 123:3.0 126:23.0 128:10.0 130:64.0 131:1.0 132:5.0 135:1.0 136:3.0 137:3.0 138:3.0 140	1045	C00134		1951	1778	2693	2405	2910	3693	22888	2834	1918	2745	2443	1996	2443	1727	2219	6244	1581	2296	2836	1617	2610	4661	7971	13241	1661	3513	3741	1639	4687	1132	2295	2170	7862	1652	9941	4750	4863	1445	2496	2369	2476	7844
281182	518697	228	281182	88:243.0 91:118.0 95:1.0 96:471.0 97:290.0 98:1070.0 99:8469.0 100:1216.0 102:585.0 103:231.0 107:92.0 108:232.0 109:413.0 110:4850.0 111:238.0 112:28.0 113:83.0 114:360.0 118:462.0 119:132.0 120:258.0 122:62.0 124:716.0 126:892.0 127:538.0 128:478.0 129:				1391	2257	1862	1490	713	1051	781	1874	2005	786	3054	818	1694	1147	863	1228	855	2054	1871	708	1173	817	2243	2830	775	936	3184	1267	801	575	1401	1478	2783	563	720	1507	1641	508	1485	1865	944	3912
226923	743658	290	226923	85:46.0 86:176.0 88:269.0 96:14.0 97:217.0 99:79.0 100:131.0 102:64.0 103:2532.0 104:40.0 114:74.0 116:537.0 117:736.0 124:53.0 125:65.0 126:81.0 130:440.0 132:21.0 143:89.0 144:768.0 146:24.0 157:19.0 158:293.0 160:478.0 171:12.0 172:54.0 173:17.0 174:29				2609	11025	2677	2972	2640	928	3131	4095	7626	2463	3084	1974	4125	8563	1335	3479	1320	3523	4760	1534	2016	3545	5931	1692	2116	2921	4246	2094	2198	983	7906	1330	8598	1321	3117	2173	5074	1343	11131	8047	1872	7953
281193	557891	144	281193	86:352.0 89:10083.0 90:889.0 91:575.0 94:528.0 98:3939.0 99:87.0 100:2035.0 101:1976.0 102:1518.0 103:2897.0 104:194.0 111:4.0 113:320.0 114:589.0 115:1225.0 116:4076.0 117:647.0 118:1021.0 119:527.0 122:210.0 128:1905.0 129:115.0 130:563.0 131:947.0 132:				2106	4514	1172	2161	1031	1528	777	4864	3353	974	6621	674	1966	1781	838	1357	418	4146	3600	591	1778	870	7473	4869	855	542	4731	868	632	433	2278	2084	3356	647	801	1282	3068	706	2009	3637	755	8240
223576	467132	329	223576	86:479.0 88:182.0 90:18.0 91:79.0 94:1751.0 95:657.0 96:2466.0 97:144.0 99:41.0 100:211.0 101:46.0 102:152.0 103:1691.0 104:168.0 107:431.0 108:1424.0 109:903.0 110:2128.0 111:111.0 112:64.0 113:45.0 114:508.0 115:176.0 116:216.0 118:369.0 119:234.0 123:2				3387	5827	2430	3500	2282	4101	2419	4758	6371	2376	9127	1515	1618	1071	1407	3149	1209	7322	6975	1834	3189	2230	11508	7703	1722	2661	5928	2031	1913	1123	3198	1498	5991	1462	2175	951	5973	1661	2801	6857	2290	9284
231161	575302	362	231161	85:603.0 86:1555.0 87:283.0 93:20.0 94:15.0 97:1035.0 98:816.0 99:2025.0 103:3726.0 104:588.0 105:885.0 107:494.0 111:47.0 113:1825.0 114:2320.0 116:457.0 118:1495.0 124:59.0 125:322.0 126:2657.0 128:181.0 129:2575.0 130:878.0 132:3196.0 134:693.0 136:214				365	341	375	270	345	373	498	421	354	519	245	287	400	445	433	400	411	494	393	452	268	399	281	442	467	496	600	571	339	396	375	250	392	462	378	339	299	400	214	261	406	502
223527	373284	158	223527	85:1410.0 86:447.0 88:234.0 89:1.0 90:105.0 91:21.0 93:40.0 94:1.0 96:704.0 97:101.0 98:1497.0 99:104.0 100:1297.0 101:576.0 102:569.0 103:1774.0 104:516.0 105:2.0 106:93.0 107:123.0 108:264.0 109:2.0 110:166.0 111:30.0 112:27.0 113:642.0 114:476.0 115:77				3521	4925	2626	4456	2108	3295	3026	6196	4915	2834	7935	2007	4547	2183	1776	3485	1285	5368	4908	2011	3344	2417	12156	6577	1937	2761	4473	2939	1465	1015	2600	3746	6056	1497	2317	2257	4344	1532	3550	4668	3069	8624
223566	624258	156	223566	86:115.0 98:206.0 99:618.0 100:171.0 102:53.0 110:34.0 114:20.0 119:92.0 120:42.0 126:39.0 130:5.0 132:351.0 139:54.0 140:142.0 141:152.0 155:323.0 156:4867.0 157:474.0 158:91.0 168:5.0 170:119.0 174:304.0 184:30.0 188:3.0 194:8.0 207:30.0 209:38.0 212:42				7605	5449	19367	6385	6488	5894	6467	8757	3818	6982	5480	9776	17098	4431	9157	8709	5745	5200	7361	6794	3673	9963	5683	4570	8544	11626	11668	8572	6357	6237	12989	4117	6876	9297	3495	4996	4116	4443	11034	10759	3559	20607
213697	456893	232	213697	86:2775.0 87:1232.0 88:314.0 89:512.0 92:2.0 93:4.0 94:14.0 99:7.0 100:22496.0 101:2806.0 102:1248.0 103:1570.0 104:214.0 105:567.0 107:24.0 108:5.0 109:7.0 114:3170.0 115:3935.0 116:937.0 117:3696.0 118:495.0 119:810.0 120:83.0 121:67.0 123:32.0 125:17.0				860	2018	739	887	557	838	627	2578	1810	606	1879	348	1463	739	351	745	332	1585	1891	435	906	346	2015	2733	528	854	1845	571	454	343	908	1065	3097	276	483	990	1402	366	1074	1845	806	3871
217870	401556	142	217870	87:20.0 88:22.0 90:4.0 91:10.0 94:29.0 96:203.0 97:64.0 100:116.0 103:35.0 105:1.0 106:2.0 107:115.0 109:254.0 110:1017.0 112:35.0 113:215.0 114:313.0 115:44.0 116:351.0 118:28.0 119:5.0 122:113.0 123:16.0 124:1203.0 125:2314.0 126:179.0 128:1288.0 129:10				21203	60015	29084	43525	23199	37031	25252	66111	50739	22896	86267	11286	51402	33829	15362	24370	12951	57129	52303	15743	33628	22461	84606	67859	17230	22368	56816	20117	5282	13076	27230	39462	50711	15820	22355	37211	52283	15733	42388	55951	27888	97091
240017	351090	294	240017	85:53.0 86:1249.0 87:762.0 88:516.0 89:3720.0 90:514.0 91:258.0 92:221.0 93:532.0 94:129.0 95:10.0 96:620.0 97:25.0 98:107.0 99:659.0 100:2964.0 101:916.0 102:1178.0 103:2849.0 104:527.0 105:996.0 106:1174.0 107:232.0 108:116.0 110:1812.0 111:101.0 112:1.				661	1001	675	1277	560	773	999	1210	1921	862	2875	472	1061	731	341	1063	343	1329	1811	618	638	708	2570	1944	418	1120	1349	521	328	317	485	796	1461	408	779	478	1278	504	1261	1529	1018	1977
281132	608773	276	281132	86:2803.0 87:25.0 88:80.0 99:338.0 100:410.0 110:181.0 117:1.0 124:40.0 127:46.0 128:132.0 129:1.0 130:229.0 138:9.0 148:1.0 149:1.0 150:47.0 151:15.0 155:635.0 156:579.0 158:191.0 164:111.0 170:11.0 177:1.0 184:67.0 188:50.0 199:68.0 204:53.0 225:17.0 22				1087	1436	765	1210	780	863	1056	1082	771	594	1588	923	976	910	355	878	666	1004	581	1067	535	383	1268	1106	476	579	1061	749	915	353	523	535	1047	455	728	693	1037	550	674	726	934	1432
270508	1084500	227	270508	85:612.0 87:15.0 91:133.0 98:40.0 99:309.0 101:76.0 109:21.0 115:50.0 121:201.0 123:102.0 127:84.0 133:84.0 134:121.0 137:62.0 141:8.0 144:18.0 155:1234.0 161:48.0 163:115.0 165:85.0 168:18.0 169:224.0 170:44.0 171:289.0 172:11.0 177:45.0 178:40.0 179:27.				1326	1913	1397	3717	2676	2107	993	2157	2431	2059	702	1694	818	1511	1739	2652	1940	2243	4231	1777	2474	3066	2136	635	1493	2311	2518	2639	1904	1780	1545	889	1150	3996	2458	953	1785	2656	1155	2259	2833	1415
202572	613924	217	202572	85:5549.0 86:994.0 87:6872.0 88:10091.0 89:17736.0 90:1939.0 91:1049.0 92:159.0 93:262.0 94:252.0 95:909.0 96:284.0 97:2116.0 98:1074.0 99:7296.0 100:1140.0 101:19429.0 102:7759.0 103:97671.0 104:9810.0 105:6647.0 106:554.0 107:430.0 108:153.0 109:4529.0				1285	1770	17010	1700	3658	1246	2084	1845	2601	969	2081	2471	27074	2743	1521	1258	918	1397	1329	1665	1099	1475	1210	1216	15373	8293	7150	8611	2057	1754	1748	2347	29124	1493	1729	1345	1553	1493	7939	1854	1895	17188
281134	781899	324	281134	85:501.0 86:714.0 88:97.0 91:105.0 93:712.0 94:500.0 95:3021.0 96:3272.0 97:1830.0 98:2532.0 99:344.0 105:210.0 106:47.0 107:687.0 108:323.0 109:1027.0 110:1461.0 111:826.0 112:327.0 113:114.0 116:1109.0 117:11726.0 118:840.0 119:645.0 121:414.0 122:205.0				1289	1699	1170	2159	1108	635	3235	2065	1661	4744	1415	2867	1083	1155	1226	1765	3284	1577	1483	4288	1053	831	635	1840	1799	1831	1322	1428	1155	1168	1183	1052	1443	2278	1936	767	1930	1688	1738	1865	1409	1904
Total # of Metabolites:
254
[truncated: 22 more columns]
