# Supplementary material for: Plasma Metabolomic Profiles Reflective of Glucose Homeostasis in Non-Diabetic and Type 2 Diabetic Obese African-American Women
Source: PLoS One. 2010 Dec 10;5(12):e15234. doi: 10.1371/journal.pone.0015234 (PMC3000813; doi:10.1371/journal.pone.0015234)
Supplement: Table S3 — Loadings values for each of the principal components (metabolite factors) used to generate subject PC scores depicted in Figure 4 . (XLS) [file pone.0015234.s003.xls]

## Sheet: S3, Supplemental Table 3
S3, SUPPLEMENTAL TABLE 3; PCA LOADINGS VALUES FOR METABOLITES DRIVING SEPARATION OF GROUPS IN FIG. 4
PC1	PC1		PC2	PC2
Loadings
0.161597	218520		0.165721	270003
0.157249	228900		0.163376	199794
0.156218	224521		0.151922	227352
0.15355	228897		0.151558	199777
0.153287	281178		0.15015	225539
0.151209	281328		0.149163	3,6-anhydrogalactose
0.150307	281133		0.146838	223402
0.147389	281111		0.146081	fructose
0.146174	benzylalcohol		0.145037	valine
0.145744	228885		0.143511	206604
0.145595	224547		0.142444	leucine
0.144666	281145		0.141188	281257
0.142886	223905		0.138105	Total BCAA (valine, leucine, isoleucine, ketoisocaproic acid)
0.140601	272306		0.138062	gluconic acid
0.140055	2-phenylpropanol		0.13417	223513
0.139678	227353		0.13288	226851
0.138577	281122		0.131844	cystine
0.131967	281107		0.130674	228147
0.130176	213353		0.130295	leucine% of total amino acids
0.127647	229108		0.130071	phenylalanine
0.126248	213526		0.127773	241310
0.120156	224788		0.12646	serine
0.118738	228927		0.126158	213304
0.116666	224849		0.125777	226853
0.116651	241369		0.119853	228911
0.115869	221574		0.119625	213193
0.115798	224037		0.117673	217797
0.108495	tryptophan		0.115641	inulobiose 2
0.106778	217866		0.11208	pyrophosphate
0.106673	arachidonic acid		0.107171	226935
0.106205	benzoic acid		0.10622	228143
0.106189	268590		0.105982	213143
0.105771	281134		0.1035	2-deoxyerythritol
0.10358	pyrophosphate		0.0985464	227367
0.102871	glyceric acid		0.0976273	2-ketoisocaproic acid
0.100707	281271		0.0950408	alpha mannosylglycerate
0.0990552	204425		0.0931684	phosphoric acid
0.0986768	281268		0.0891518	224037
0.0973473	269983		0.0829133	224547
0.0969383	glycerol-alpha-phosphate		0.0827284	239966
0.0958577	228809		0.0808787	231713
0.094993	231161		0.0806205	281268
0.0945951	281128		0.0804704	oleic acid
0.0937213	221569		0.0797885	229108
0.0917182	270508		0.0791088	tryptophan
0.0878681	238566		0.0777695	2-hydroxybutanoic acid
0.0816317	231657		0.0766965	2-phenylpropanol
0.0803736	tyrosine		0.075095	210286
0.080097	indole-3-lactate		0.0723798	histidine
0.0799951	281187		0.0714681	241369
0.0789874	228309		0.0684365	223505
0.0747178	223548		0.0657085	281178
0.0747056	220010		0.0626524	221569
0.0732805	phosphoric acid		0.0619611	linoleic acid
0.0731262	224522		0.0606503	stearic acid
0.069573	211898		0.0601224	3-hydroxybutanoic acid
0.0692687	227298		0.0598479	223506
0.0689042	213961		0.0597853	228927
0.0665774	glycerol-beta-phosphate		0.0566424	238566
0.064193	204344		0.0564813	222049
0.0637836	220169		0.0553103	lathosterol
0.0626482	phenylalanine		0.053838	273450
0.0610328	281132		0.0533817	benzylalcohol
0.0577298	239966		0.0527806	224521
0.0568188	210891		0.0510185	225555
0.0565539	lathosterol		0.0493465	272306
0.0507802	241114		0.0488181	palmitoleic acid
0.0506213	281185		0.0486122	228897
0.0484415	223973		0.0484104	208655
0.0484392	alpha ketoglutaric acid		0.0465016	tocopherol alpha
0.0455293	220009		0.0444766	213353
0.0447285	223597		0.0442162	valine% of total amino acids
0.04333	226935		0.0434242	281328
0.0431575	fumaric acid		0.0422537	223597
0.0402425	2-aminoadipic acid		0.0392979	N-methylalanine
0.0360189	conduritol-beta-epoxide		0.0387965	palmitic acid
0.0332451	223566		0.0370764	glucuronic acid
0.0318848	tocopherol alpha		0.0343565	231657
0.0289141	217797		0.0343251	urea
0.0280566	273450		0.0337611	228809
0.0275945	urea		0.0322408	213961
0.0230756	268506		0.0295633	281107
0.0228677	cystine		0.0287378	228900
0.0214573	225555		0.028496	224788
0.0207033	shikimic acid		0.0282723	218520
0.0192734	valine		0.0262374	2-aminoadipic acid
0.0161965	pyrazine 2,5-dihydroxy		0.0245643	224849
0.0145564	273236		0.0243399	arachidonic acid
0.0111774	lactic acid		0.0235569	glyceric acid
0.0108524	serine		0.0231833	heptadecanoic acid
0.0106114	alpha mannosylglycerate		0.0228057	228309
0.0086779	240017		0.0207943	indole-3-lactate
0.00813897	229203		0.0196439	268506
0.00295653	202572		0.0192094	281111
0.00269315	226850		0.0162581	281145
0.000822309	histidine		0.0158003	274531
0.000446738	2-ketoisocaproic acid		0.0147824	tyrosine
-0.000264798	226853		0.0124434	273236
-0.00349395	Total BCAA (valine, leucine, isoleucine, ketoisocaproic acid)		0.0118503	221574
-0.00675333	2-deoxyerythritol		0.0103554	223973
-0.00839577	N-methylalanine		0.010212	281271
-0.00936653	1-monoolein		0.00996119	281128
-0.0127594	229962		0.00977925	281133
-0.0163572	223506		0.00691328	226850
-0.0171074	222169		0.00443807	281185
-0.0187438	leucine		0.00437458	1-monoolein
-0.0210136	227367		-0.0006888	213526
-0.022462	228911		-0.00299787	glycerol-alpha-phosphate
-0.0247658	223402		-0.00414807	220010
-0.0252083	206604		-0.00419747	223548
-0.0253863	270003		-0.00452442	281122
-0.0260506	glucuronic acid		-0.00633518	269983
-0.0272436	xylose		-0.00819231	shikimic acid
-0.027632	inulobiose 2		-0.00866181	2-oxogluconic acid
-0.0283563	2-hydroxybutanoic acid		-0.00866879	alpha ketoglutaric acid
-0.0288583	213304		-0.00944413	268590
-0.0298352	2-oxogluconic acid		-0.00955937	229962
-0.0344146	281257		-0.0105838	227353
-0.0347834	274531		-0.0141736	behenic acid
-0.0348133	226923		-0.01673	228885
-0.0354402	behenic acid		-0.0180109	conduritol-beta-epoxide
-0.0359573	3,6-anhydrogalactose		-0.0190535	204425
-0.0408436	226858		-0.0196891	281187
-0.0415584	stearic acid		-0.0200312	xylose
-0.0416537	239852		-0.0213731	fumaric acid
-0.042961	valine% of total amino acids		-0.0240256	benzoic acid
-0.0438313	239882		-0.0278849	223566
-0.0448989	235678		-0.0281407	229203
-0.0457457	199794		-0.0306062	glycerol-beta-phosphate
-0.0463638	fructose		-0.0367764	223905
-0.046364	227352		-0.0406071	pyrazine 2,5-dihydroxy
-0.0471866	213193		-0.0407466	231161
-0.0477193	linoleic acid		-0.0409019	270508
-0.0503845	gluconic acid		-0.0435821	lactic acid
-0.0517624	heptadecanoic acid		-0.0476528	281134
-0.0530877	oxalic acid		-0.0557608	222169
-0.0543319	225539		-0.0581881	269969
-0.0546227	palmitic acid		-0.0602524	281216
-0.0571938	269969		-0.0605693	202572
-0.0602022	228147		-0.0629939	palmitic acid butyl ester
-0.0621725	231713		-0.0661447	227298
-0.0625284	leucine% of total amino acids		-0.0677411	217866
-0.0646751	213143		-0.0686842	220009
-0.0653932	2-hydroxyvaleric acid		-0.0687963	224522
-0.0671588	199777		-0.0703383	211898
-0.0698126	223505		-0.081658	2-hydroxyvaleric acid
-0.0702828	210286		-0.0836738	241114
-0.0703279	palmitic acid butyl ester		-0.0843953	220169
-0.0713369	228143		-0.0936314	210891
-0.0742535	palmitoleic acid		-0.0948788	235678
-0.0755602	241310		-0.0952015	281132
-0.0767285	222049		-0.0956883	204344
-0.081664	223513		-0.0998593	226923
-0.0821838	3-hydroxybutanoic acid		-0.107158	239882
-0.0827594	226851		-0.108194	239852
-0.088575	208655		-0.124984	226858
-0.0900059	oleic acid		-0.135823	240017
-0.0968297	281216		-0.144447	oxalic acid
MEAN:			MEAN:
0.0319228			0.0330665
STDEV:			STDEV:
0.0731018			0.0725884
MEAN + (1 X STDEV):			MEAN + (1 X STDEV):
0.105025			0.105655
MEAN - (1 X STDEV):			MEAN - (1 X STDEV):
-0.0411789			-0.0395218
TOTAL METABOLITE COUNT WITH LOADINGS >1 STANDARD DEVIATION FROM THE MEAN:		92
(COLORED):
